# Supplementary material for: Synthesis, structures and fluorescence properties ofgem-linked cyclic tetraphenylethylenes and cyclic hexaphenylethylenes
Source: Royal Society of Chemistry journal article supplement (doi:10.1039/d2qo00395c), 2022-01-01
Supplement: d2qo00395c1.pdf [file d2qo00395c1.pdf]

## Electronic Supplementary Information

### Synthesis, Structures and Fluorescence Properties of gem-Linked Cyclic Tetraphenylethylenes and Cyclic Hexaphenylethylenes

Huowang He,<sup>‡a</sup> Jian-An Li,<sup>‡a</sup> Yihuan Zhang,<sup>a</sup> Sumra Idrees,<sup>a</sup> Jin Cai,<sup>a</sup> Yongying Li,<sup>a</sup> Atsuhiko Osuka,<sup>\*b</sup> Bingjia Xu,<sup>\*a</sup> and Hua-Wei Jiang<sup>\*a</sup>

a. School of Chemistry, South China Normal University, Guangzhou 510006, P. R. China; E-mail: bingjiayu@m.scnu.edu.cn; hwjiang@m.scnu.edu.cn.

b. Key Laboratory of the Assembly and Application of Organic Functional Molecules of Hunan Province, College of Chemistry and Chemical Engineering, Hunan Normal University, Changsha 410081, P. R. China; Email: oosuka.atsuhiko.46c@st.kyoto-u.ac.jp.

‡ These authors contributed equally.

\* Corresponding authors.

### Table of Contents

|                                                        |    |
|--------------------------------------------------------|----|
| Table of Contents .....                                | 1  |
| 1. General Information .....                           | 2  |
| 2. Synthetic Procedure and Characterization Data ..... | 2  |
| 3. NMR spectra.....                                    | 8  |
| 4. Mass Spectra.....                                   | 27 |
| 5. X-ray Crystallography.....                          | 34 |
| 6. DFT Calculations .....                              | 38 |
| 7. Photophysical Measurements.....                     | 53 |
| 8. References .....                                    | 90 |

## 1. General Information

$^1\text{H}$  and  $^{13}\text{C}$  NMR spectra were recorded on a Bruker AVANCE NEO 600 spectrometer (operating as 600 MHz for  $^1\text{H}$  and 151 MHz for  $^{13}\text{C}$ ) at 298.0 K using the residual solvent signals as the internal reference for  $^1\text{H}$  ( $\delta = 7.26$  ppm in  $\text{CDCl}_3$ ) and  $^{13}\text{C}$  ( $\delta = 77.16$  ppm in  $\text{CDCl}_3$ ). Mass spectra (MS) were obtained from a Thermo Scientific Q Exactive HF Orbitrap-FTMS. Semipreparative GPC was carried out on a Shimadzu recycling GPC system equipped with a LC-20 AD pump, SPD20A UV detector and a set of JAIGEL 2.5H ( $20 \times 600$  mm) columns in Chloroform as the eluent at a flow rate of 5.0 mL/min. Absolute PL quantum yields and emission decay curves of the compounds were collected by using a spectrometer (FLS980) from Edinburgh Instruments equipped with an integrating sphere. Steady-state PL spectra were obtained by the spectrophotometers of QE65 Pro and FLS980. Measurement of UV-visible absorption spectra was conducted on a spectrometer from HITACHI Instruments (UV-3900H) and Shimadzu UV-2700 spectrometers.

TLC analyses were performed on silica gel plate and column chromatography over silica gel (mesh 200-300). Unless otherwise noted, commercially available solvents and reagents were used without further purification.

## 2. Synthetic Procedure and Characterization Data

### 2.1 Synthesis of compound S2

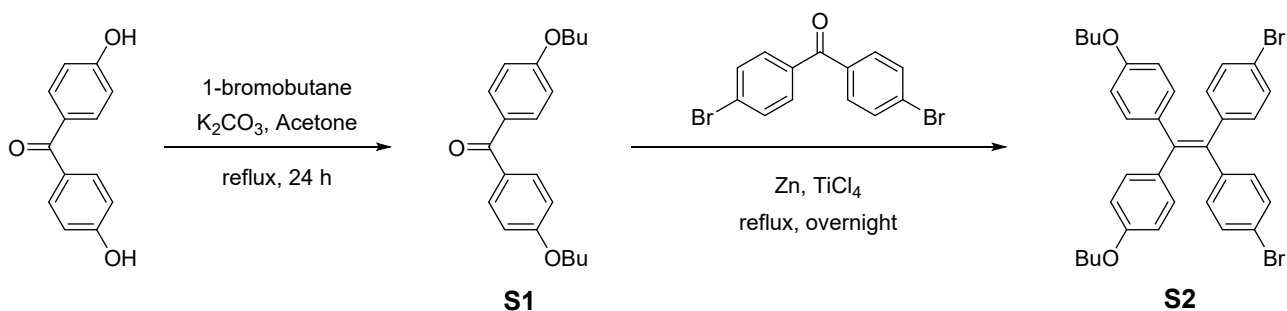

Compound S1 was synthesized according to the previously reported method.<sup>[1]</sup>

A 250 mL two-necked flask equipped with a magnetic stirrer was charged with zinc powder (12.01 g, 184 mmol, 12.0 equiv.) and THF (140 mL) under nitrogen atmosphere. The mixture was cooled to  $-40$  °C, and  $\text{TiCl}_4$  (10.10 mL, 92 mmol, 6.0 equiv.) was added slowly by a syringe. The mixture was refluxed for 2 h and then cooled to room temperature. A THF solution (80 mL) of S1 (5.00 g, 15 mmol, 1.0 equiv.) and 4,4'-dibromobenzophenone (5.21 g, 15 mmol, 1.0 equiv.) was added to the mixture, and the reaction mixture was stirred at reflux overnight. After cooling down to room temperature, saturated  $\text{K}_2\text{CO}_3$  was added and the mixture was filtered. The filtrates were extracted with  $\text{CH}_2\text{Cl}_2$  (200 mL x 3) and the combined organic phase was washed with brine (300 mL x 3). After solvent removal under reduced pressure, the crude product was purified by column chromatography on silica gel using PE /  $\text{CH}_2\text{Cl}_2$  (6:1, v/v) as eluent to afford S2 as light yellow solid (3.75 g, 39 % yield).

S2: Known compound. <sup>[2]</sup>  $^1\text{H}$  NMR (600 MHz,  $\text{CDCl}_3$ )  $\delta$  7.22 (d,  $J = 8.6$  Hz, 4H), 6.88 (broad, 8H), 6.64 (d,  $J = 8.6$  Hz, 4H), 3.90 (t,  $J = 6.6$  Hz, 4H), 1.76 - 1.70 (m, 4H), 1.51-1.44 (m, 4H), 0.97 (t,  $J = 7.4$  Hz, 6H).

$^{13}\text{C}$  NMR (151 MHz,  $\text{CDCl}_3$ )  $\delta$  158.16, 143.02, 141.80, 136.47, 135.53, 133.16, 132.63, 131.12, 120.35, 113.86,

67.68, 31.49, 19.39, 14.03.

**UV/Vis** (CH<sub>2</sub>Cl<sub>2</sub>):  $\lambda_{\max}$  (log  $\epsilon$ ) = 257 (4.48), 302 (4.21) and 333 nm (4.27).

**MS** (MALDI-TOF) m/z: [M]<sup>+</sup> calcd. for C<sub>34</sub>H<sub>34</sub>O<sub>2</sub>Br<sub>2</sub><sup>+</sup>, 632.0920; found, 632.0925.

## 2.2 Synthesis of compound 1

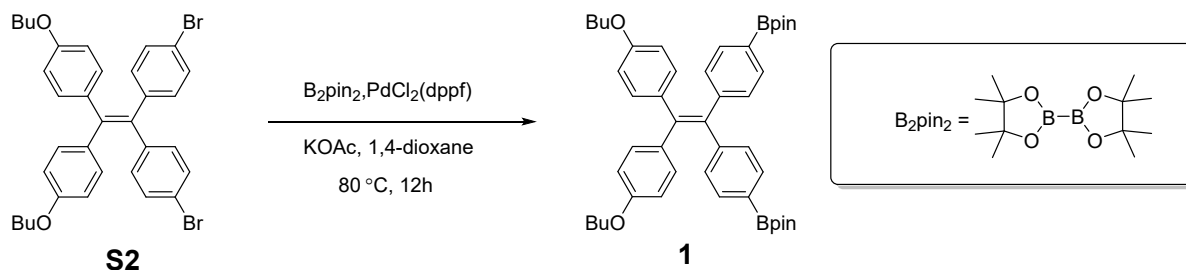

A mixture of compound **S2** (500 mg, 0.78 mmol, 1.0 equiv.), B<sub>2</sub>pin<sub>2</sub> (500 mg, 1.97 mmol, 2.5 equiv.), KOAc (232 mg, 1.97 mmol, 3.0 equiv.), and PdCl<sub>2</sub>(dppf) (35 mg, 0.05 mmol, 6 % equiv.) in anhydrous 1,4-dioxane (20 mL) were heated at 80 °C for 12 h under nitrogen, and then 1,4-dioxane was removed under vacuum, the residue was dissolved in CH<sub>2</sub>Cl<sub>2</sub> washed with water, and dried over anhydrous NaSO<sub>4</sub>. After removing CH<sub>2</sub>Cl<sub>2</sub> under reduced pressure, the crude product was purified by column chromatography on silica gel using PE / CH<sub>2</sub>Cl<sub>2</sub> (1:2, v/v) as eluent to afford **1** as light yellow solid (489 mg, 85 % yield).

**1**: Known compound.<sup>[2]</sup> <sup>1</sup>H NMR (600 MHz, CDCl<sub>3</sub>)  $\delta$  7.52 (d,  $J$  = 7.8 Hz, 4H), 7.00 (d,  $J$  = 7.8 Hz, 4H), 6.90 (d,  $J$  = 8.7 Hz, 4H), 6.60 (d,  $J$  = 8.7 Hz, 4H), 3.88 (t,  $J$  = 6.5 Hz, 4H), 1.77-1.67 (m, 4H), 1.52-1.43 (m, 4H), 1.32 (s, 24H), 0.96 (t,  $J$  = 7.4 Hz, 6H).

<sup>13</sup>C NMR (151 MHz, CDCl<sub>3</sub>)  $\delta$  157.93, 147.47, 141.47, 138.90, 136.09, 134.24, 132.74, 130.97, 113.69, 83.79, 67.57, 31.52, 25.03, 19.40, 14.04.

**UV/Vis** (CH<sub>2</sub>Cl<sub>2</sub>):  $\lambda_{\max}$  (log  $\epsilon$ ) = 257 (4.42), 303 (4.21) and 335 nm (4.23).

**MS** (MALDI-TOF) m/z: [M]<sup>+</sup> calcd. for C<sub>46</sub>H<sub>58</sub>B<sub>2</sub>O<sub>6</sub><sup>+</sup>, 728.4414; found, 728.4415.

## 2.3 Synthesis of [n]CTPEs

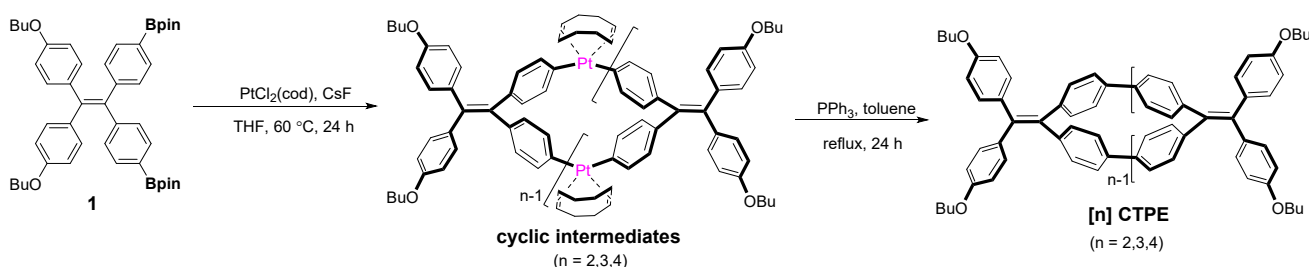

A mixture of **1** (200.0 mg, 0.27 mmol), PtCl<sub>2</sub>(cod) (102.7 mg, 0.27 mmol) and CsF (250.2 mg, 1.64 mmol) in THF (25 ml) was stirred at ambient temperature for 30 min and then heated at 60 °C for 24 h under nitrogen atmosphere. After THF was removed rotary evaporation, the residue was dissolved in CH<sub>2</sub>Cl<sub>2</sub> and was washed with brine, dried over Na<sub>2</sub>SO<sub>4</sub>, and concentrated in vacuo to afford crude product containing the cyclic intermediates. A mixture of crude cyclic intermediates and PPh<sub>3</sub> (1440.0 mg, 4.17 mmol) in toluene (25 ml) was refluxed for 24 h under nitrogen atmosphere. After cooling down to room temperature, toluene was removed under vacuum. The residue was dissolved in CH<sub>2</sub>Cl<sub>2</sub> (30 mL) and washed with brine (30 mL x 3). After dried

over anhydrous  $\text{Na}_2\text{SO}_4$ , the organic layer was concentrated and then passed through a short silica gel column to afford a crude mixture, which was subjected to recycling preparative GPC-HPLC. [2]CTPE, [3]CTPE and [4]CTPE were collected separately as yellow solutions. Further purification by silica gel column chromatography and recrystallization from  $\text{CH}_2\text{Cl}_2/n$ -hexane gave pure [2]CTPE, [3]CTPE and [4]CTPE.

[2]CTPE, White solid, 20.7 mg, yield 15.9 %;

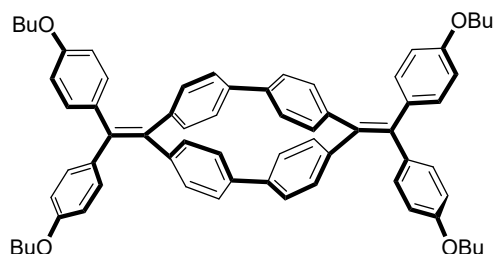

$^1\text{H NMR}$  (600 MHz,  $\text{CDCl}_3$ )  $\delta$  7.38 (d,  $J = 8.9$  Hz, 8H), 6.96 (d,  $J = 8.5$  Hz, 8H), 6.90 (d,  $J = 8.5$  Hz, 8H), 6.76 (d,  $J = 8.9$  Hz, 8H), 3.91 (t,  $J = 6.5$  Hz, 8H), 1.76-1.69 (m, 8H), 1.50-1.42 (m, 8H), 0.95 (t,  $J = 7.4$  Hz, 12H).

$^{13}\text{C NMR}$  (151 MHz,  $\text{CDCl}_3$ )  $\delta$  158.16, 148.90, 139.59, 138.80, 134.72, 133.96, 131.78, 130.06, 126.86, 113.73, 67.64, 31.49, 19.39, 13.99.

UV/Vis (THF):  $\lambda_{\text{max}}$  ( $\log \epsilon$ ) = 252 (4.48), 288 (4.86) and 324 nm (4.66).

MS (MALDI-TOF):  $[\text{M}]^+$  calcd. for  $\text{C}_{68}\text{H}_{68}\text{O}_4^+$ , 948.5112; found, 948.5111.

[3]CTPE, White solid, 12.9 mg, yield 9.9 %;

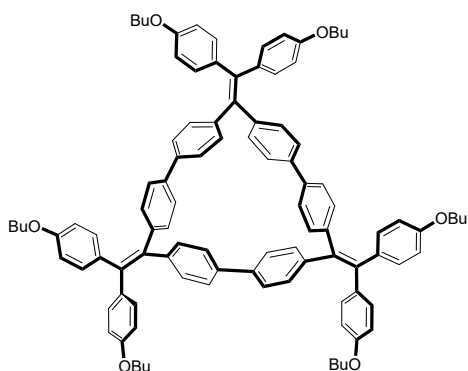

$^1\text{H NMR}$  (600 MHz,  $\text{CDCl}_3$ )  $\delta$  7.17 (d,  $J = 8.9$  Hz, 12H), 7.13 (d,  $J = 8.4$  Hz, 12H), 6.88 (d,  $J = 8.4$  Hz, 12H), 6.69 (d,  $J = 8.9$  Hz, 12H), 3.87 (t,  $J = 6.5$  Hz, 12H), 1.74-1.67 (m, 12H), 1.48-1.40 (m, 12H), 0.93 (t,  $J = 7.4$  Hz, 18H).

$^{13}\text{C NMR}$  (151 MHz,  $\text{CDCl}_3$ )  $\delta$  157.87, 144.13, 139.35, 137.97, 137.56, 134.62, 132.10, 129.66, 127.14, 113.64, 67.59, 31.51, 19.39, 14.00.

UV/Vis (THF):  $\lambda_{\text{max}}$  ( $\log \epsilon$ ) = 255 (4.89) and 317 nm (4.88).

MS (MALDI-TOF):  $[\text{M}]^+$  calcd. for  $\text{C}_{102}\text{H}_{102}\text{O}_6^+$ , 1422.7671; found, 1422.7663.

[4]CTPE-2OBu, yellow solid, 5.8 mg, yield 4.5 %;



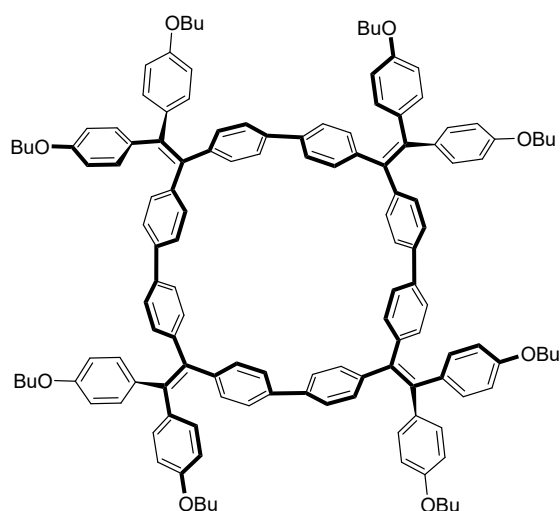

**<sup>1</sup>H NMR** (600 MHz, CDCl<sub>3</sub>) δ 7.30 (d, *J* = 8.4 Hz, 16H), 7.06 (d, *J* = 8.8 Hz, 16H), 6.87 (d, *J* = 8.4 Hz, 16H), 6.65 (d, *J* = 8.8 Hz, 16H), 3.88 (t, *J* = 6.5 Hz, 16H), 1.77-1.68 (m, 16H), 1.50-1.42 (m, 16H), 0.95 (t, *J* = 7.4 Hz, 24H).

**<sup>13</sup>C NMR** (151 MHz, CDCl<sub>3</sub>) δ 158.04, 144.61, 138.99, 138.25, 136.94, 135.51, 132.70, 131.73, 125.77, 113.69, 67.61, 31.52, 19.40, 14.01.

**UV/Vis** (THF): λ<sub>max</sub> (log ε) = 262 (5.03) and 356 nm (5.10).

**MS** (MALDI-TOF) : [M]<sup>+</sup> calcd. for C<sub>136</sub>H<sub>137</sub>O<sub>8</sub><sup>+</sup>, 1898.0308; found, 1898.0313.

#### 2.4 Synthesis of compound **S3**

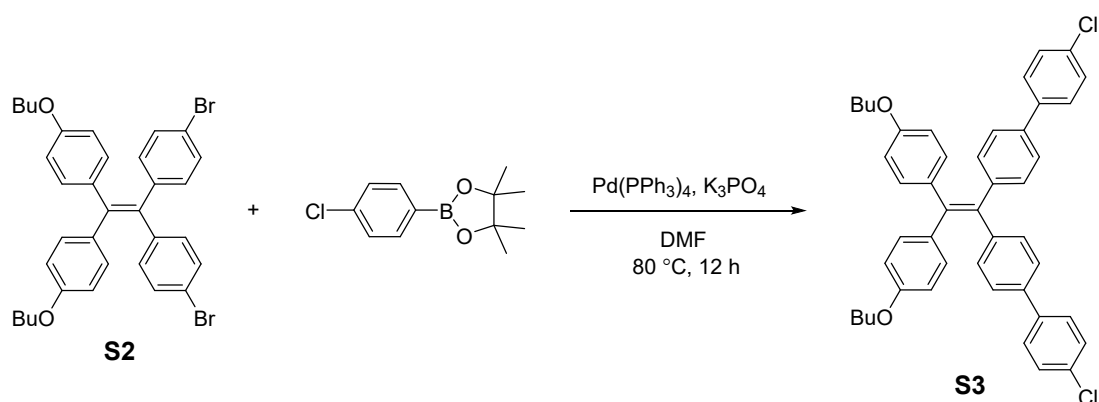

To a 50 mL Schlenk flask charged with a magnetic stir bar, **S2** (400 mg, 0.63 mmol, 1.0 equiv), 4-chlorophenylboronic acid pinacol ester (301 mg, 1.26 mmol, 2.0 equiv), Pd(PPh<sub>3</sub>)<sub>4</sub> (73 mg, 0.06 mmol, 0.1 equiv), and K<sub>3</sub>PO<sub>4</sub> (803 mg, 3.78 mmol, 6.0 equiv) were added. The vessel was sealed with a rubber septum and evacuated/backfilled with N<sub>2</sub> (3 times) before adding DMF (15 mL) under N<sub>2</sub> atmosphere. The bright yellow reaction mixture was heated to 80 °C and stirred at this temperature for 12 h. The reaction mixture was then cooled down to room temperature and diluted with DCM (50 mL). The organic layer was washed with water (40 mL×5), dried over anhydrous Na<sub>2</sub>SO<sub>4</sub>, and concentrated. Further purification by silica gel column chromatography (PE / DCM, v/v = 3:1) afforded compound **S3** as light-yellow solid (367 mg, 83 % yield).

**S3**: **<sup>1</sup>H NMR** (600 MHz, CDCl<sub>3</sub>) δ 7.49 (d, *J* = 8.6 Hz, 4H), 7.37 (d, *J* = 8.6 Hz, 4H), 7.33 (d, *J* = 8.0 Hz, 4H), 7.11 (broad, 4H), 6.97 (d, *J* = 8.0 Hz, 4H), 6.65 (d, *J* = 8.8 Hz, 4H), 3.89 (t, *J* = 6.5 Hz, 4H), 1.77 -1.69 (m, 4H), 1.51-1.42 (m, 4H), 0.96 (t, *J* = 7.4 Hz, 6H).

$^{13}\text{C}$  NMR (151 MHz,  $\text{CDCl}_3$ )  $\delta$  157.99, 143.91, 141.20, 139.31, 137.41, 136.18, 133.27, 132.77, 132.15, 128.97, 128.21, 126.26, 113.77, 67.67, 31.51, 19.40, 14.03.

UV/Vis ( $\text{CH}_2\text{Cl}_2$ ):  $\lambda_{\text{max}}$  ( $\log \epsilon$ ) = 265 (4.64) and 335 nm (4.45).

MS (MALDI-TOF):  $[\text{M}]^+$  calcd. for  $\text{C}_{46}\text{H}_{42}\text{O}_2\text{Cl}_2^+$ , 696.2556; found, 696.2562.

## 2.5 Synthesis of compound 2

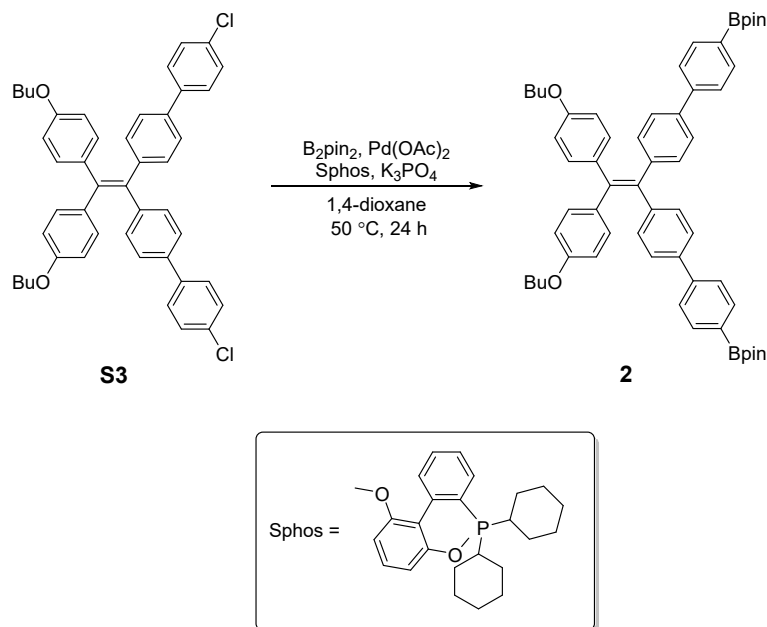

To a 50 mL schlenk flask were added **S3** (300 mg, 0.43 mmol, 1 equiv),  $\text{B}_2\text{pin}_2$  (655 mg, 2.58 mmol, 6 equiv),  $\text{Pd}(\text{OAc})_2$  (6 mg, 0.026 mmol, 6% equiv),  $\text{K}_3\text{PO}_4$  (548 mg, 2.58 mmol, 6 equiv) and Sphos (21 mg, 0.052 mmol, 12% equiv). The flask was degassed and purged with  $\text{N}_2$  for three cycles. Then anhydrous 1,4-dioxane (10 mL) was added through a syringe under  $\text{N}_2$  atmosphere. The mixture was stirred at  $50\text{ }^\circ\text{C}$  for 24 h. The solvent was removed and the residue was dissolved in 30 mL  $\text{CH}_2\text{Cl}_2$ . The solution was washed with brine (30 mL x 3) and then dried over anhydrous  $\text{Na}_2\text{SO}_4$ . After removing the organic solvent under reduced pressure, the crude product was purified by silica gel column chromatography using dichloromethane as eluent to afford compound **2** as Light yellow solid (310 mg, 82 % yield).

**2**:  $^1\text{H}$  NMR (600 MHz,  $\text{CDCl}_3$ )  $\delta$  7.85 (d,  $J = 8.0$  Hz, 4H), 7.58 (d,  $J = 8.4$  Hz, 4H), 7.40 (d,  $J = 8.4$  Hz, 4H), 7.12 (d,  $J = 8.0$  Hz, 4H), 6.98 (d,  $J = 8.8$  Hz, 4H), 6.65 (d,  $J = 8.8$  Hz, 4H), 3.89 (t,  $J = 6.5$  Hz, 4H), 1.78 – 1.69 (m, 4H), 1.52 – 1.43 (m, 4H), 1.36 (s, 24H), 0.96 (t,  $J = 7.4$  Hz, 6H).

$^{13}\text{C}$  NMR (151 MHz,  $\text{CDCl}_3$ )  $\delta$  157.93, 143.92, 143.57, 140.98, 138.40, 136.29, 135.32, 132.78, 132.07, 126.50, 126.25, 113.76, 83.92, 67.64, 31.51, 25.03, 19.39, 14.03.

UV/Vis ( $\text{CH}_2\text{Cl}_2$ ):  $\lambda_{\text{max}}$  ( $\log \epsilon$ ) = 265 (4.66) and 327 nm (4.55).

MS (MALDI-TOF):  $[\text{M}]^+$  calcd. for  $\text{C}_{58}\text{H}_{66}\text{B}_2\text{O}_6^+$ , 880.5040; found, 880.5049.

## 2.6 Synthesis of [n]CHPEs

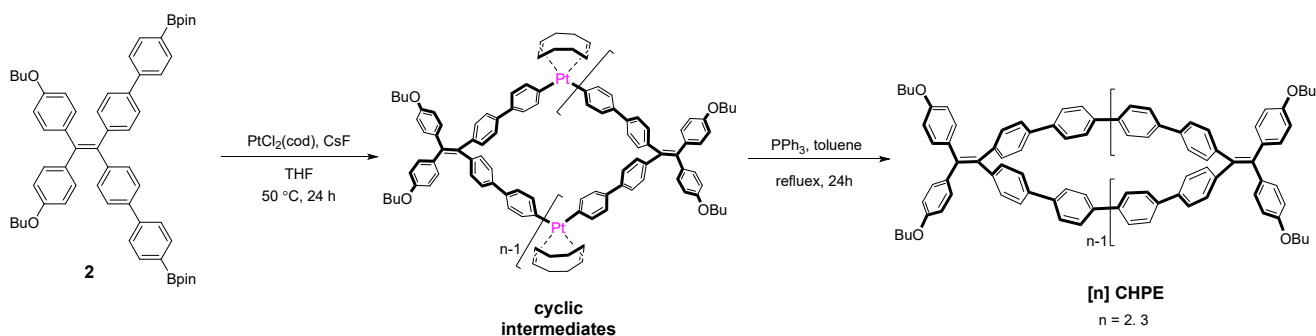

A mixture of **2** (200.0 mg, 0.23 mmol), PtCl<sub>2</sub>(cod) (85.0 mg, 0.23 mmol) and CsF (207.0 mg, 1.36 mmol) in THF (25 ml) was heated at 60 °C for 24 h under N<sub>2</sub> atmosphere. After completion of reaction THF was removed under vacuum, the residue was dissolved in CH<sub>2</sub>Cl<sub>2</sub> and was washed with brine, dried over anhydrous Na<sub>2</sub>SO<sub>4</sub>, and concentrated in vacuo to afford the cyclic intermediates. The crude cyclic intermediates and PPh<sub>3</sub> (1191.0 mg, 4.5 mmol) in toluene (25 ml) and the mixture was stirred at ambient temperature for 30 min and then at reflux for 24 h. After the mixture cooled down to room temperature, toluene was removed under vacuum. The residue was dissolved in CH<sub>2</sub>Cl<sub>2</sub> (30 mL) and washed with brine (30 mL x 3). After dried over anhydrous sodium sulfate, the organic layer was concentrated and then passed through a short silica gel column to afford a crude mixture, which was subjected to recycling preparative GPC-HPLC. **[2]CHPE** and **[3]CHPE** were separately collected as a yellow solutions. Further purification by silica gel column chromatography and recrystallization from CH<sub>2</sub>Cl<sub>2</sub>/*n*-hexane gave pure **[2]CHPE** and **[3]CHPE**.

**[2]CHPE**, white solid, 21.6 mg, yield 15.2 %;

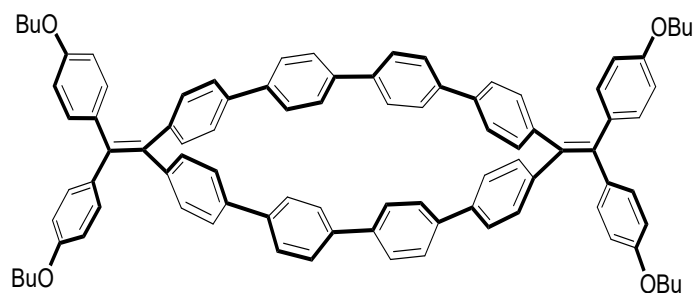

<sup>1</sup>H NMR (600 MHz, CDCl<sub>3</sub>) δ 7.51 (d, *J* = 8.5 Hz, 8H), 7.38 (d, *J* = 8.5 Hz, 8H), 7.22 (d, *J* = 8.8 Hz, 8H), 7.17 (d, *J* = 8.4 Hz, 8H), 6.88 (d, *J* = 8.4 Hz, 8H), 6.73 (d, *J* = 8.8 Hz, 8H), 3.90 (t, *J* = 6.5 Hz, 8H), 1.76 -1.68 (m, 8H), 1.49-1.43 (m, 8H), 0.95 (t, *J* = 7.4 Hz, 12H).

<sup>13</sup>C NMR (151 MHz, CDCl<sub>3</sub>) δ 158.02, 144.74, 139.83, 139.02, 137.90, 137.68, 137.29, 134.55, 132.29, 130.12, 127.68, 127.29, 126.72, 113.70, 68.73, 32.35, 20.83, 13.45.

UV/Vis (THF): λ<sub>max</sub> (log ε) = 258 (4.73) and 337 nm (5.00).

MS (MALDI-TOF): [M]<sup>+</sup> calcd. for C<sub>92</sub>H<sub>84</sub>O<sub>4</sub><sup>+</sup>, 1252.6364; found, 1252.6357.

**[3] CHPE**, yellow solid, 7.4 mg, yield 5.2 %

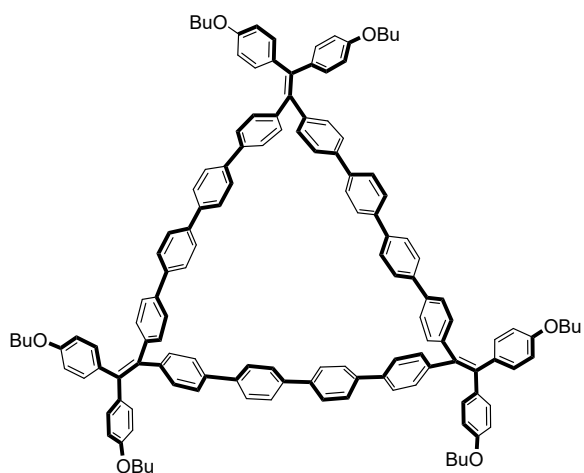

**$^1\text{H}$  NMR** (600 MHz,  $\text{CDCl}_3$ )  $\delta$  7.61 (d,  $J = 8.6$  Hz, 12H), 7.58 (d,  $J = 8.6$  Hz, 12H), 7.34 (d,  $J = 8.4$  Hz, 12H), 7.12 (d,  $J = 8.9$  Hz, 12H), 6.96 (d,  $J = 8.4$  Hz, 12H), 6.71 (d,  $J = 8.9$  Hz, 12H), 3.90 (t,  $J = 6.5$  Hz, 12H), 1.76-1.70 (m, 12H), 1.50-1.43 (m, 12H), 0.95 (t,  $J = 7.4$  Hz, 18H).

**$^{13}\text{C}$  NMR** (151 MHz,  $\text{CDCl}_3$ )  $\delta$  158.04, 144.71, 139.65, 139.12, 139.09, 138.35, 137.58, 135.53, 132.69, 131.62, 127.26, 127.21, 126.44, 113.77, 67.65, 31.53, 19.41, 14.02.

**UV/Vis** (THF):  $\lambda_{\text{max}}$  ( $\log \epsilon$ ) = 263 (4.91) and 352 nm (5.19).

**MS** (MALDI-TOF):  $[\text{M}]^+$  calcd. for  $\text{C}_{138}\text{H}_{126}\text{O}_4^+$ , 1878.9549; found, 1878.9546.

### 3. NMR spectra

#### 3.1 $^1\text{H}$ and $^{13}\text{C}$ NMR spectra

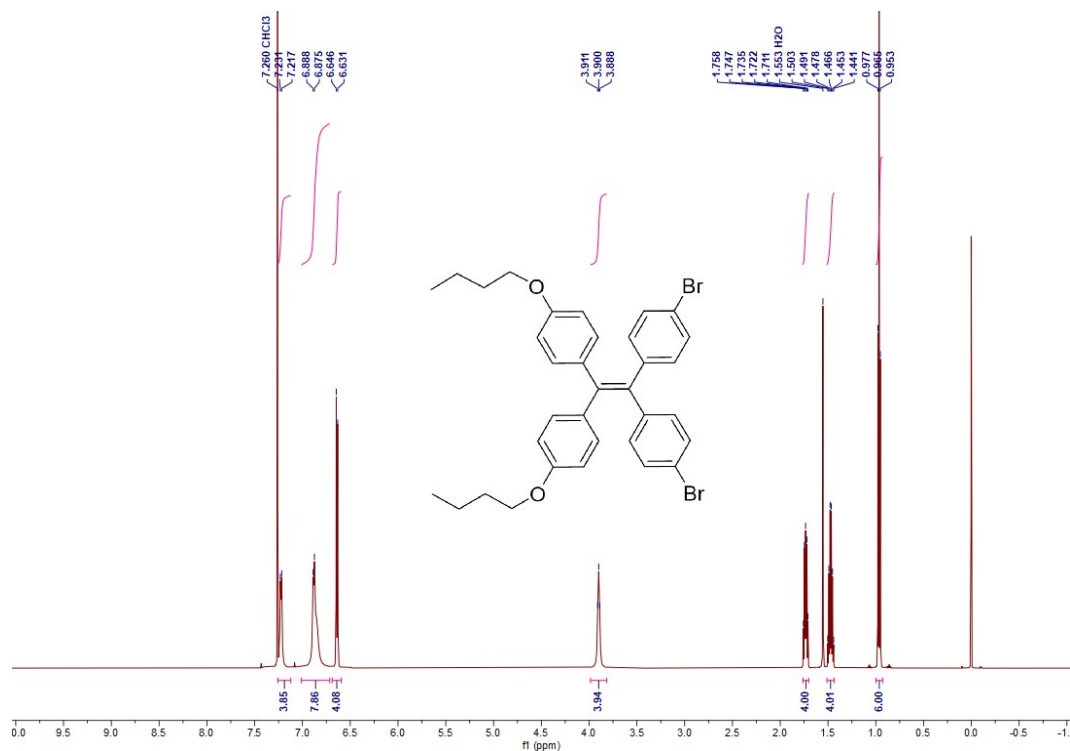

Figure S1.  $^1\text{H}$  NMR (600 MHz,  $\text{CDCl}_3$ ) spectrum of compound S2.

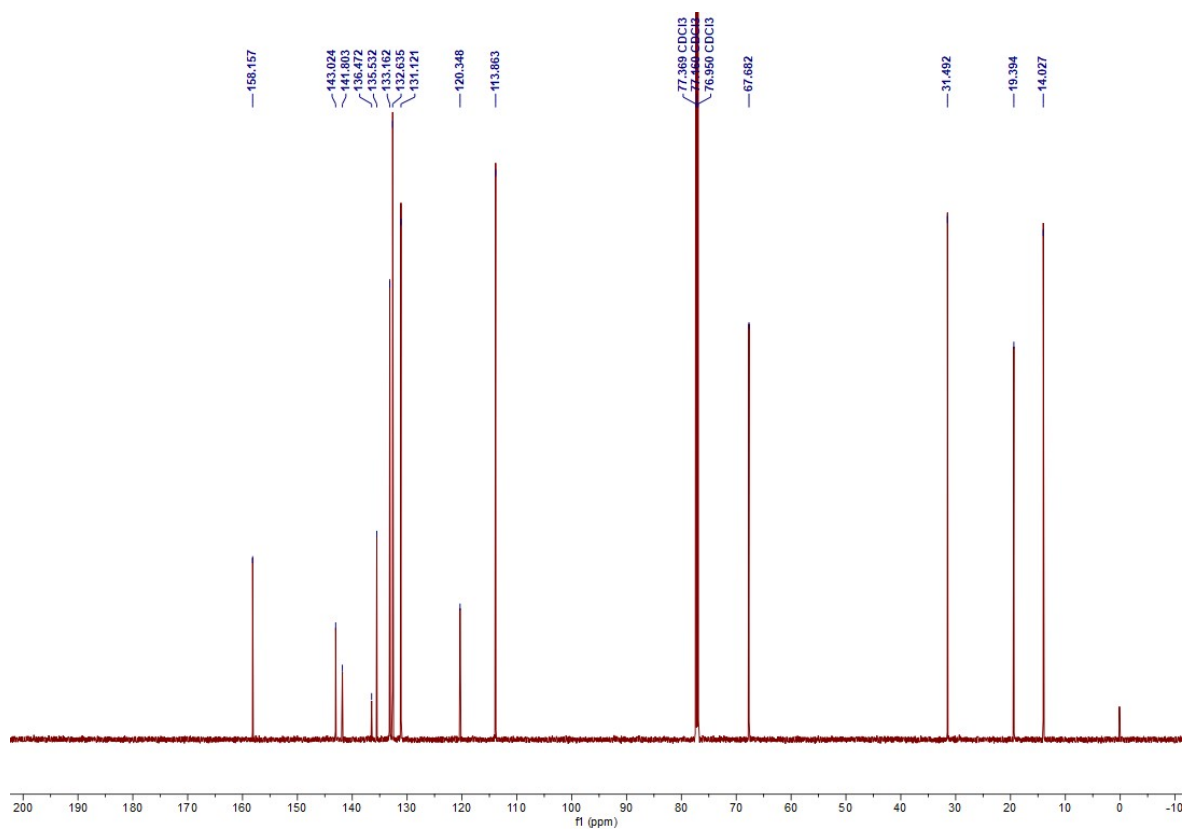

Figure S2.  $^{13}\text{C}$  NMR (151 MHz,  $\text{CDCl}_3$ ) spectrum of compound S2.

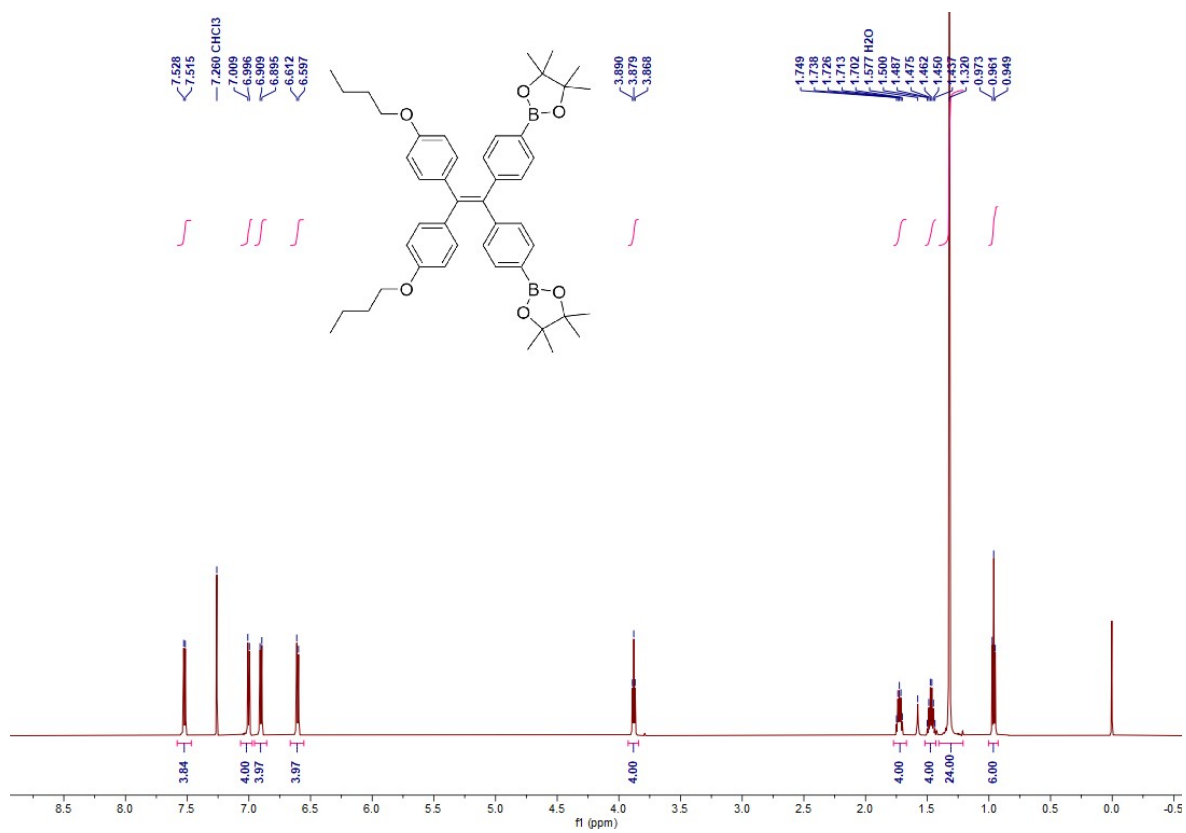

Figure S3.  $^1\text{H}$  NMR (600 MHz,  $\text{CDCl}_3$ ) spectrum of compound 1.

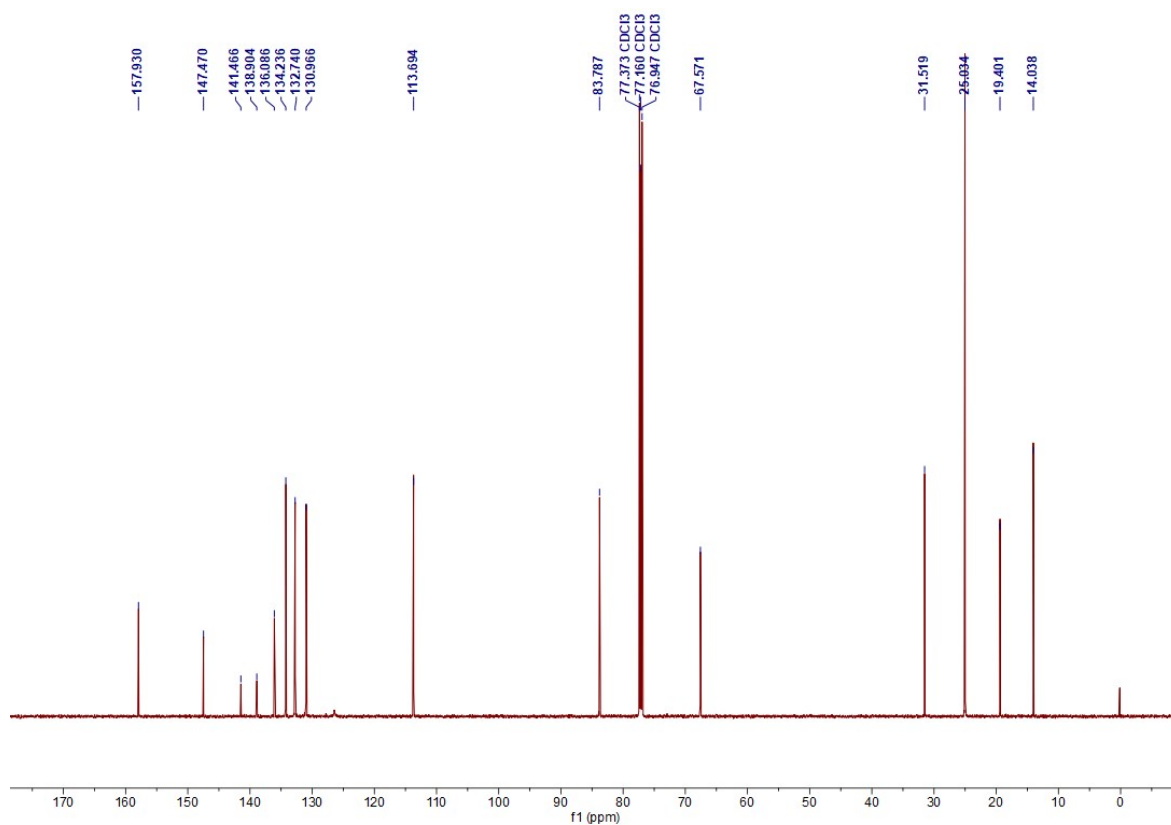

Figure S4. <sup>13</sup>C NMR (151 MHz, CDCl<sub>3</sub>) spectrum of compound 1.

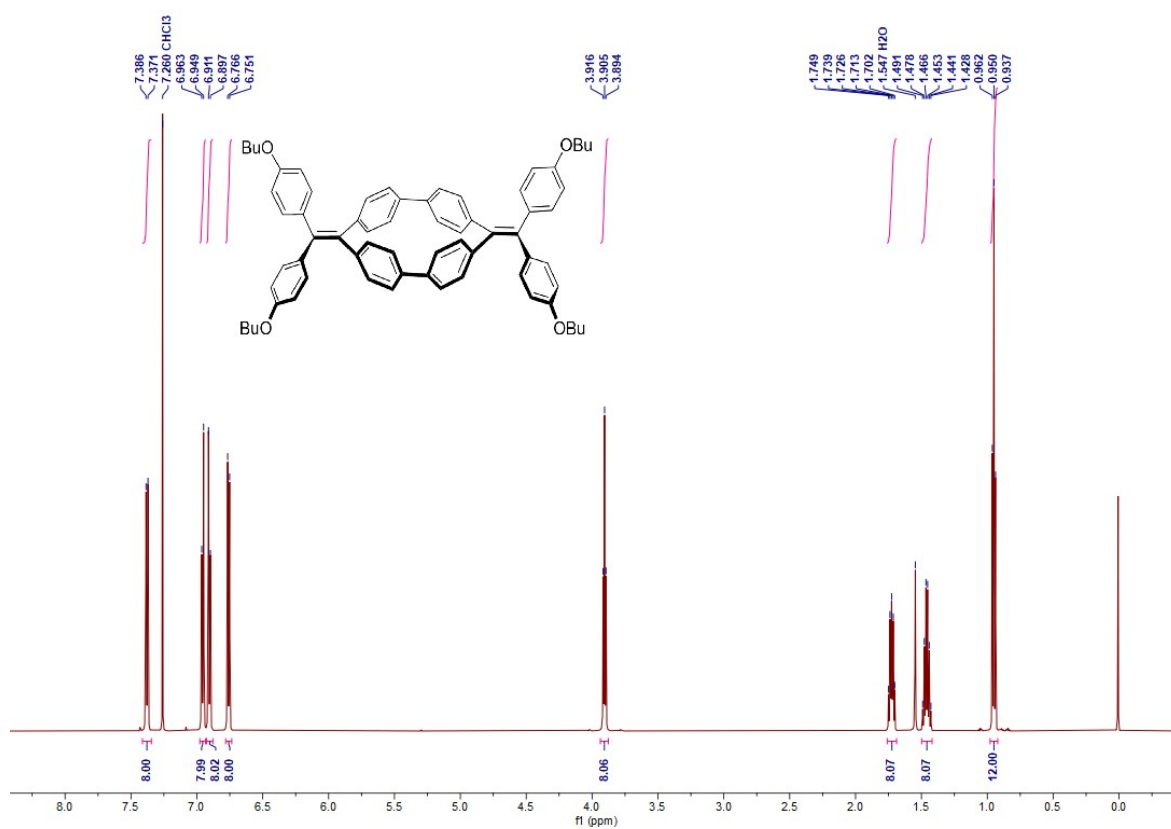

Figure S5. <sup>1</sup>H NMR (600 MHz, CDCl<sub>3</sub>) spectrum of compound [2]CTPE.

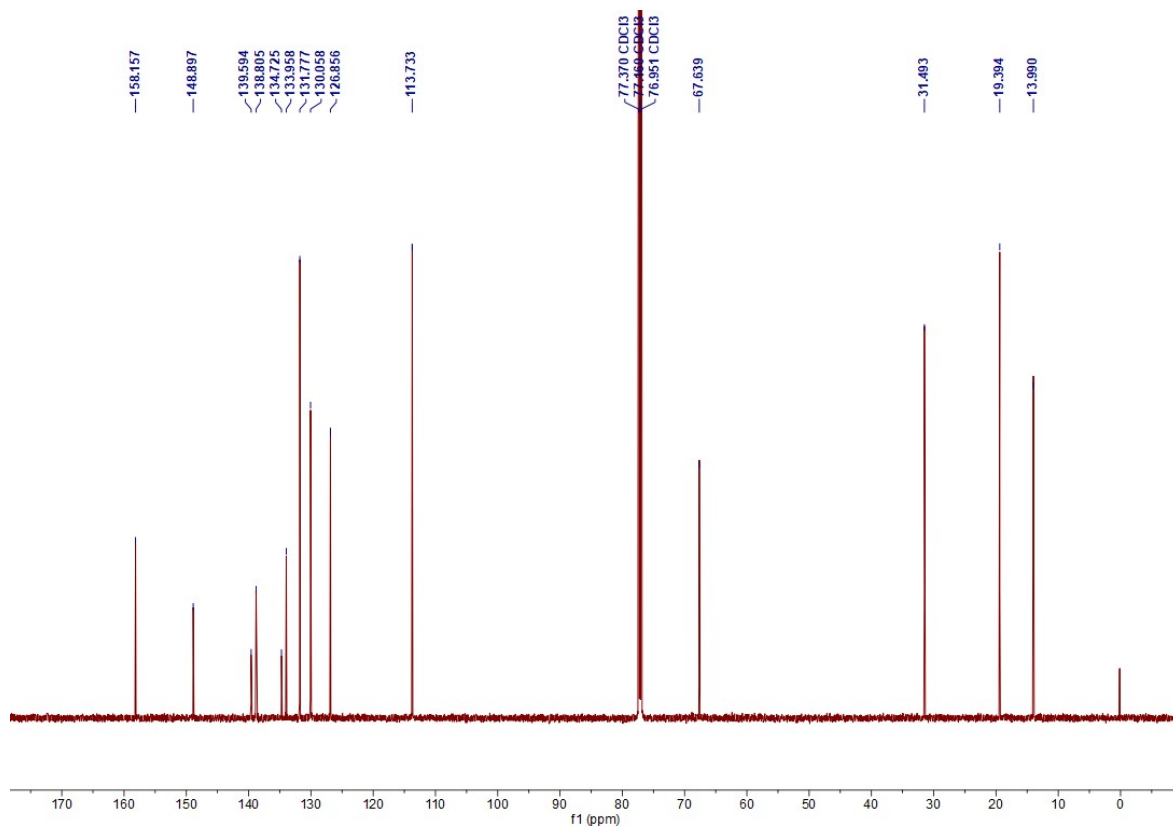

Figure S6.  $^{13}\text{C}$  NMR (151 MHz,  $\text{CDCl}_3$ ) of spectrum compound [2]CTPE.

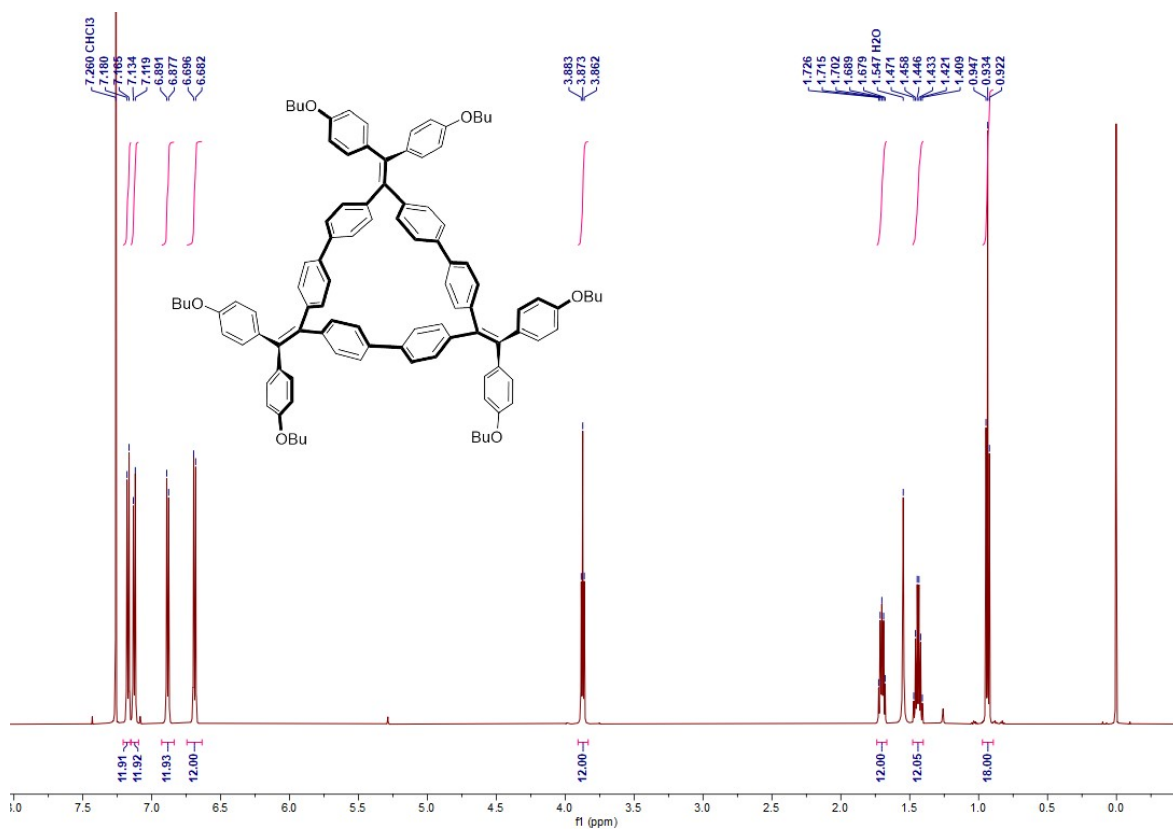

Figure S7.  $^1\text{H}$  NMR (600 MHz,  $\text{CDCl}_3$ ) spectrum of compound [3]CTPE.

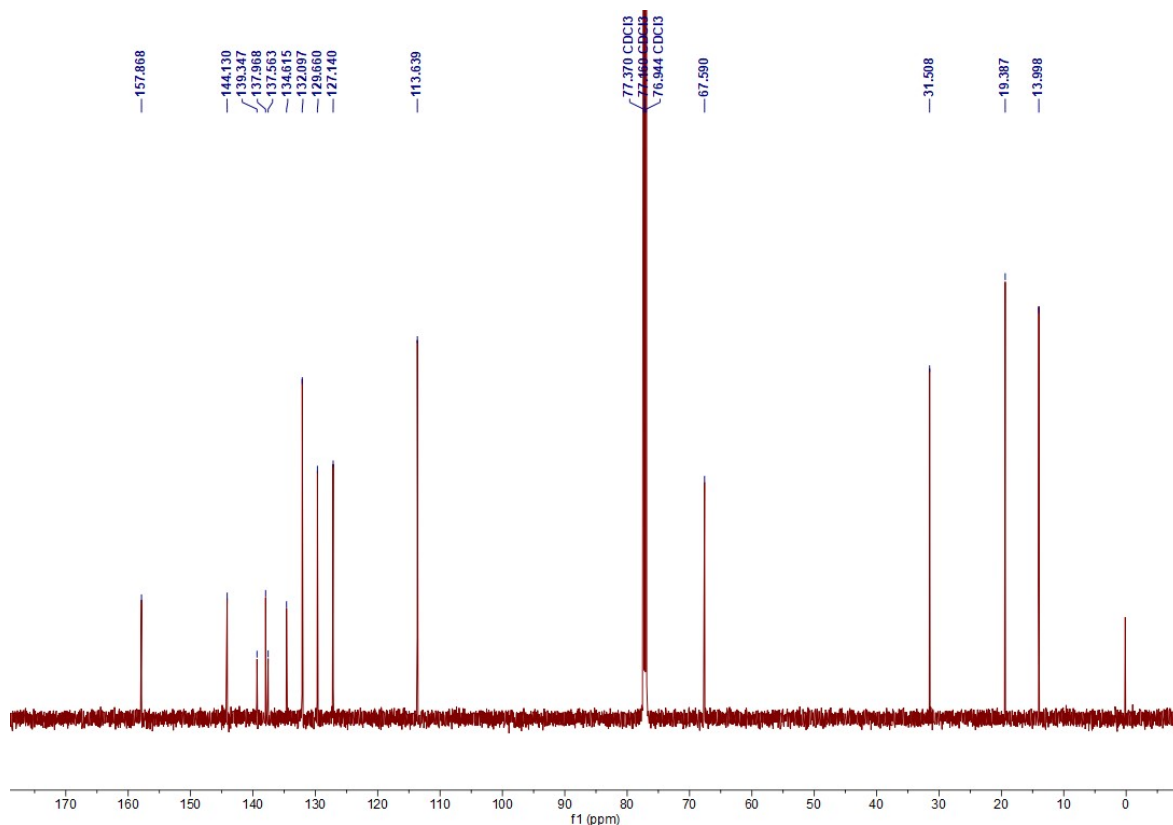

Figure S8.  $^{13}\text{C}$  NMR (151 MHz,  $\text{CDCl}_3$ ) spectrum of compound [3]CTPE.

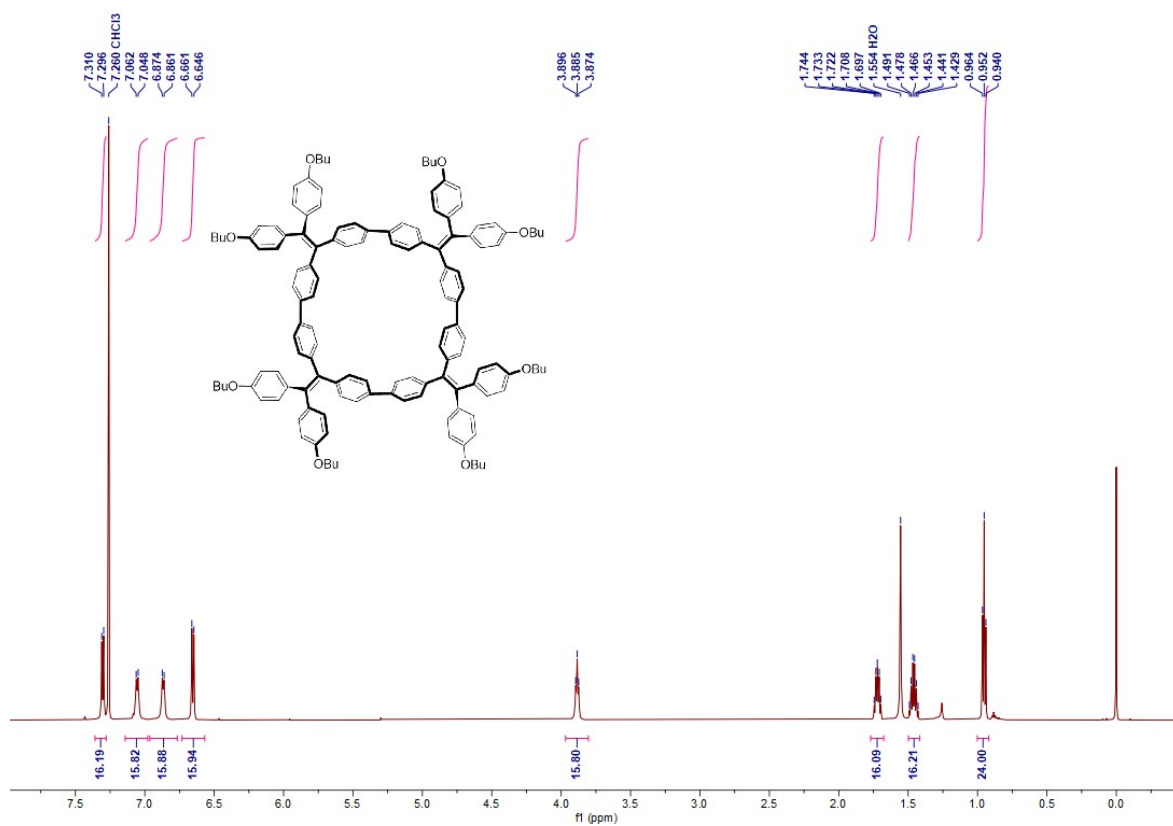

Figure S9.  $^1\text{H}$  NMR (600 MHz,  $\text{CDCl}_3$ ) spectrum of compound [4]CTPE.



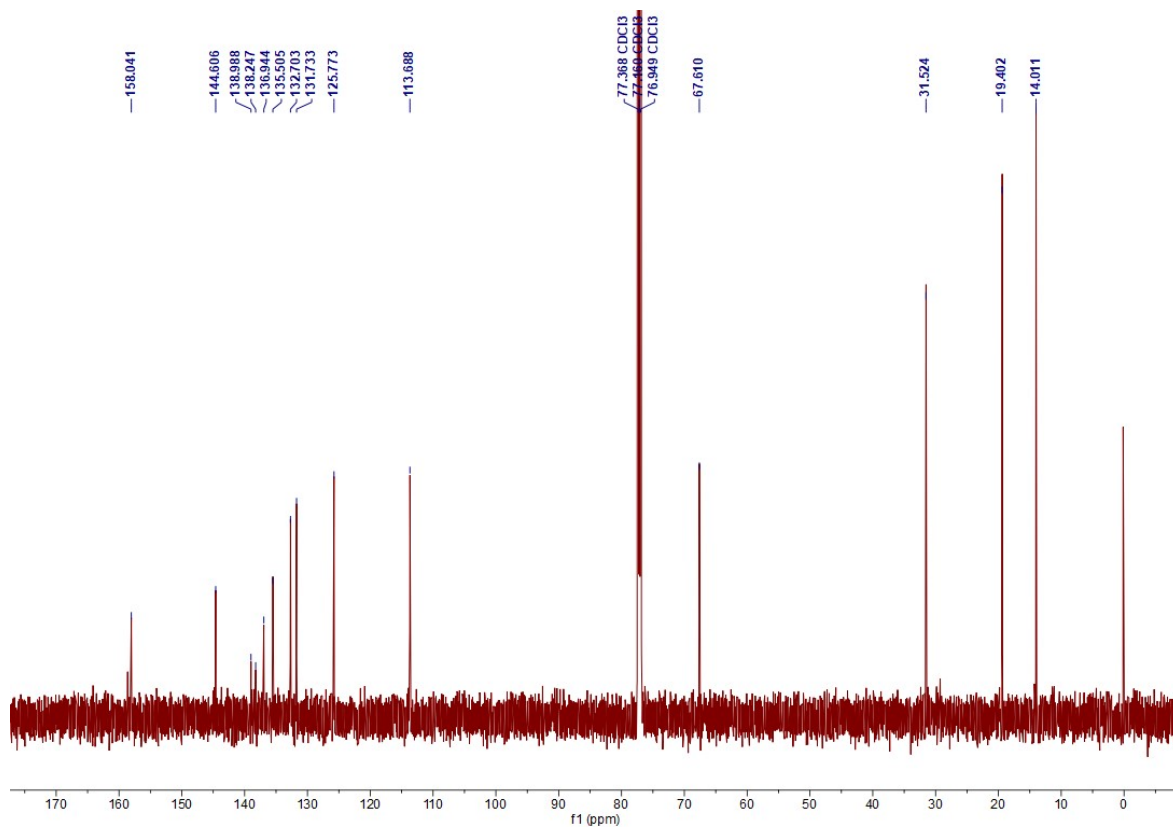

Figure S10.  $^{13}\text{C}$  NMR (151 MHz,  $\text{CDCl}_3$ ) spectrum of compound [4]CTPE.

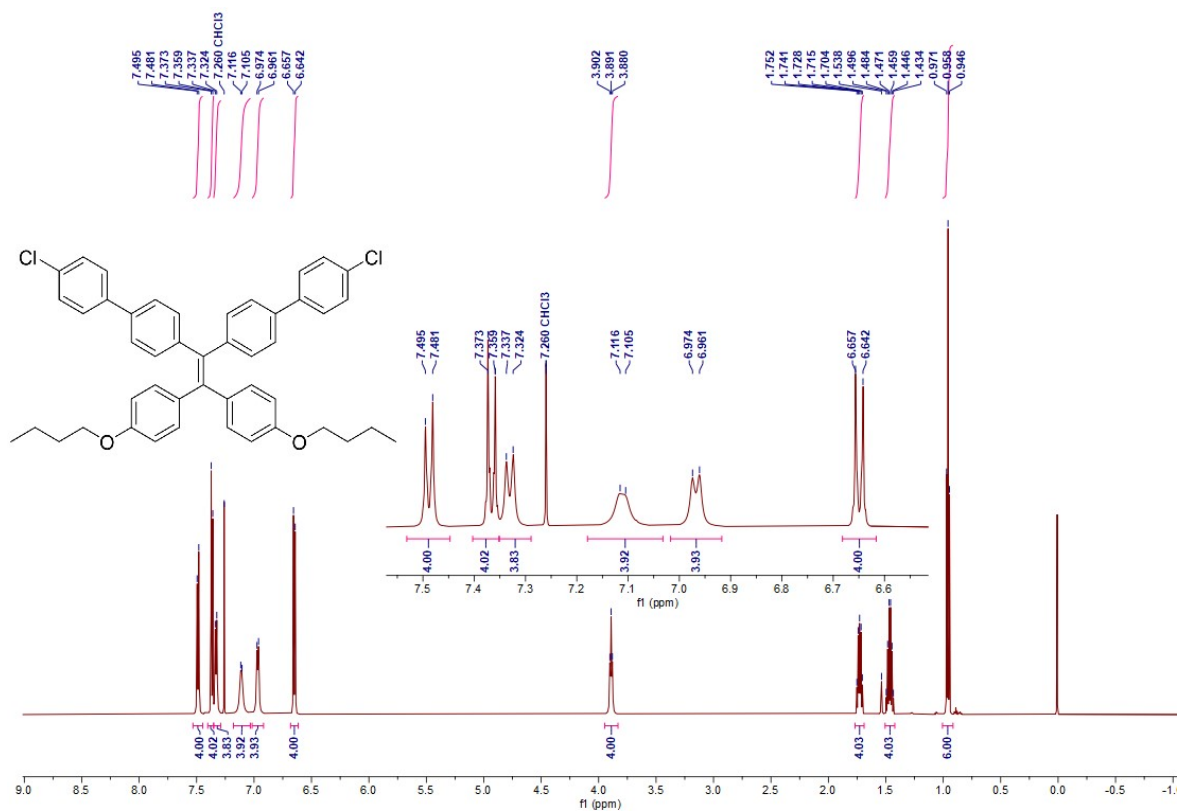

Figure S11.  $^1\text{H}$  NMR spectrum of compound S3 (600 MHz,  $\text{CDCl}_3$ ).

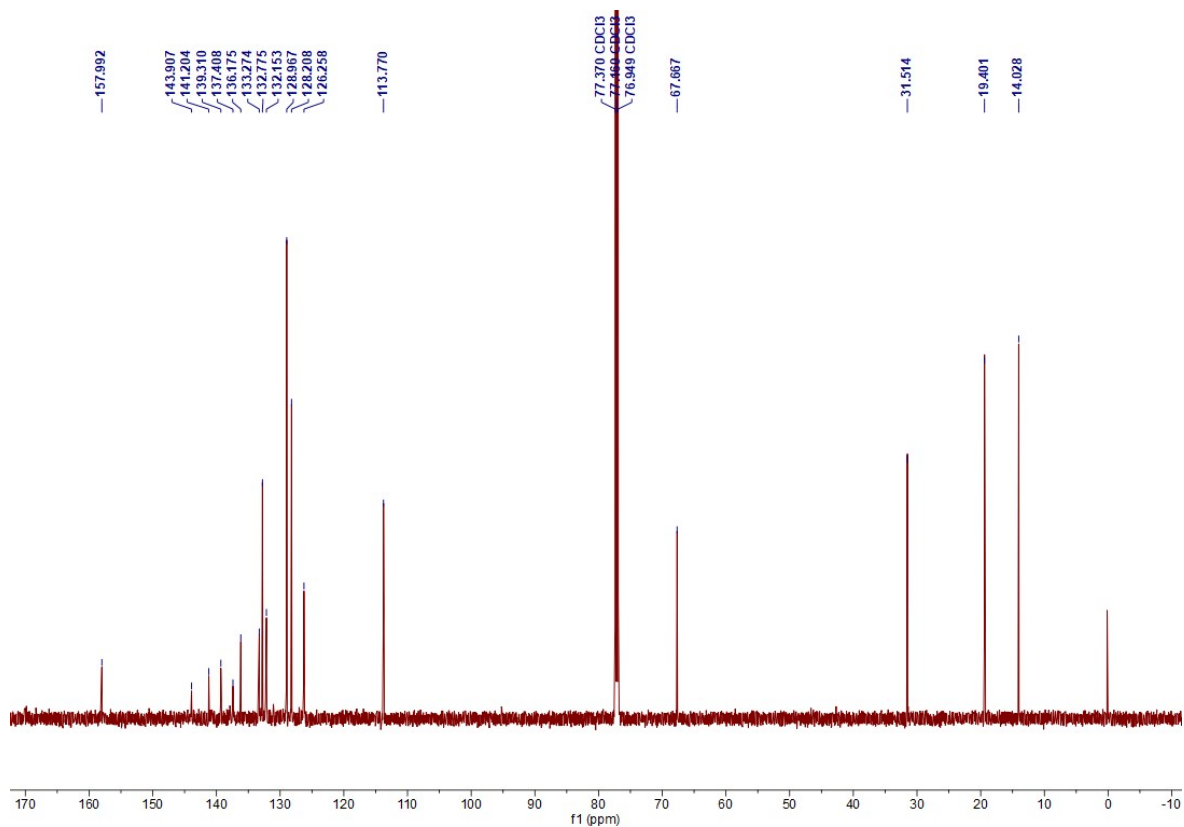

Figure S12. <sup>13</sup>C NMR spectrum of compound S3 (151 MHz, CDCl<sub>3</sub>).

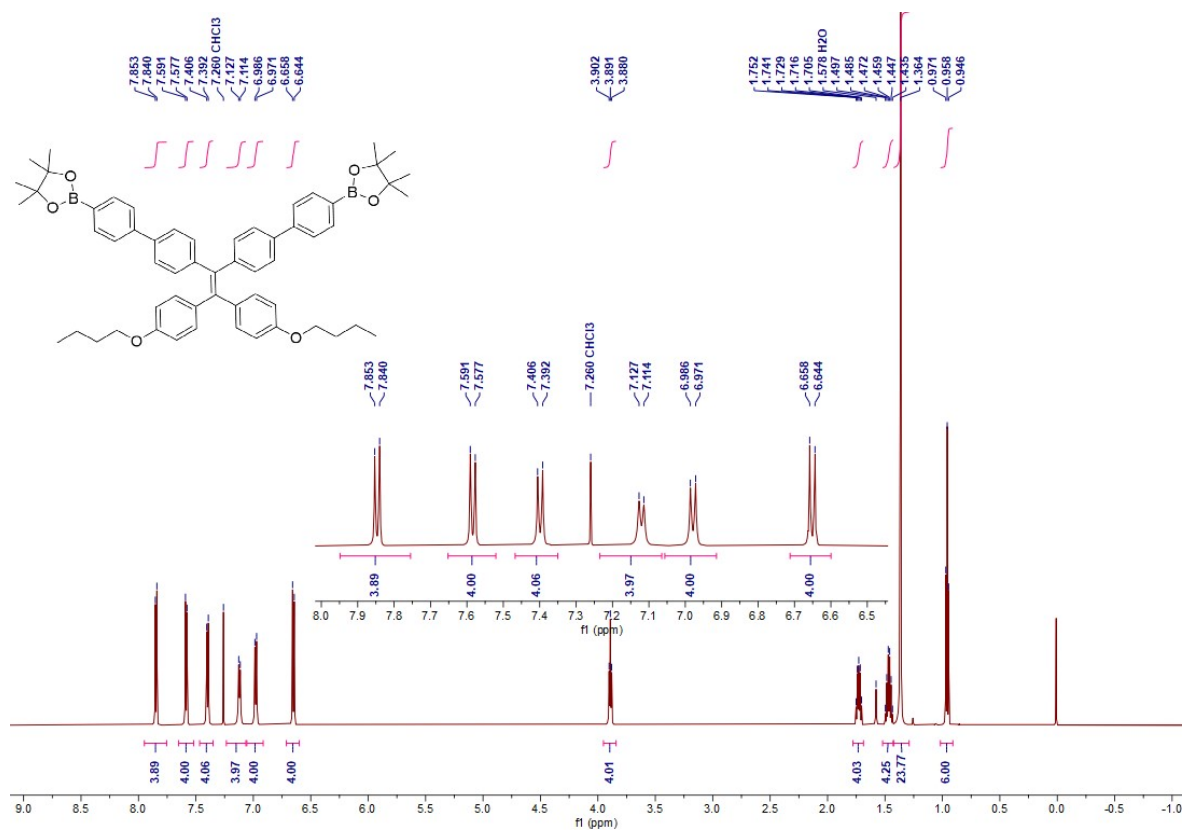

Figure S13. <sup>1</sup>H NMR spectrum of compound 2 (600 MHz, CDCl<sub>3</sub>).

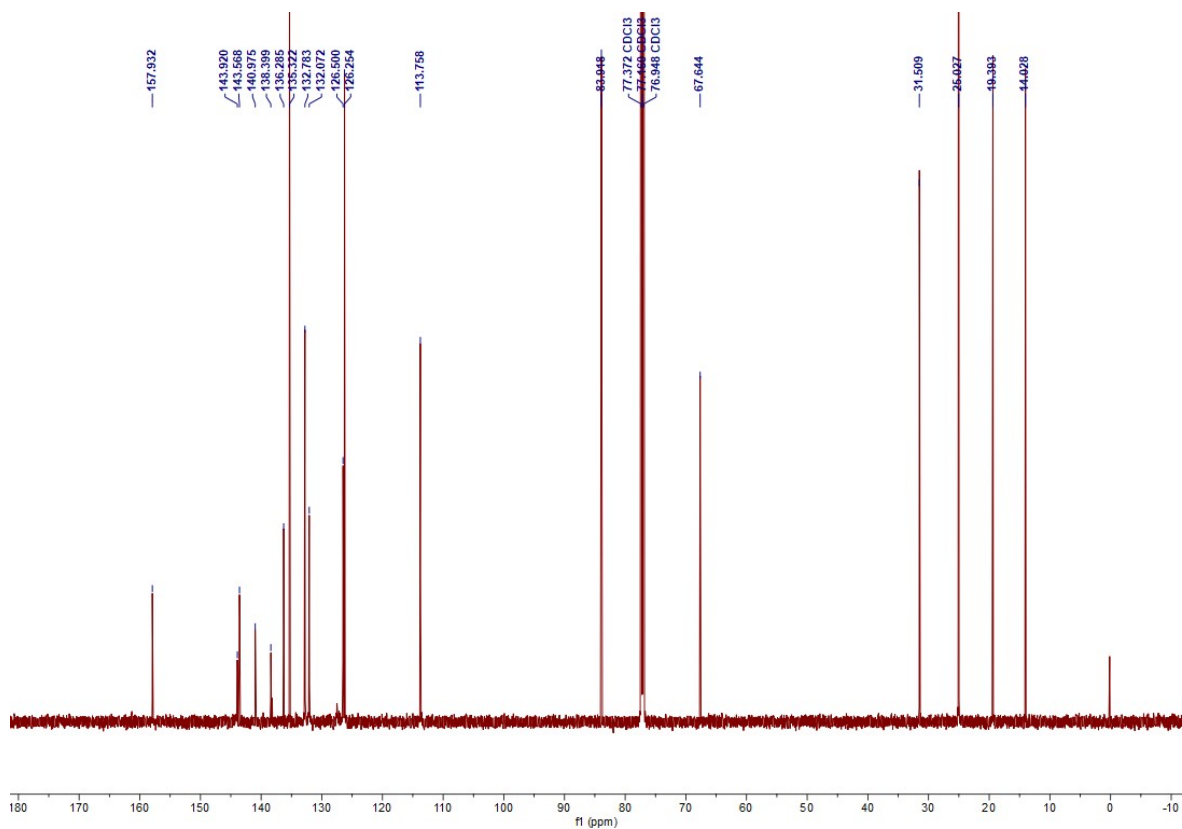

Figure S14. <sup>13</sup>C NMR spectrum of compound **2** (151 MHz, CDCl<sub>3</sub>).

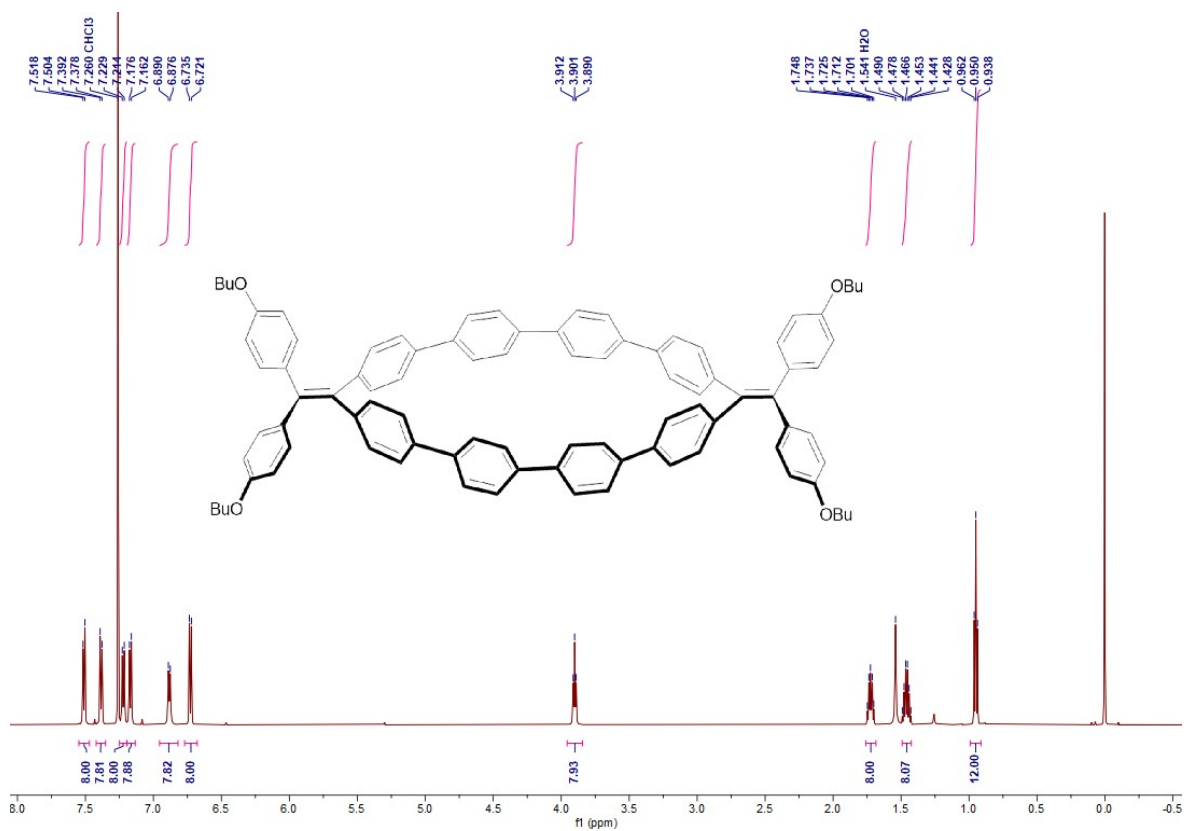

Figure S15. <sup>1</sup>H NMR spectrum of compound **[2]CHPE** (600 MHz, CDCl<sub>3</sub>).

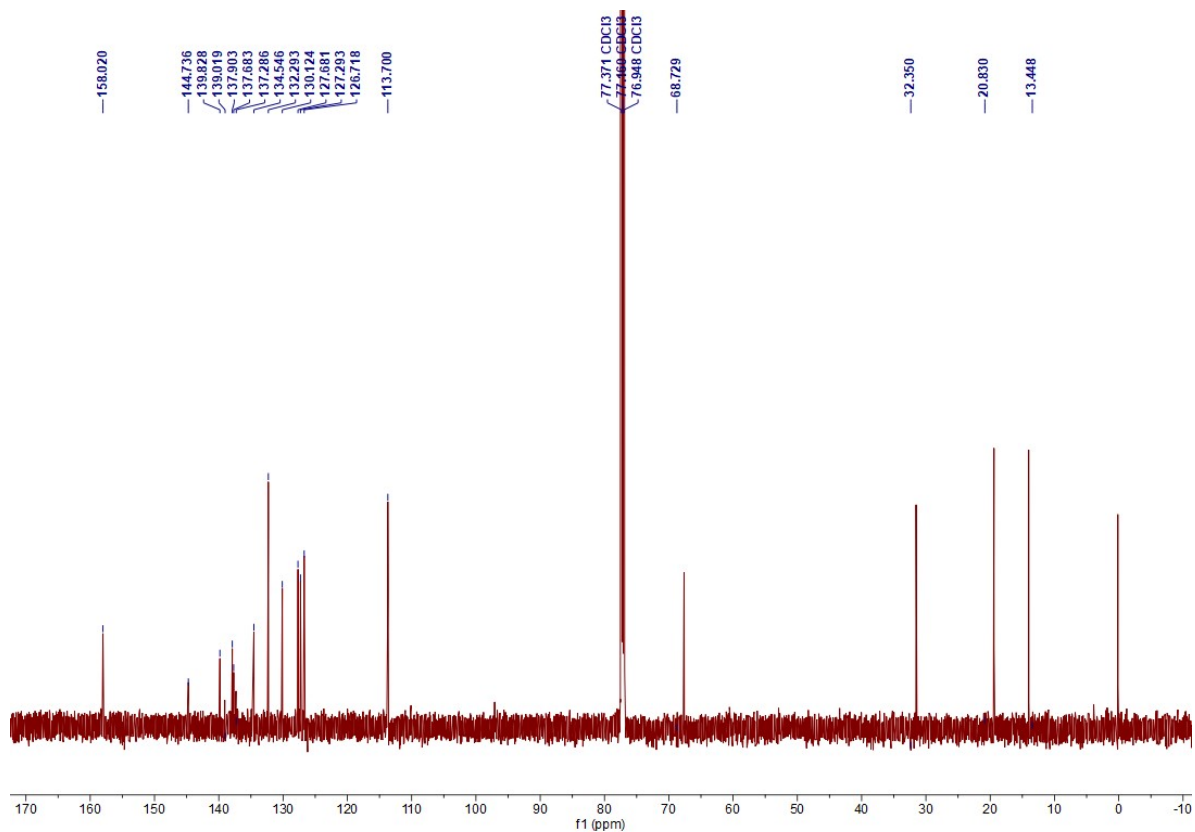

Figure S16. <sup>13</sup>C NMR spectrum of compound [2]CHPE (151 MHz, CDCl<sub>3</sub>).

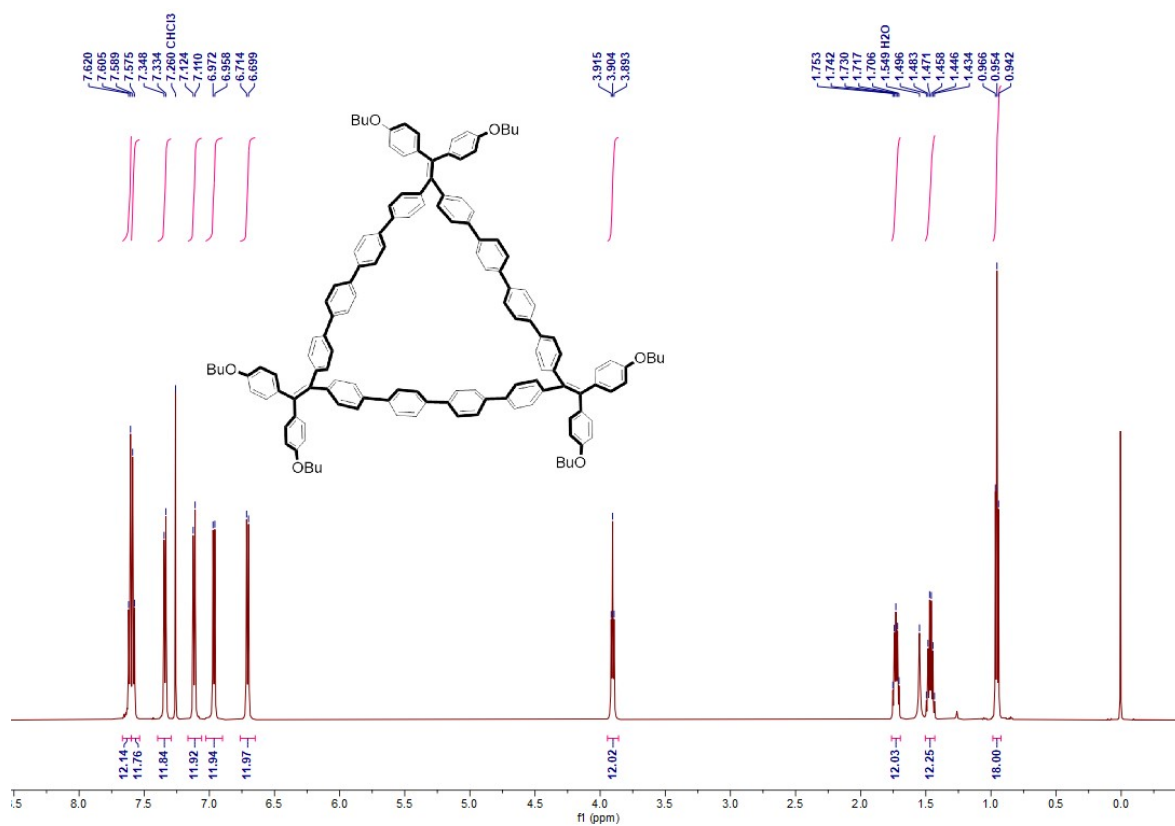

Figure S17. <sup>1</sup>H NMR spectrum of compound [3]CHPE (600 MHz, CDCl<sub>3</sub>).

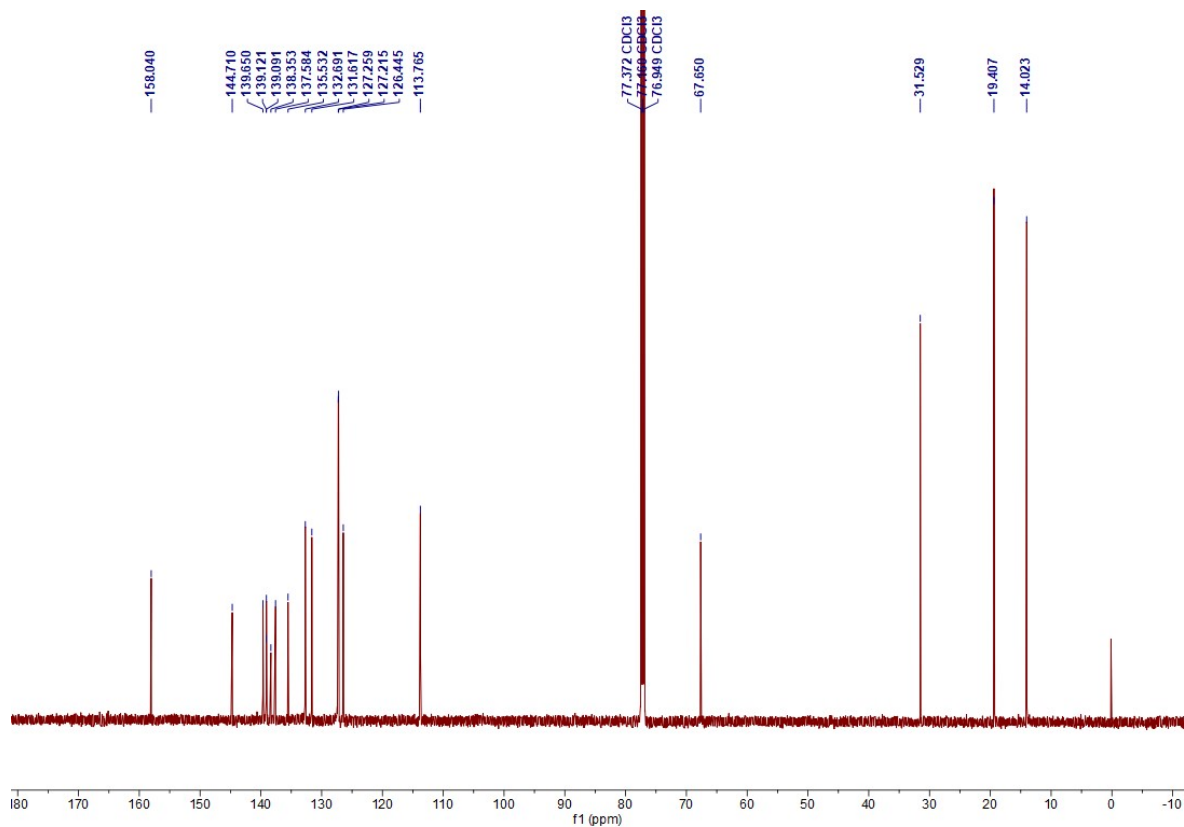

Figure S18.  $^{13}\text{C}$  NMR spectrum of compound [3]CHPE (151 MHz,  $\text{CDCl}_3$ ).

### 3.2. 2D spectra of [2]CTPE

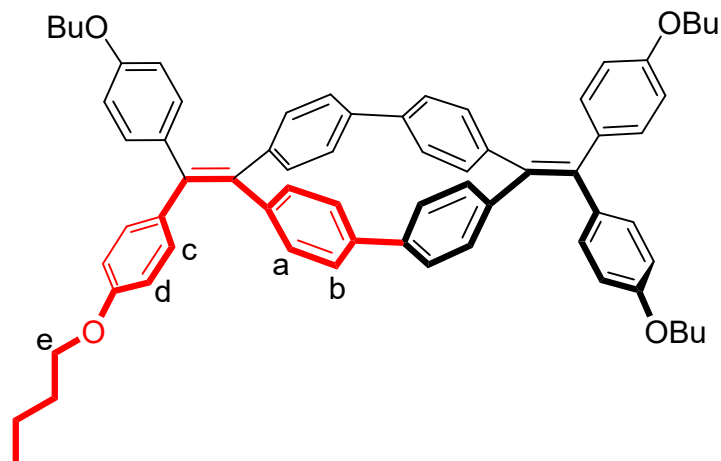

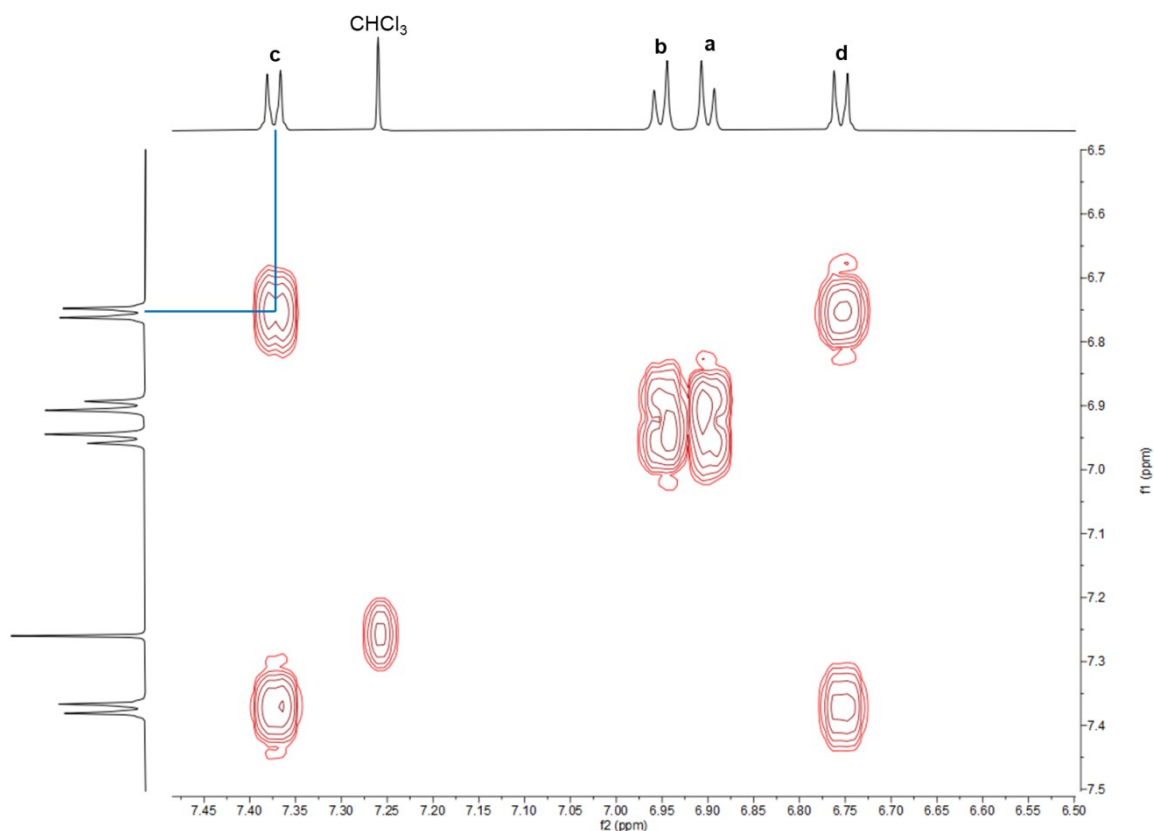

**Figure S19.** The COSY correlation spectrum (600 MHz,  $\text{CDCl}_3$ , 298 K) of **[2]CTPE**, indicating the COSY correlation between proton **a** and proton **b** , and proton **c** and proton **d**.

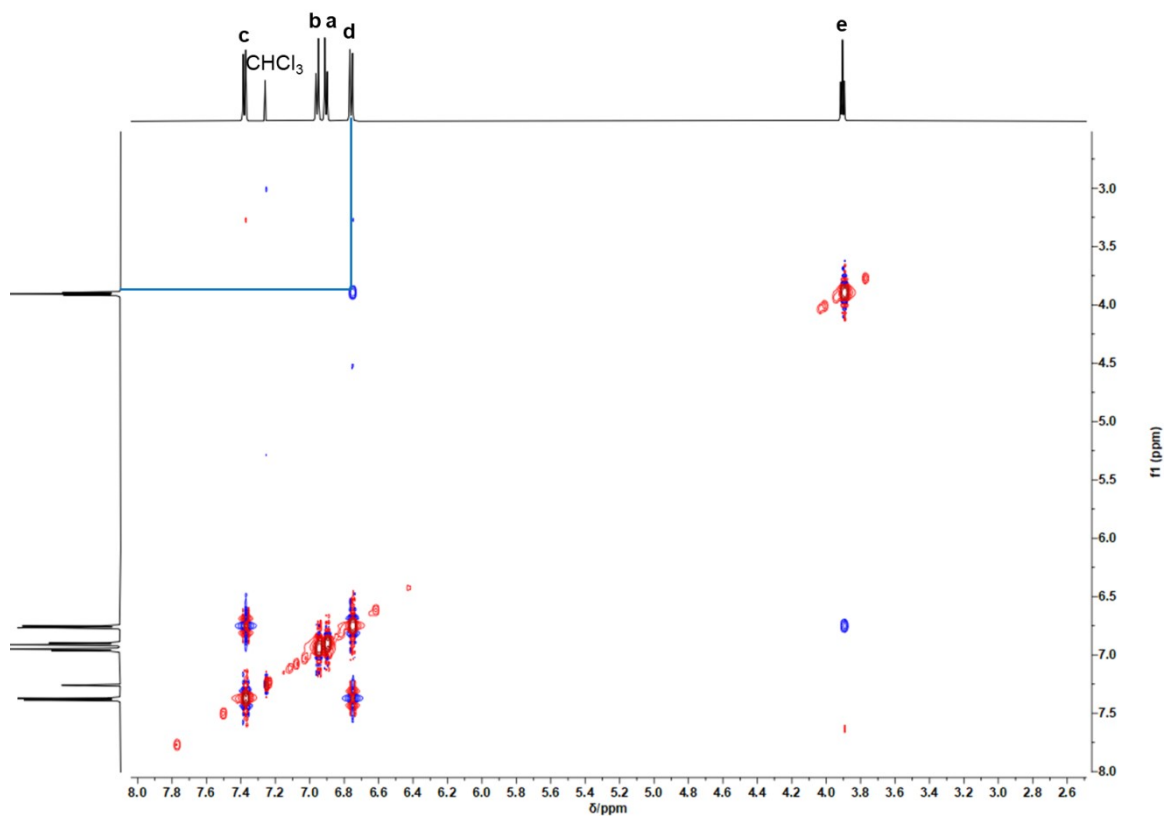

**Figure S20.** The NOESY spectrum (600 MHz,  $\text{CDCl}_3$ , 298 K) of **[2]CTPE**, indicating the NOEs between proton **d** and proton **e**.

### 3.3. 2D spectra of [3]CTPE

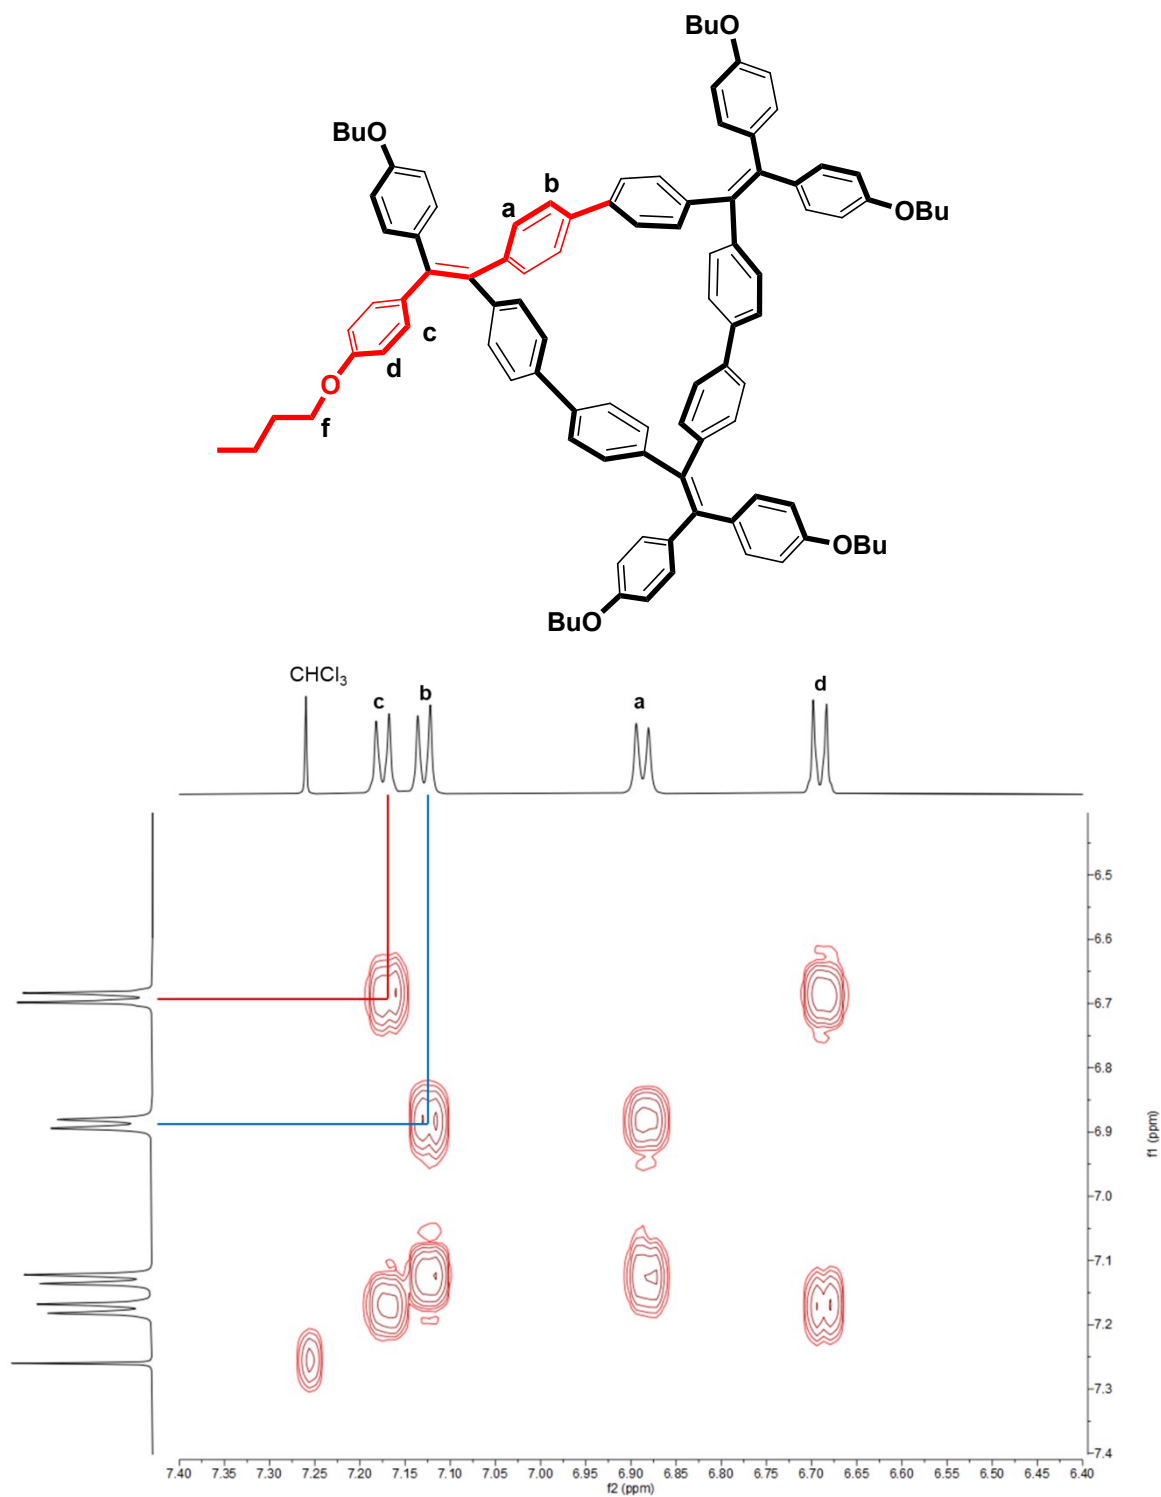

**Figure S21.** The COSY correlation spectrum (600 MHz, CDCl<sub>3</sub>, 298 K) of [3]CTPE, indicating the COSY correlation between proton **a** and proton **b**, and proton **c** and proton **d**.

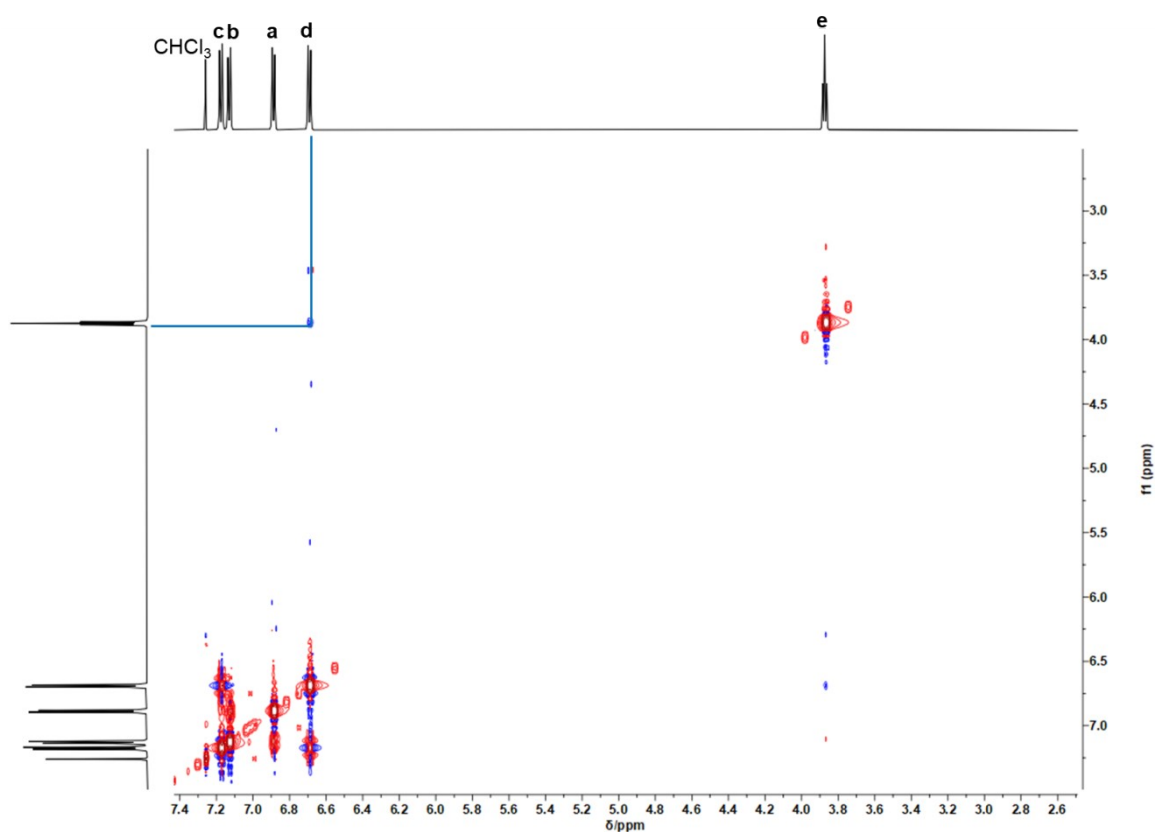

**Figure S22.** The NOESY spectrum (600 MHz,  $\text{CDCl}_3$ , 298 K) of **[3]CTPE**, indicating the NOEs between proton **d** and protons **e**.

### 3.4. 2D spectra of **[4]CTPE**

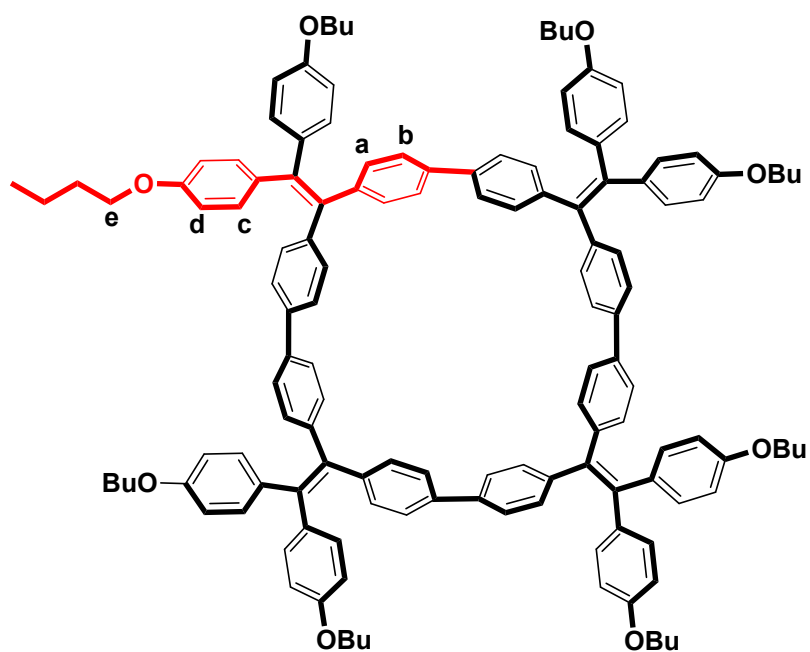



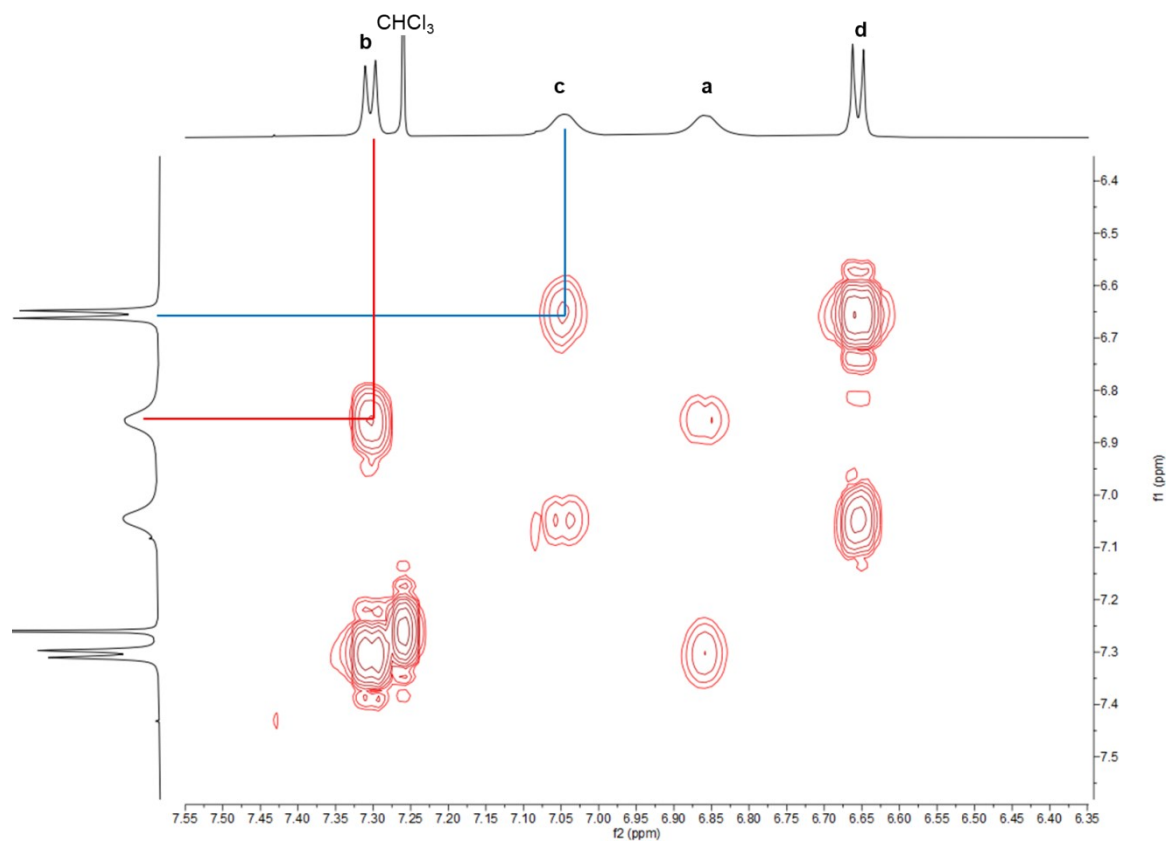

**Figure S23.** The COSY correlation spectrum (600 MHz,  $\text{CDCl}_3$ , 298 K) of **[2]CHPE**, indicating the COSY correlation between proton **a** and proton **b**, and proton **c** and proton **d**.

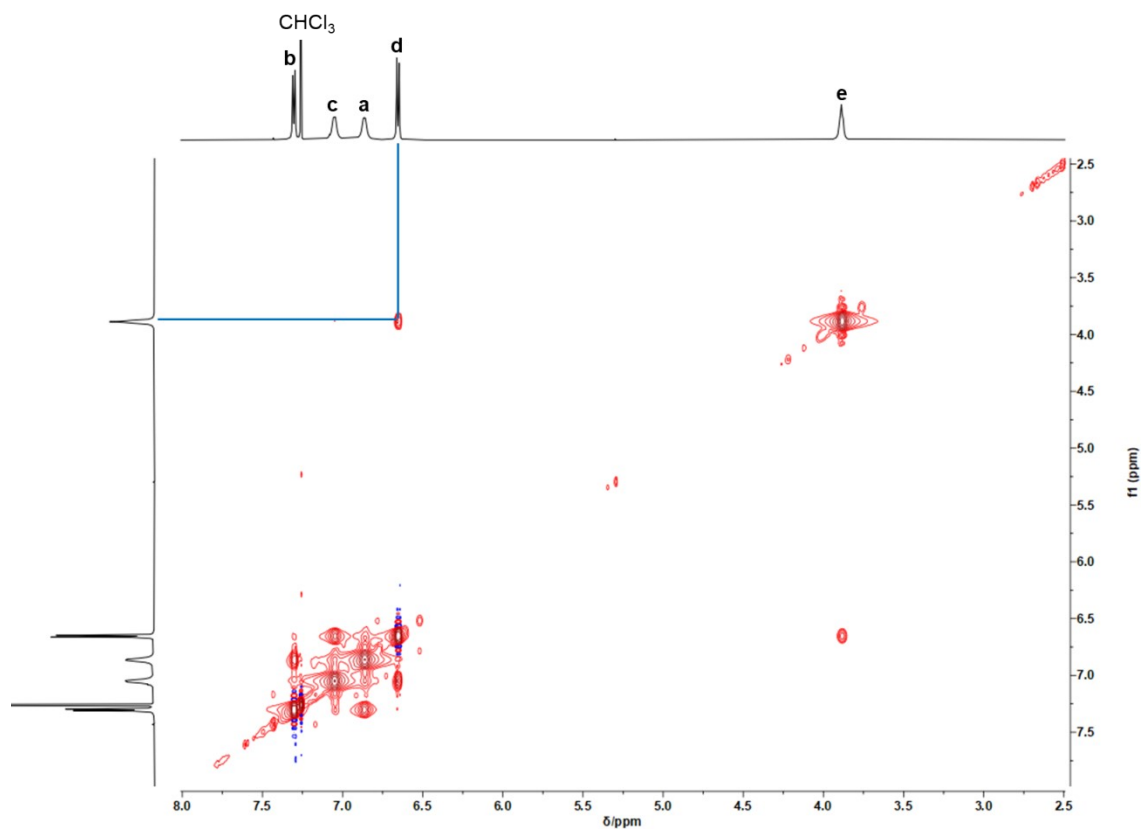

**Figure S24.** The NOESY spectrum (600 MHz,  $\text{CDCl}_3$ , 298 K) of **[2]CHPE**, indicating the NOEs between proton **d** and protons **e**.

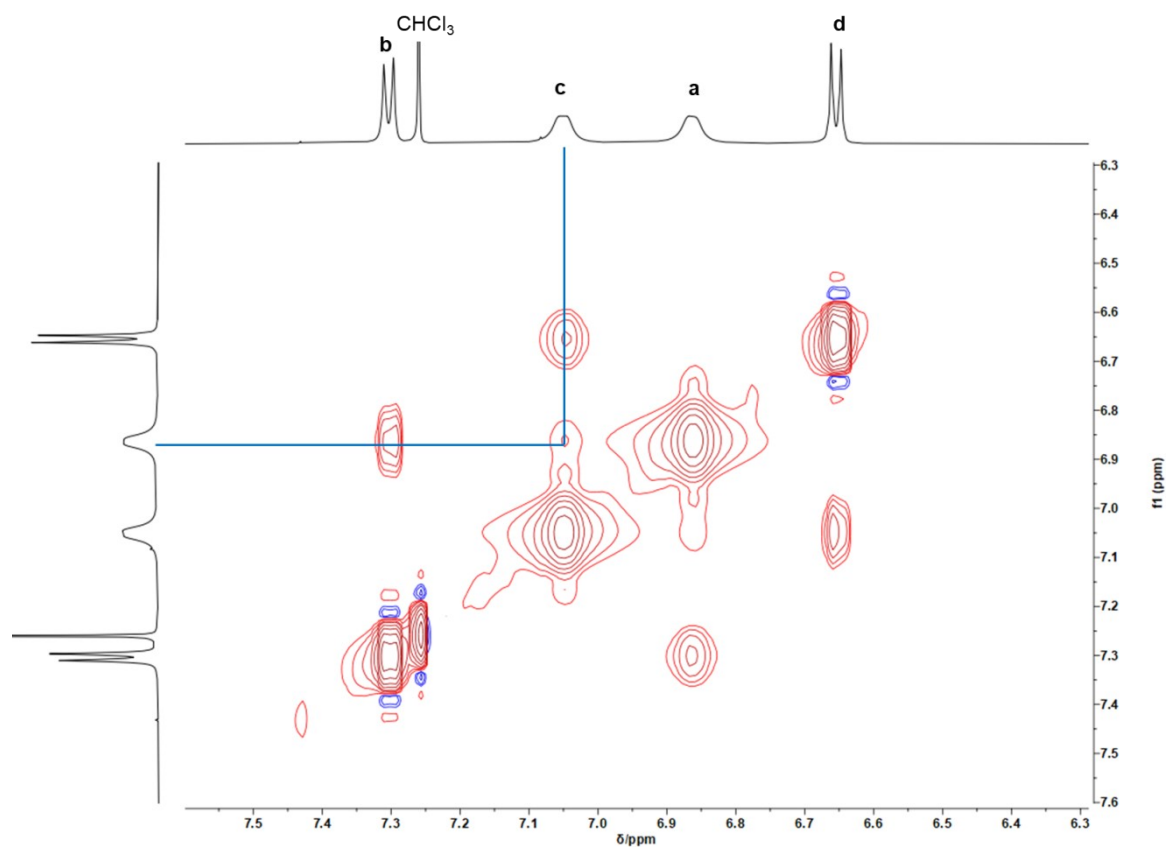

**Figure S25.** The NOESY spectrum (600 MHz, CDCl<sub>3</sub>, 298 K) of **[2]CHPE**, indicating the NOEs between proton **a** and protons **c**.

### 3.5. 2D spectra of **[2]CHPE**

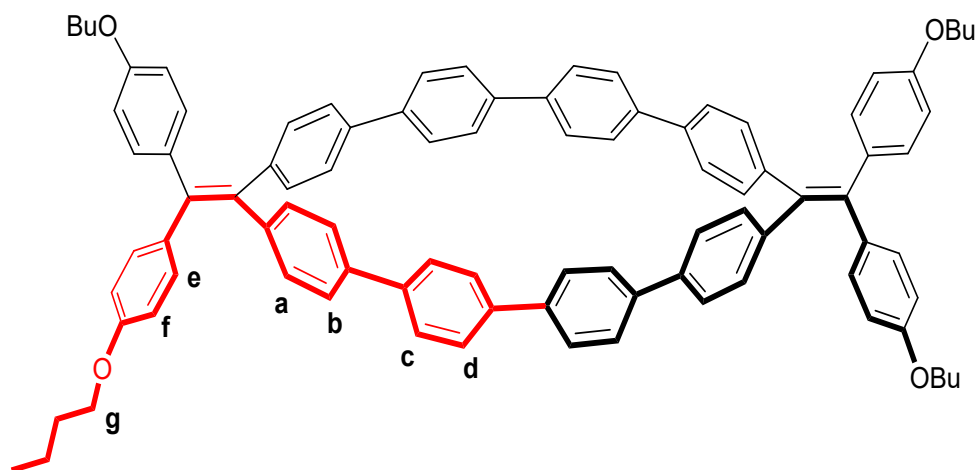

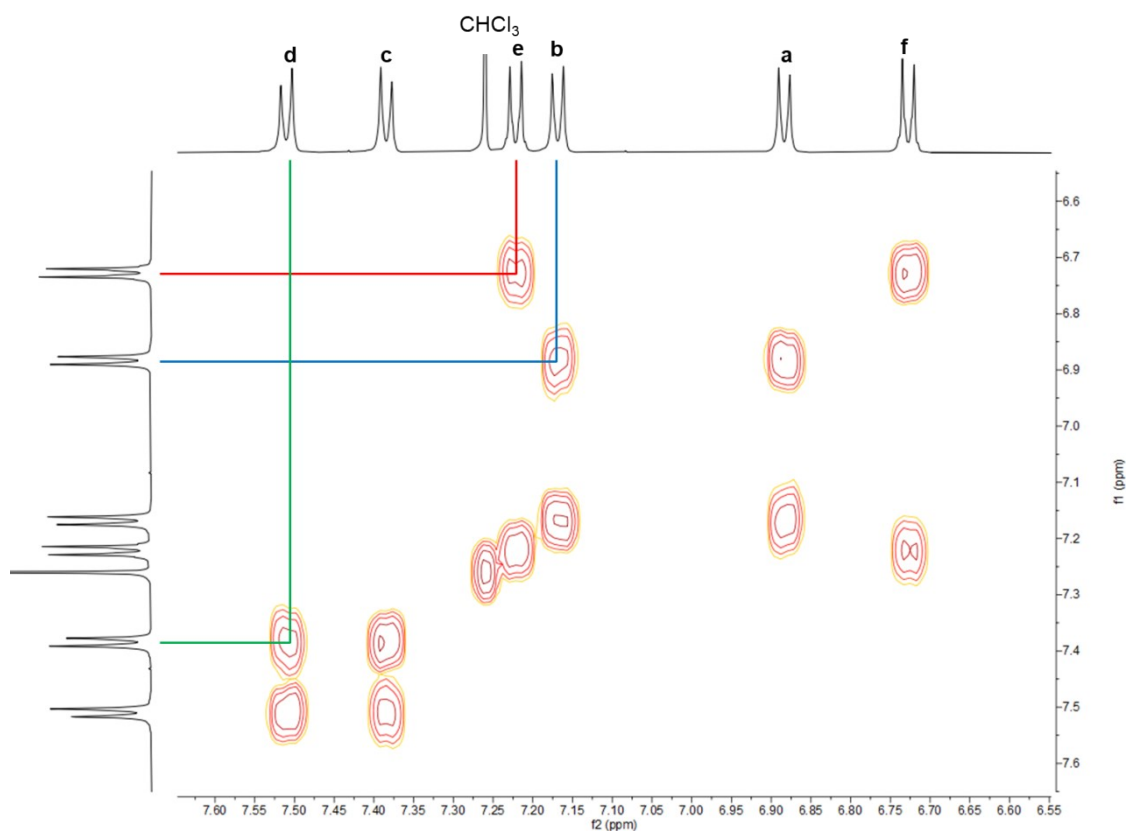

**Figure S26.** The COSY correlation spectrum (600 MHz,  $\text{CDCl}_3$ , 298 K) of **[2]CHPE**, indicating the COSY correlation between proton **a** and proton **b**, and proton **c** and proton **d**, and proton **e** and proton **f**.

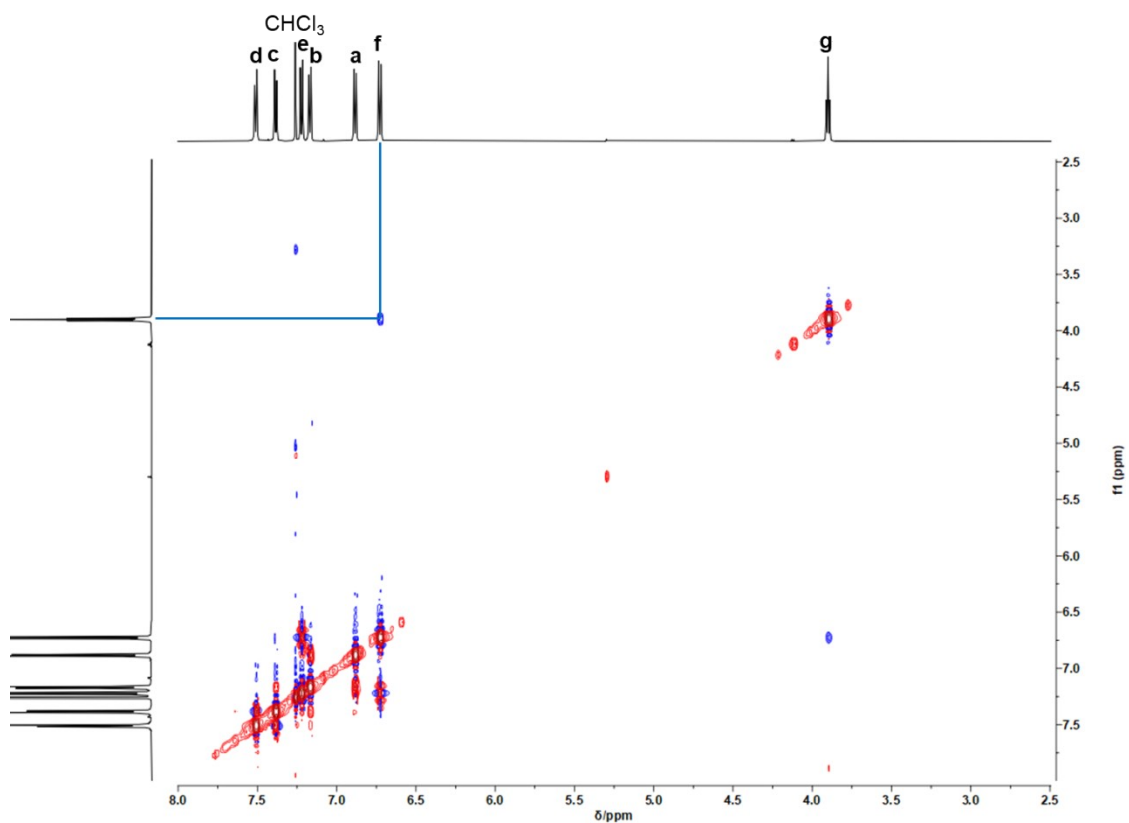

**Figure S27.** The NOESY spectrum (600 MHz,  $\text{CDCl}_3$ , 298 K) of **[2]CHPE**, indicating the NOEs between proton **f** and protons **g**.

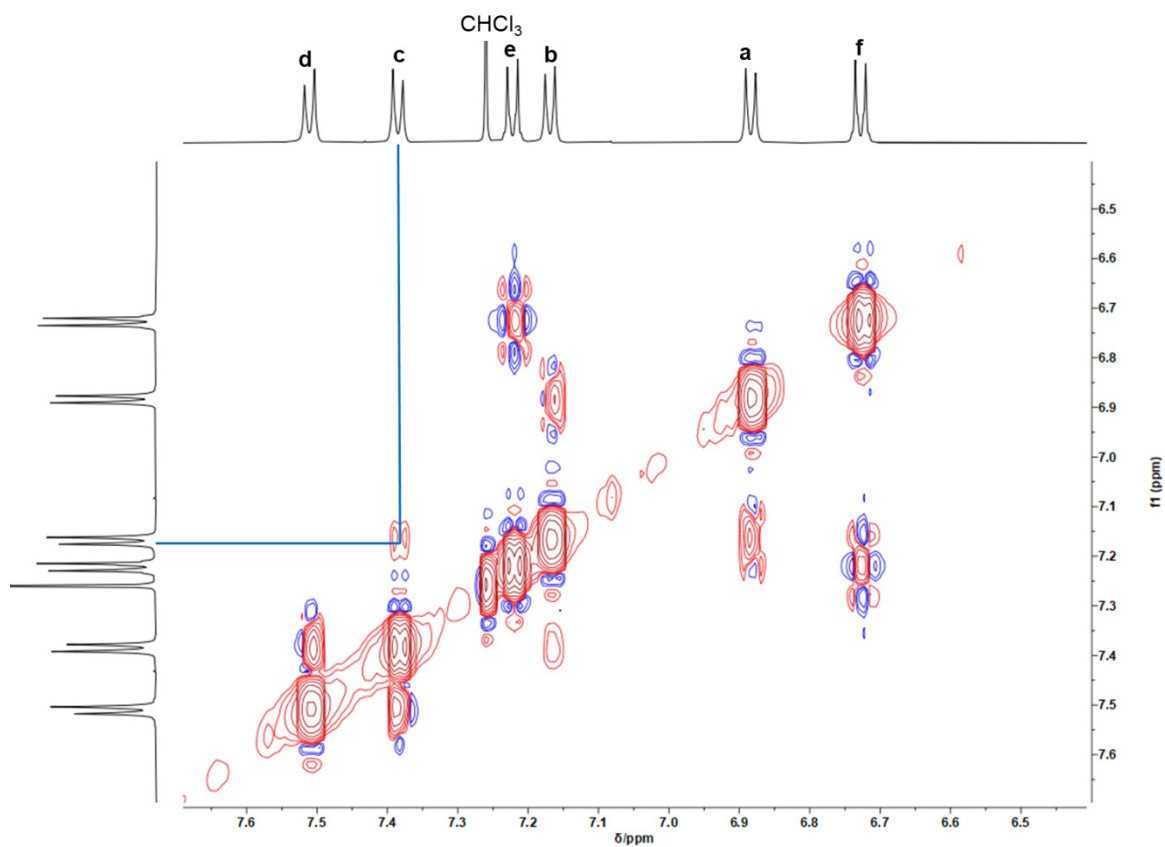

**Figure S28.** The NOESY spectrum (600 MHz,  $\text{CDCl}_3$ , 298 K) of **[2]CHPE**, indicating the NOEs between proton **b** and protons **c**.

### 3.6. 2D spectra of **[3]CHPE**

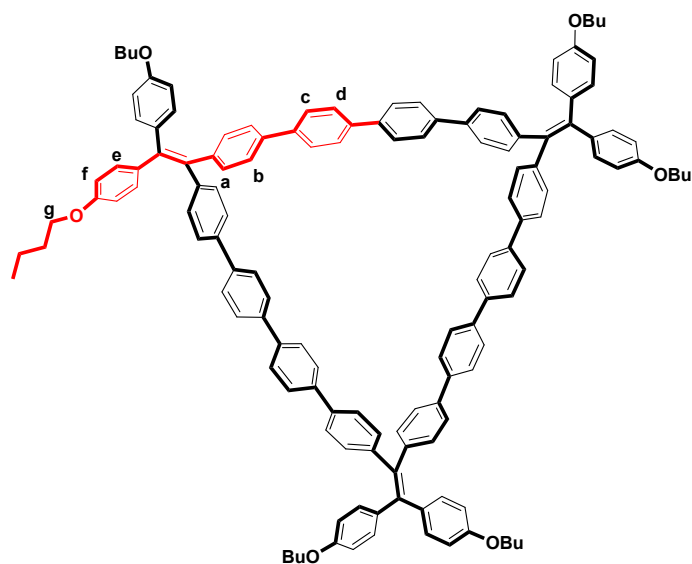

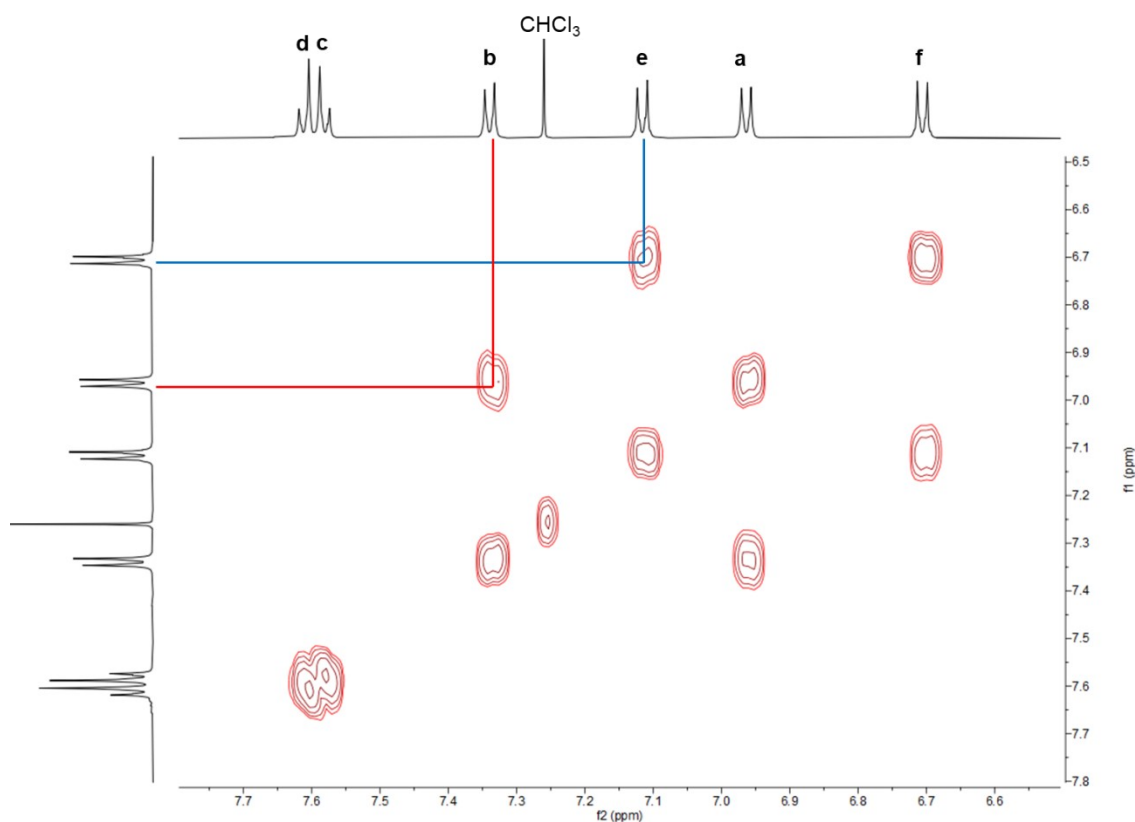

**Figure S29.** The COSY correlation spectrum (600 MHz,  $\text{CDCl}_3$ , 298 K) of **[3]CHPE**, indicating the COSY correlation between proton **a** and proton **b** and proton **e** and **f**.

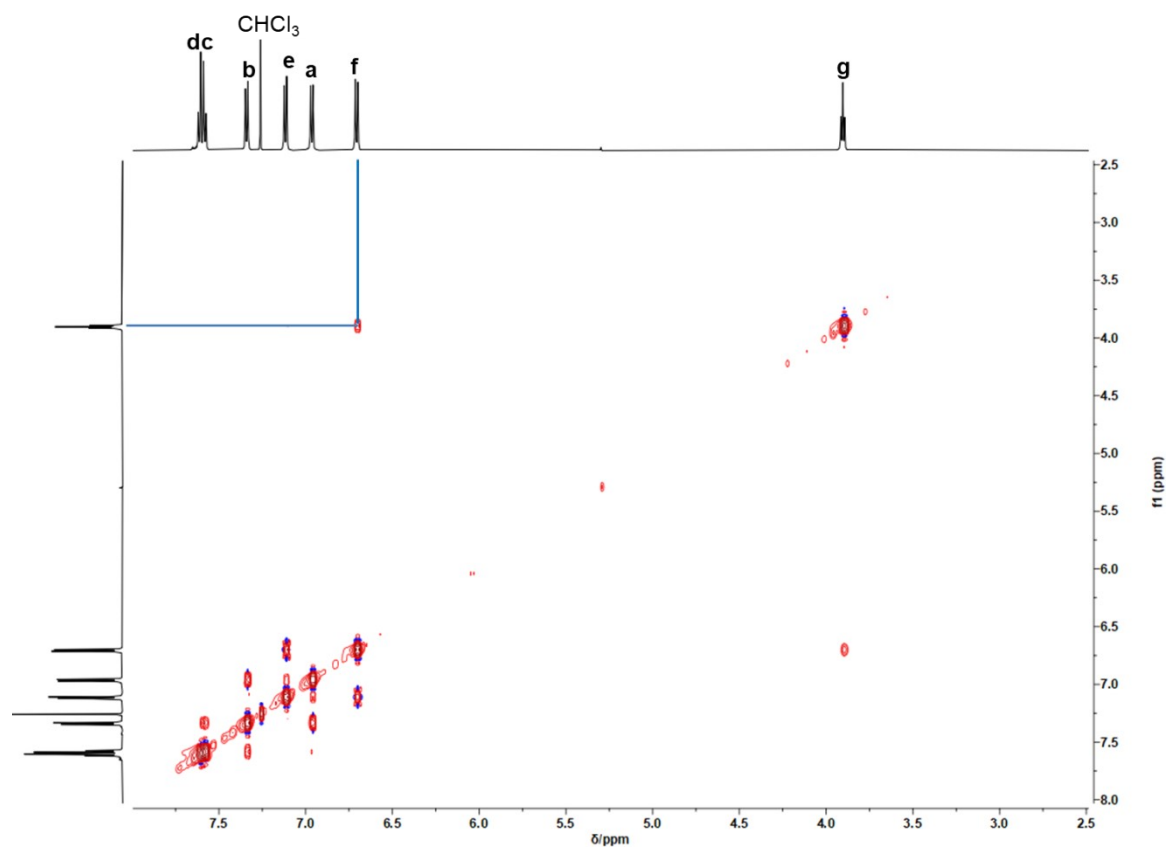

**Figure S30.** The NOESY spectrum (600 MHz,  $\text{CDCl}_3$ , 298 K) of **[3]CHPE**, indicating the NOEs between proton **f** and protons **g**.

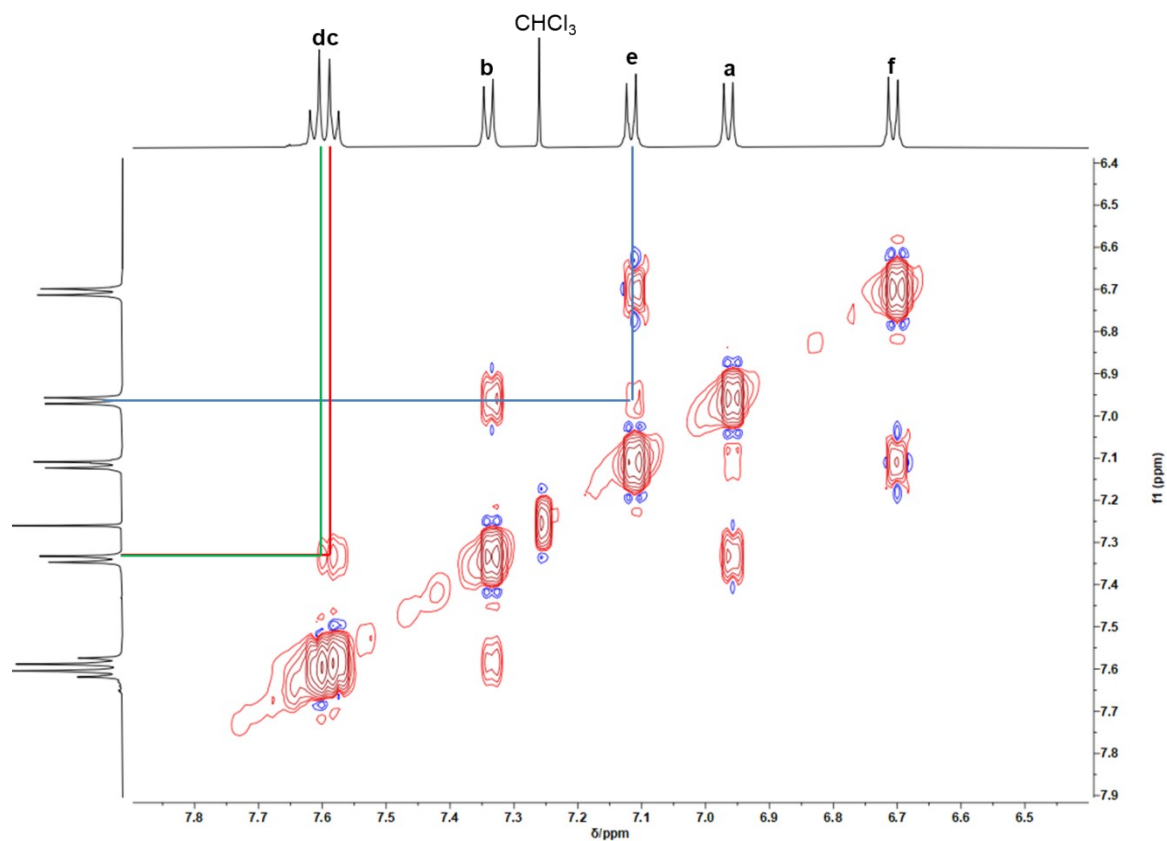

**Figure S31.** The NOESY spectrum (600 MHz, CDCl<sub>3</sub>, 298 K) of [3]CHPE, indicating the NOEs between proton **a** and protons **e** and proton **b** and protons **c**, **d**.

## 4. Mass Spectra

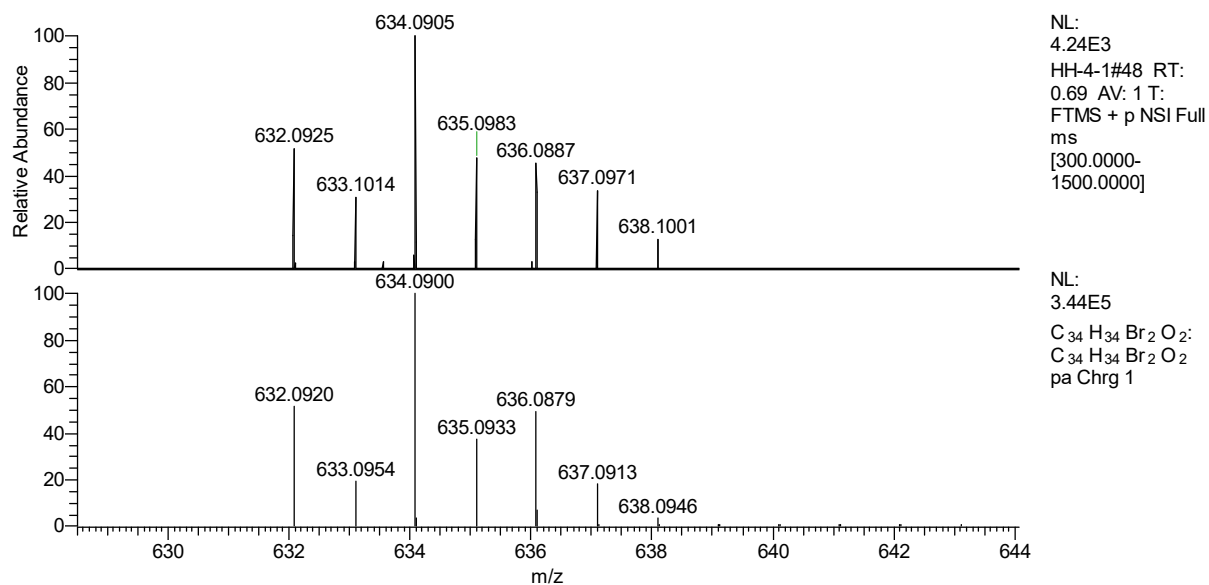

Figure S32. MALDI-TOF spectrum of S2 (top: observed, bottom: simulated).

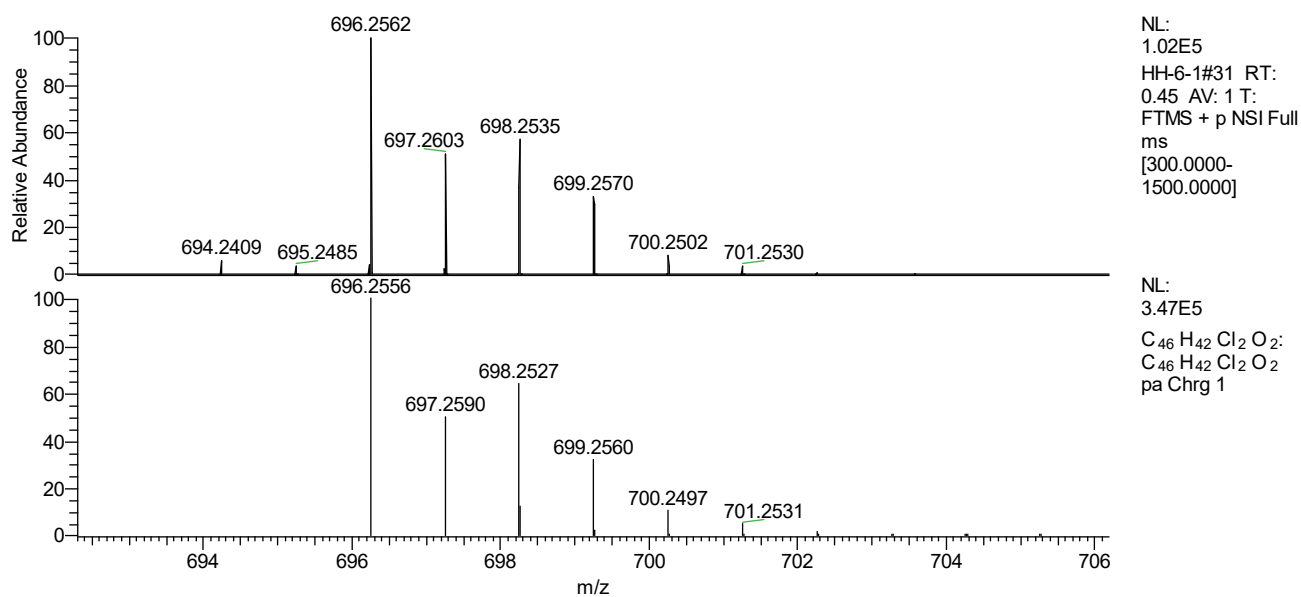

Figure S33. MALDI-TOF spectrum of S3 (top: observed, bottom: simulated).

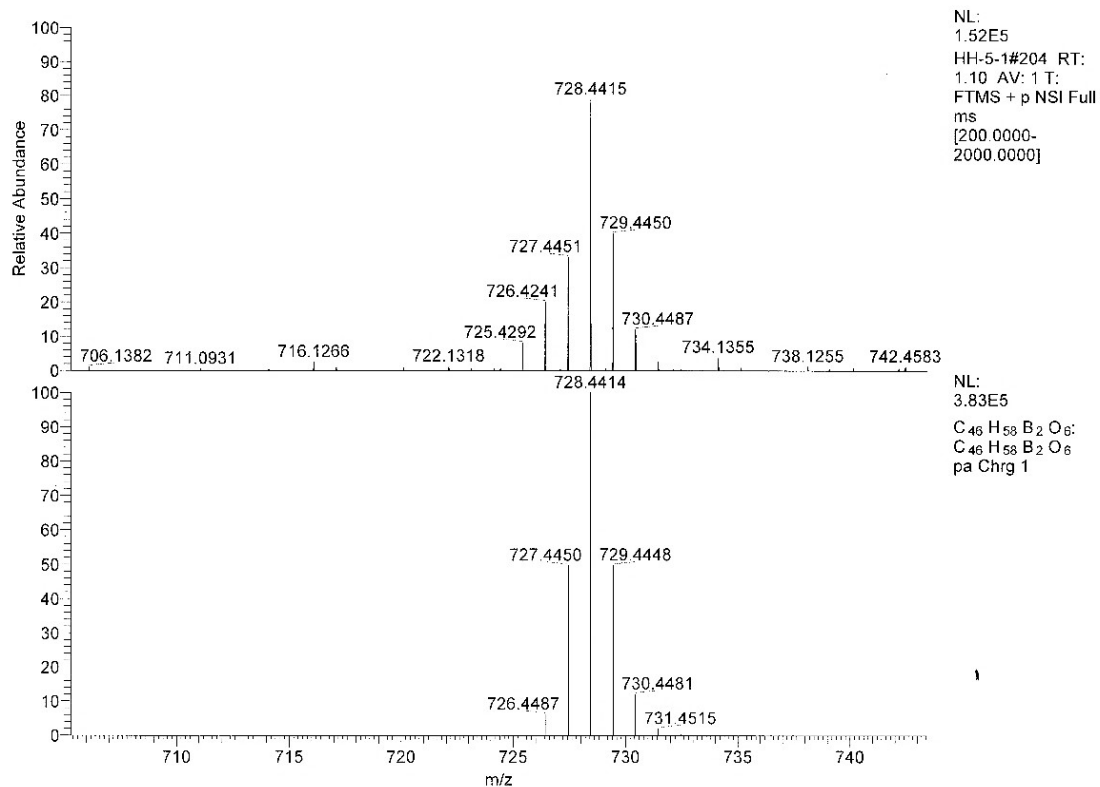

Figure S34. MALDI-TOF spectrum of **1** (top: observed, bottom: simulated).

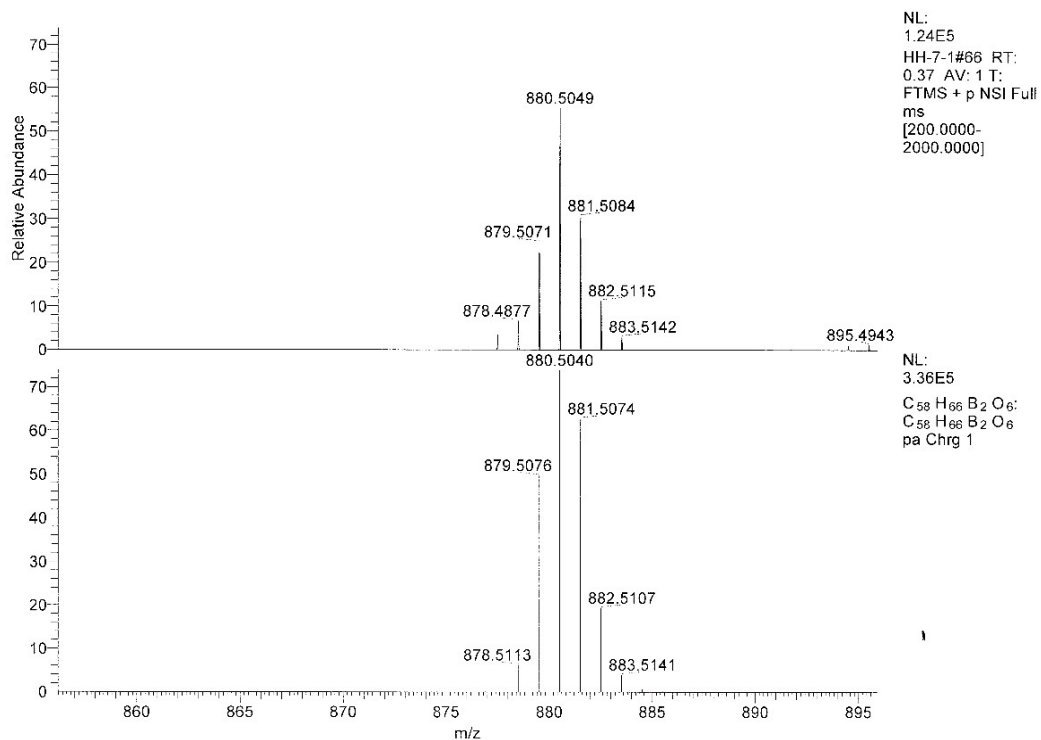

Figure S35. MALDI-TOF spectrum of **2** (top: observed, bottom: simulated).



HH-9-1 #47 RT: 0.48 AV: 1 NL: 9.65E4  
 T: FTMS + p NSI Full ms [500.0000-2500.0000]

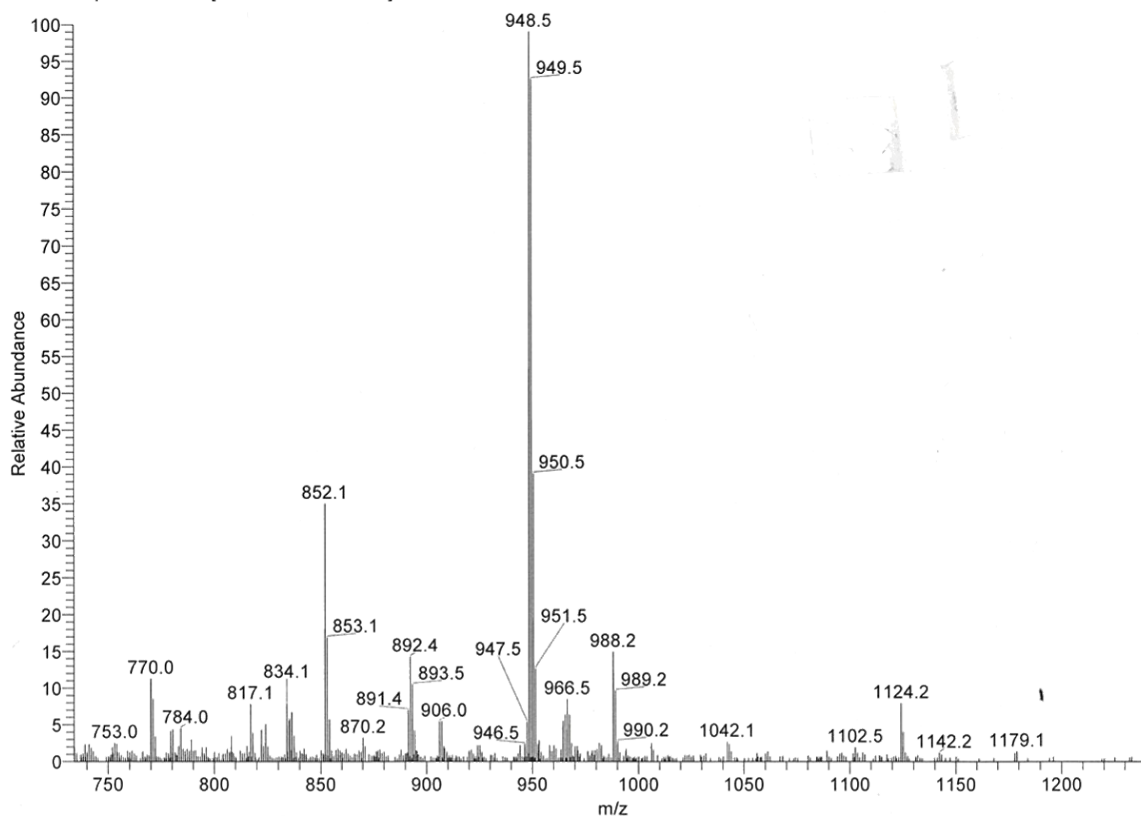

National Center for Organic Mass Spectrometry in Shanghai  
 Shanghai Institute of Organic Chemistry  
 Chinese Academic of Sciences  
 High Resolution MALDI-MS REPORT

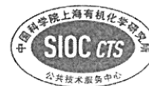

Instrument: Thermo Scientific Q Exactive HF Orbitrap-FTMS

Card Serial Number: E210258

Sample Serial Number: HH-9-1

Operator: Songw Date: 2021/01/21

Operation Mode: MALDI Positive Ion Mode

Elemental composition search on mass 948.5111

m/z= 943.5111-953.5111

| m/z      | Theo. Mass | Delta (ppm) | RDB equiv. | Composition                                                   |
|----------|------------|-------------|------------|---------------------------------------------------------------|
| 948.5111 | 948.5112   | -0.11       | 35.0       | C <sub>68</sub> H <sub>68</sub> O <sub>4</sub>                |
|          | 948.5099   | 1.31        | 35.5       | C <sub>66</sub> H <sub>66</sub> O <sub>3</sub> N <sub>3</sub> |

Figure S36. MALDI-TOF spectrum of [2]CTPE (top: mass spectrum, bottom: high resolution MALDI-MS report).

HH-9-2 #76 RT: 0.76 AV: 1 NL: 2.99E4  
T: FTMS + p NSI Full ms [500.0000-2500.0000]

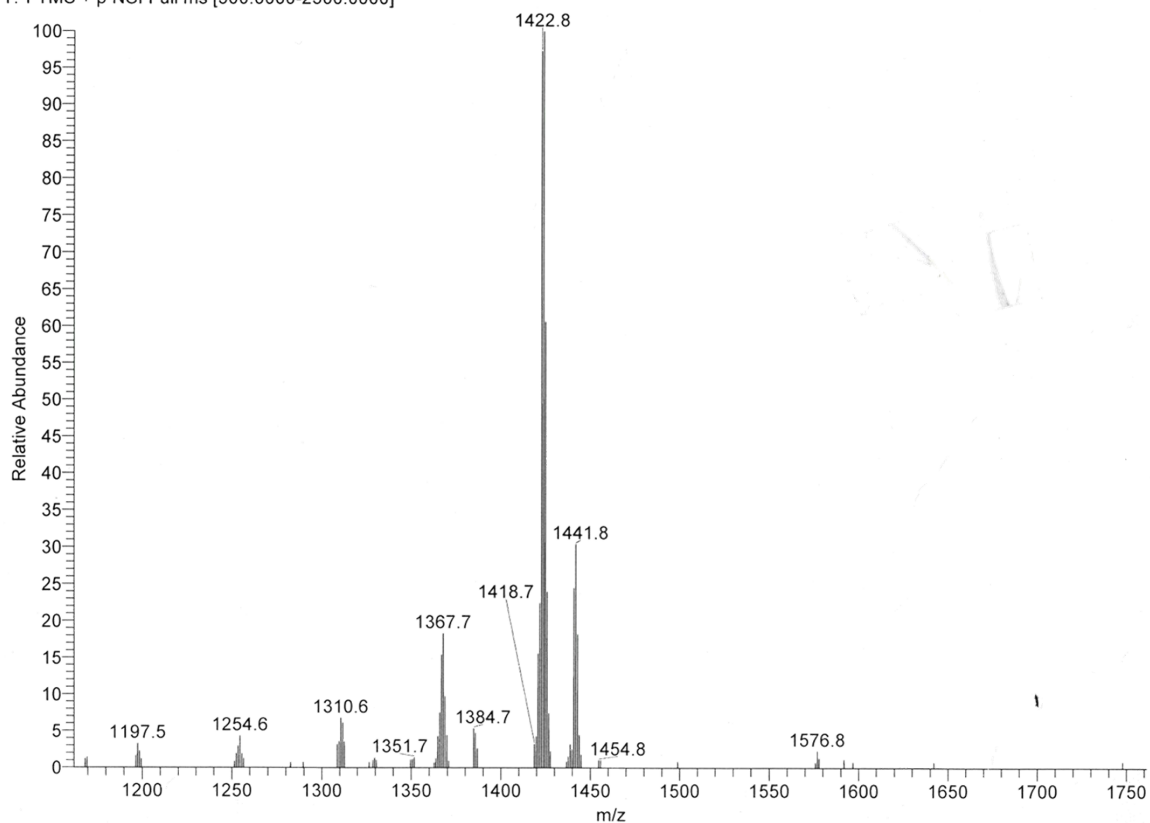

National Center for Organic Mass Spectrometry in Shanghai  
Shanghai Institute of Organic Chemistry  
Chinese Academic of Sciences  
High Resolution MALDI-MS REPORT

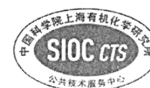

Instrument: Thermo Scientific Q Exactive HF Orbitrap-FTMS

Card Serial Number: E210259

Sample Serial Number: HH-9-2

Operator: Songw Date: 2021/01/21

Operation Mode: MALDI Positive Ion Mode

Elemental composition search on mass 1422.7663

m/z= 1417.7663-1427.7663

| m/z       | Theo. Mass | Delta (ppm) | RDB equiv. | Composition                                      |
|-----------|------------|-------------|------------|--------------------------------------------------|
| 1422.7663 | 1422.7671  | -0.55       | 52.0       | C <sub>102</sub> H <sub>102</sub> O <sub>6</sub> |

Figure S37. MALDI-TOF spectrum of [3]CTPE(top: mass spectrum, bottom: high resolution MALDI-MS report).

HH-9-3 #59 RT: 0.59 AV: 1 NL: 7.15E4  
T: FTMS + p NSI Full ms [1000.0000-3000.0000]

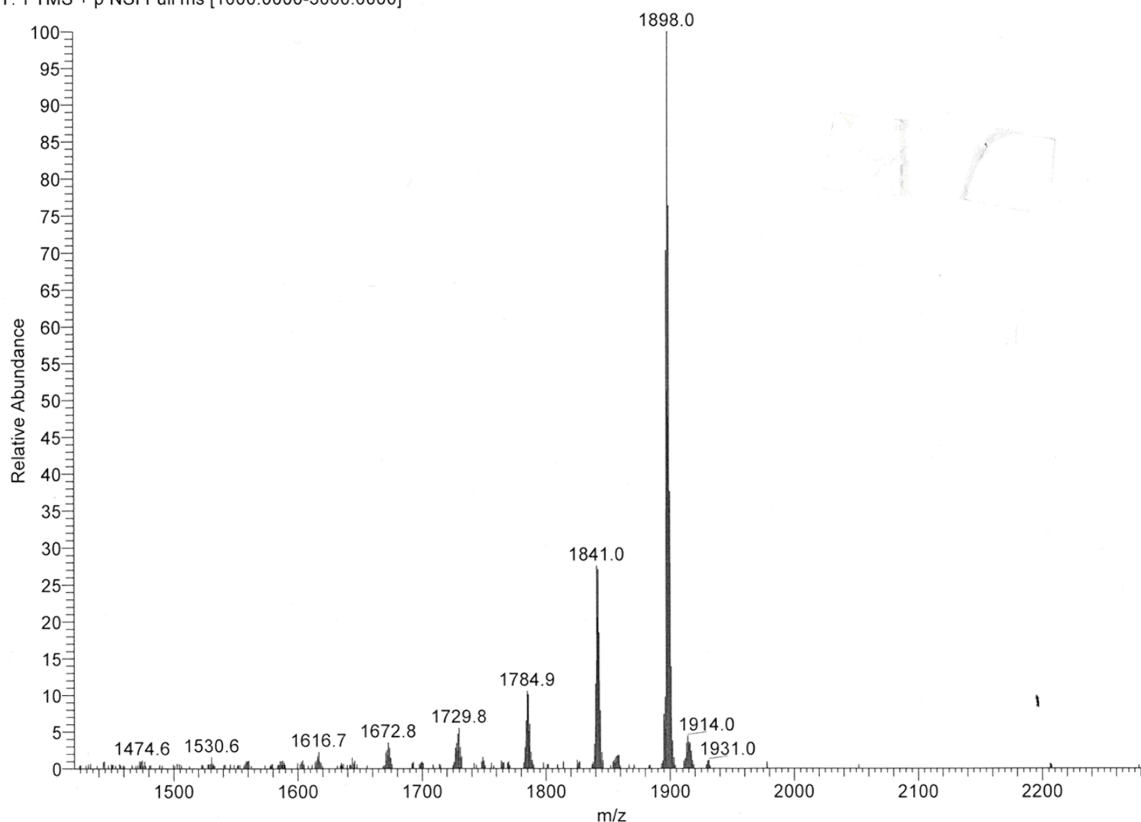

National Center for Organic Mass Spectrometry in Shanghai  
Shanghai Institute of Organic Chemistry  
Chinese Academic of Sciences  
High Resolution MALDI-MS REPORT

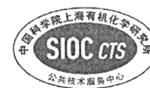

Instrument: Thermo Scientific Q Exactive HF Orbitrap-FTMS

Card Serial Number: E210255

Sample Serial Number: HH-9-3

Operator: Songw Date: 2021/01/21

Operation Mode: MALDI Positive Ion Mode

Elemental composition search on mass 1898.0313

m/z= 1893.0313-1903.0313

| m/z       | Theo. Mass | Delta (ppm) | RDB equiv. | Composition                                      |
|-----------|------------|-------------|------------|--------------------------------------------------|
| 1898.0313 | 1898.0308  | 0.24        | 68.5       | C <sub>136</sub> H <sub>137</sub> O <sub>8</sub> |

Figure S38. MALDI-TOF spectrum of [4]CTPE(top: mass spectrum, bottom: high resolution MALDI-MS report).

HH-8-1 #37 RT: 0.37 AV: 1 NL: 7.09E4  
 T: FTMS + p NSI Full ms [400.0000-1500.0000]

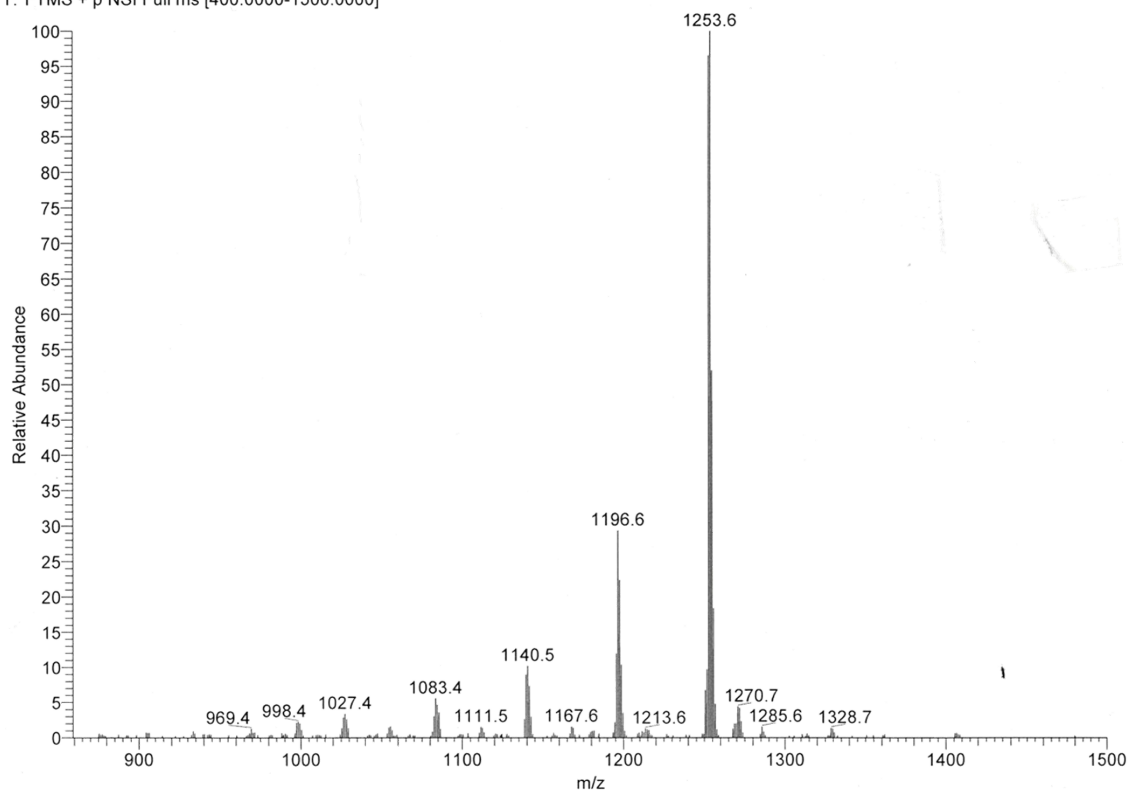

National Center for Organic Mass Spectrometry in Shanghai  
 Shanghai Institute of Organic Chemistry  
 Chinese Academic of Sciences  
 High Resolution MALDI-MS REPORT

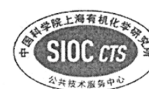

Instrument: Thermo Scientific Q Exactive HF Orbitrap-FTMS

Card Serial Number: E210256

Sample Serial Number: HH-8-1

Operator: Songw Date: 2021/01/21

Operation Mode: MALDI Positive Ion Mode

Elemental composition search on mass 1252.6357

m/z= 1247.6357-1257.6357

| m/z       | Theo. Mass | Delta (ppm) | RDB equiv. | Composition                                    |
|-----------|------------|-------------|------------|------------------------------------------------|
| 1252.6357 | 1252.6364  | -0.54       | 51.0       | C <sub>92</sub> H <sub>84</sub> O <sub>4</sub> |
|           | 1252.6391  | -2.68       | 55.5       | C <sub>95</sub> H <sub>82</sub> O <sub>N</sub> |

Figure S39. MALDI-TOF spectrum of [2]CHPE(top: mass spectrum, bottom: high resolution MALDI-MS report).

HH-8-2 #97 RT: 0.97 AV: 1 NL: 2.72E4  
T: FTMS + p NSI Full ms [500.0000-2500.0000]

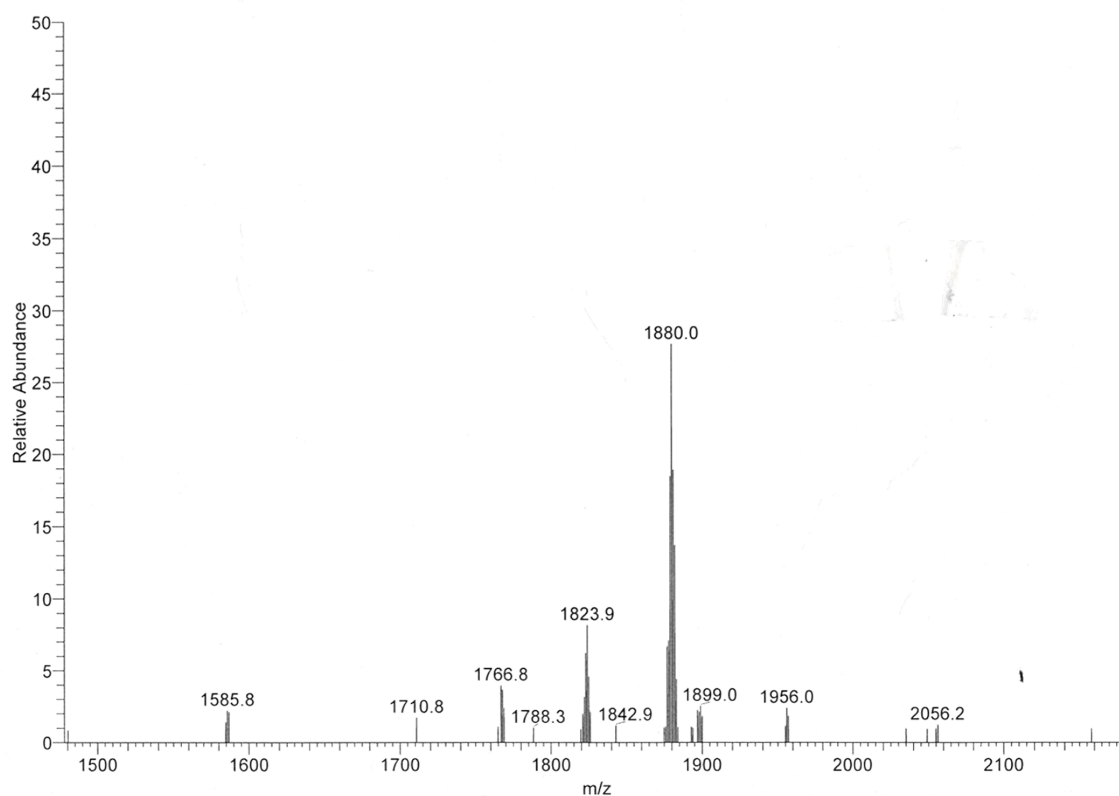

National Center for Organic Mass Spectrometry in Shanghai  
Shanghai Institute of Organic Chemistry  
Chinese Academic of Sciences  
High Resolution MALDI-MS REPORT

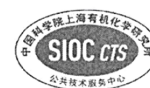

Instrument: Thermo Scientific Q Exactive HF Orbitrap-FTMS

Card Serial Number: E210257

Sample Serial Number: HH-8-2

Operator: Songw Date: 2021/01/21

Operation Mode: MALDI Positive Ion Mode

Elemental composition search on mass 1878.9546

m/z= 1873.9546-1883.9546

| m/z       | Theo. Mass | Delta (ppm) | RDB equiv. | Composition                                      |
|-----------|------------|-------------|------------|--------------------------------------------------|
| 1878.9546 | 1878.9549  | -0.16       | 76.0       | C <sub>138</sub> H <sub>126</sub> O <sub>6</sub> |

**Figure S40.** MALDI-TOF spectrum of [3]CHPE(top: mass spectrum, bottom: high resolution MALDI-MS report).

## 5. X-ray Crystallography

The diffraction intensity data of [2]CTPE was measured at 293 K on a Bruker APEX-II CCD diffractometer (Mo-K $\alpha$  radiation,  $\lambda = 0.71073$  Å) equipped with a graphite monochromator and a CCD area detector. The structure was solved by direct methods using SHELXS-97 and refined using a full-matrix least-squares technique based on  $F^2$  using SHELXL-2013.<sup>[3]</sup> The nonhydrogen atoms were refined anisotropically. The H atoms attached to carbons were added geometrically and refined isotropically with the riding model. The butoxy in the structure is disordered. The crystal data were collected in Table S1.

**Table S1.** Crystal data and structure refinement for [2]CTPE

|                                      |                                                                        |                       |
|--------------------------------------|------------------------------------------------------------------------|-----------------------|
| CCDC                                 | 2115907                                                                |                       |
| Empirical formula                    | C <sub>68</sub> H <sub>68</sub> O <sub>4</sub>                         |                       |
| Formula weight                       | 949.22                                                                 |                       |
| Temperature                          | 293(2) K                                                               |                       |
| Wavelength                           | 0.71073 Å                                                              |                       |
| Crystal system                       | Orthorhombic                                                           |                       |
| Space group                          | P b c n                                                                |                       |
| Unit cell dimensions                 | a = 27.6563(10) Å                                                      | $\alpha = 90^\circ$ . |
|                                      | b = 19.8177(7) Å                                                       | $\beta = 90^\circ$ .  |
|                                      | c = 20.4671(9) Å                                                       | $\gamma = 90^\circ$ . |
| Volume                               | 11217.7(8) Å <sup>3</sup>                                              |                       |
| Z                                    | 8                                                                      |                       |
| Density (calculated)                 | 1.124 Mg/m <sup>3</sup>                                                |                       |
| Absorption coefficient               | 0.068 mm <sup>-1</sup>                                                 |                       |
| F(000)                               | 4064                                                                   |                       |
| Crystal size                         | 0.200 x 0.110 x 0.070 mm <sup>3</sup>                                  |                       |
| Theta range for data collection      | 1.990 to 25.000°.                                                      |                       |
| Index ranges                         | -32 $\leq$ h $\leq$ 32, -23 $\leq$ k $\leq$ 23, -24 $\leq$ l $\leq$ 24 |                       |
| Reflections collected                | 83833                                                                  |                       |
| Independent reflections              | 9873 [ $R_{\text{int}} = 0.1136$ ]                                     |                       |
| Completeness to theta = 25.242°      | 97.2 %                                                                 |                       |
| Absorption correction                | Semi-empirical from equivalents                                        |                       |
| Max. and min. transmission           | 0.7456 and 0.6213                                                      |                       |
| Refinement method                    | Full-matrix least-squares on $F^2$                                     |                       |
| Data / restraints / parameters       | 9873 / 120 / 741                                                       |                       |
| Goodness-of-fit on $F^2$             | 1.191                                                                  |                       |
| Final R indices [ $I > 2\sigma(I)$ ] | $R_1 = 0.1190$ , $wR_2 = 0.3161$                                       |                       |
| R indices (all data)                 | $R_1 = 0.2116$ , $wR_2 = 0.4013$                                       |                       |
| Extinction coefficient               | 0.0051(12)                                                             |                       |

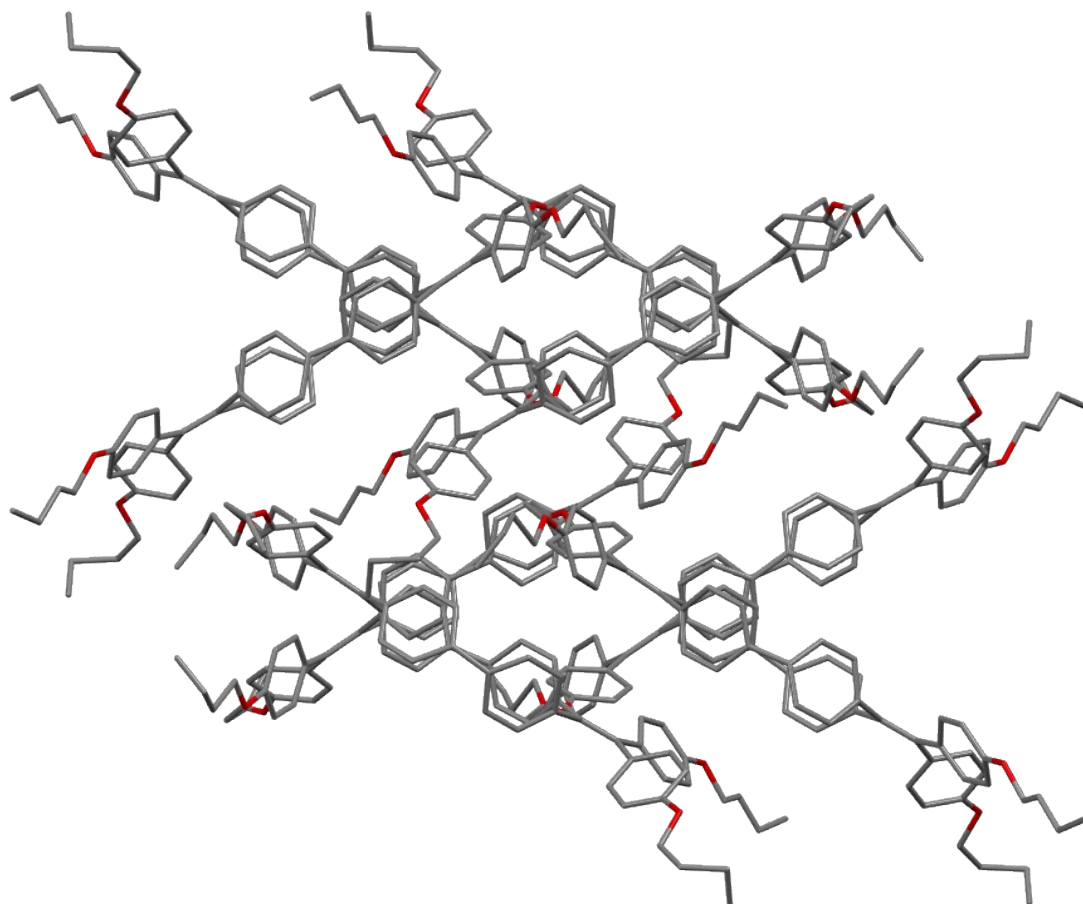

**Figure S41.** Molecular packing of [2]CTPE.

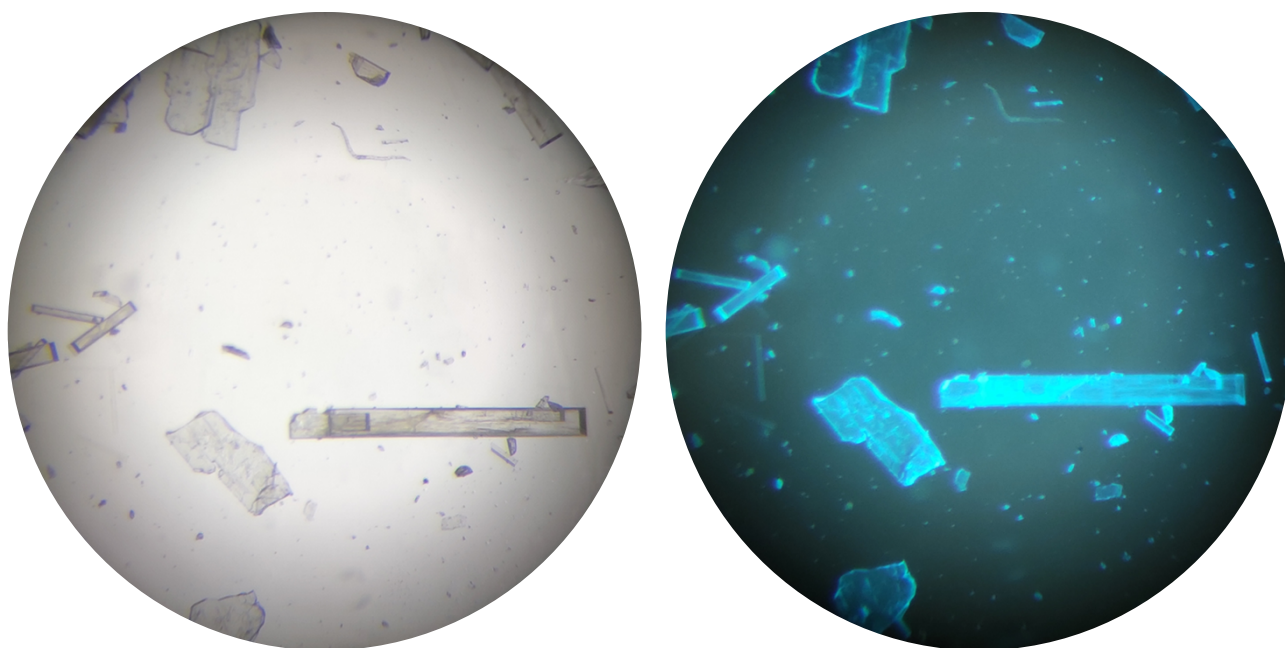

**Figure S42.** Magnifying glass image of [2]CTPE crystals without (Left) and with (Right) UV irradiation at 365 nm.



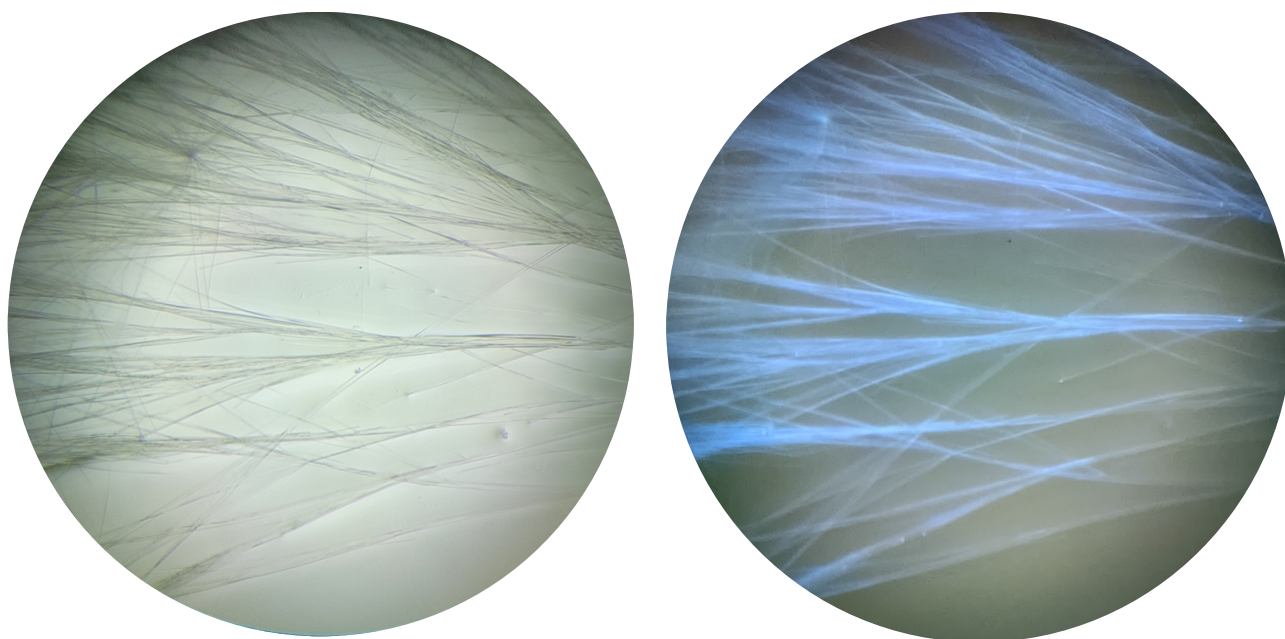

**Figure S43.** Magnifying glass image of [3]CTPE microcrystals without (Left) and with (Right) UV irradiation at 365 nm. The microcrystals were grown by slow diffusion of isopropyl alcohol into chloroform solution had very weak X-ray diffraction.

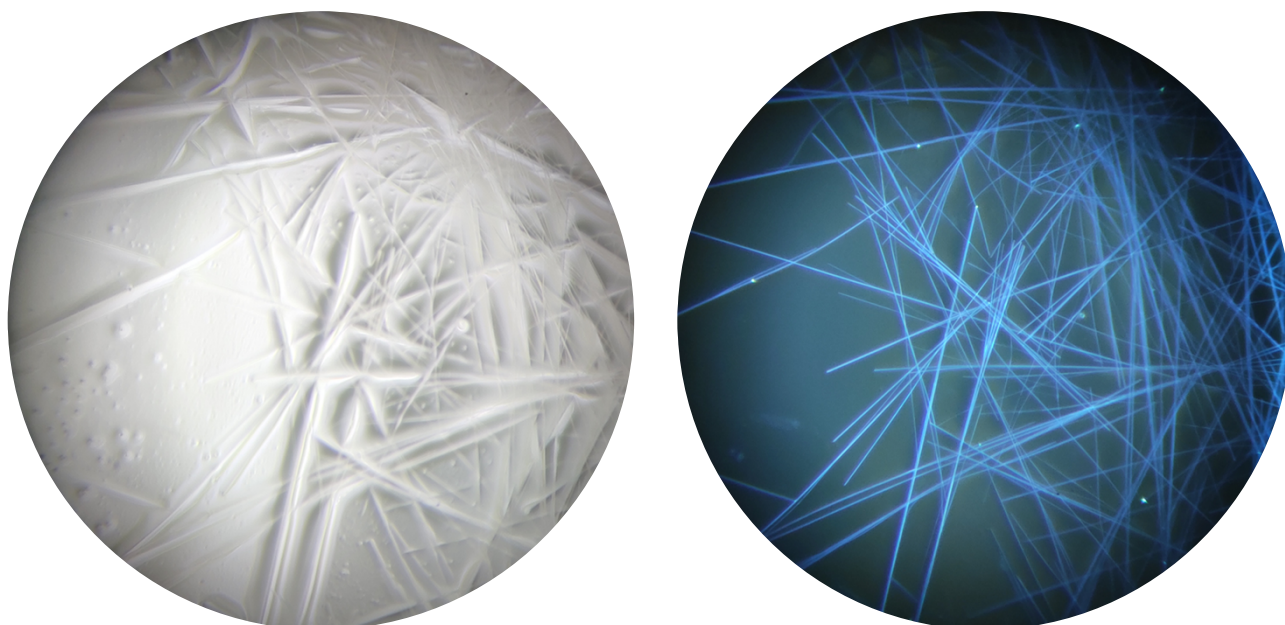

**Figure S44.** Magnifying glass image of [4]CTPE microcrystals without (Left) and with (Right) UV irradiation at 365 nm. The microcrystals were grown by slow diffusion of *n*-hexane into chloroform solution, had very weak X-ray diffraction.



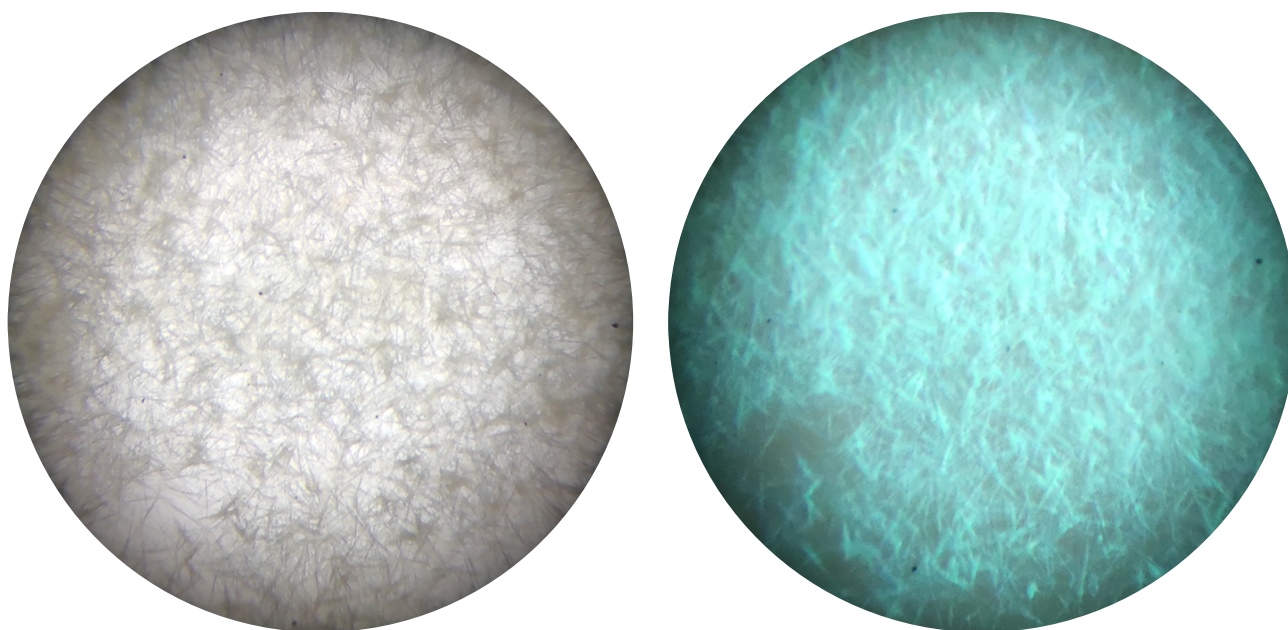

**Figure S45.** Magnifying glass image of [2]CHPE microcrystals without (Left) and with (Right) UV irradiation at 365 nm. The microcrystals were grown by slow diffusion of *n*-hexane into chloroform solution, had very weak X-ray diffraction.

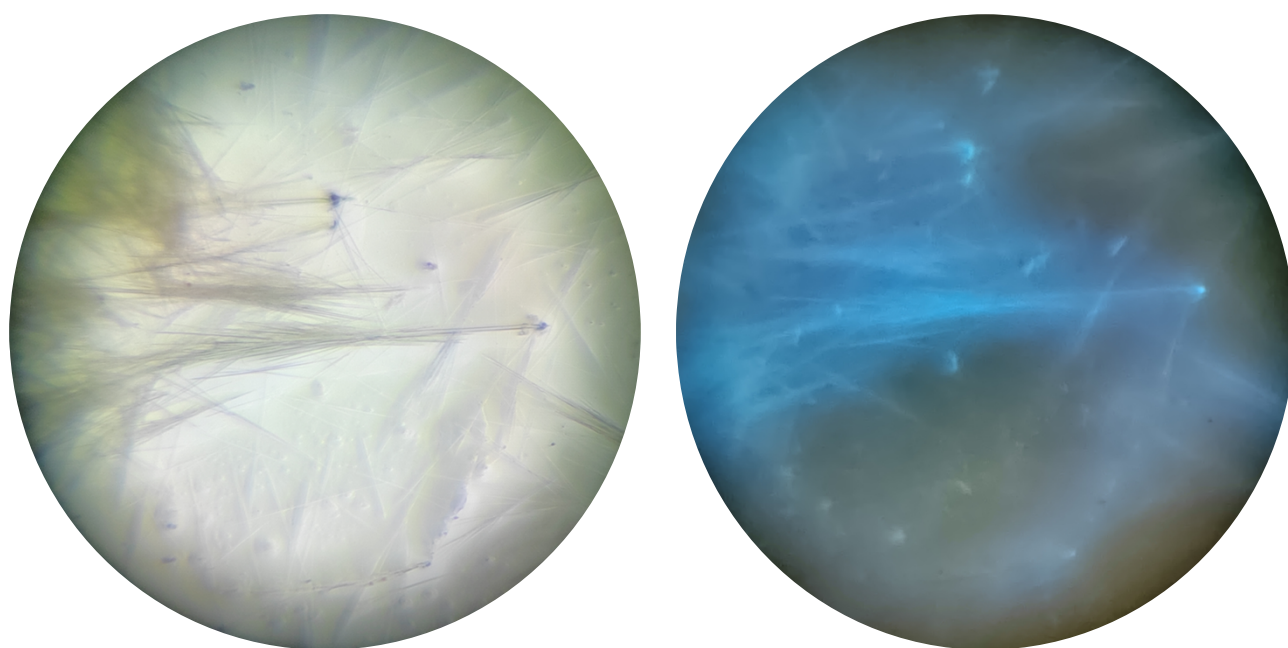

**Figure S46.** Magnifying glass image of [3]CHPE microcrystals without (Left) and with (Right) UV irradiation at 365 nm. The microcrystals were grown by slow diffusion of *n*-hexane into chloroform solution, had very weak X-ray diffraction.

## 6. DFT Calculations

All calculations were carried out using the Gaussian 16 program.<sup>[4]</sup> The structures of [2]CTPE, [3]CTPE and [4]CTPE were fully optimized without any symmetry restriction. Calculations were performed by the density functional theory (DFT) method with restricted B3LYP level, employing a basis sets 6-31G(d).<sup>[5]</sup> N-butoxy groups were replaced by methoxy due to simplify the structures and reduce the calculation costs. TD-DFT calculations were performed at the B3LYP/6-31G(d) level of theory. Nucleus independent chemical shift (NICS) values were calculated using the standard GIAO (GIAO=NMR) at the level of B3LYP/6-311+G(2d,p) with SMD (CHCl<sub>3</sub>) model.<sup>[6]</sup> Visualization of molecular orbitals was performed by the use of GaussView 6.0.16 software with 0.02 of isovalue.<sup>[7]</sup>

**Table S2.** Calculated B3LYP/6-31G(d) distance( $d$ (Å)), inner angle ( $\alpha_1$  (°)), outer angle ( $\alpha_2$  (°)), displacement angle ( $\beta_1, \beta_2, \beta_3, \beta_4$  (°)) and torsion angles ( $\theta_1, \theta_2$  (°)) of [n]CHPEs.

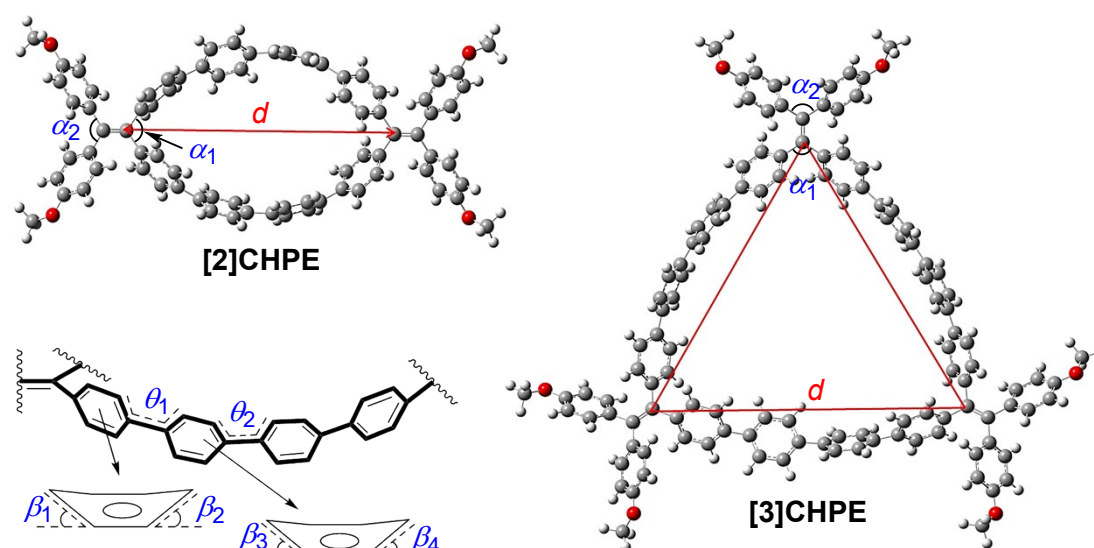

|         | Distance(Å) | Inner/ outer angle(°) |            | Bending angle(°) |           |           |           | Torsional angle(°) |            |
|---------|-------------|-----------------------|------------|------------------|-----------|-----------|-----------|--------------------|------------|
|         | $d$         | $\alpha_1$            | $\alpha_2$ | $\beta_1$        | $\beta_2$ | $\beta_3$ | $\beta_4$ | $\theta_1$         | $\theta_2$ |
| [2]CHPE | 15.648      | 108.9                 | 115.8      | 4.6              | 5.2       | 5.7       | 5.7       | 35.9               | 32.7       |
| [3]CHPE | 18.021      | 112.5                 | 115.4      | 1.8              | 2.3       | 3.0       | 3.0       | 39.3               | 37.0       |

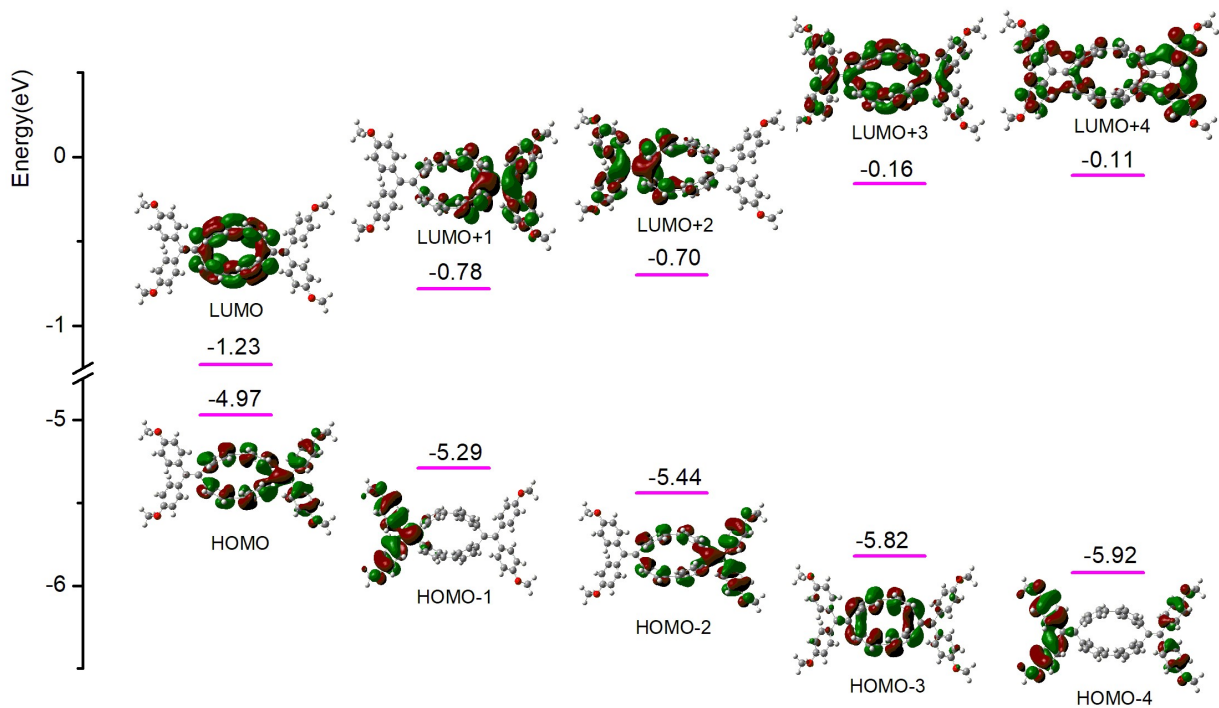

Figure S47. Frontier molecular orbitals of [2]CTPE.

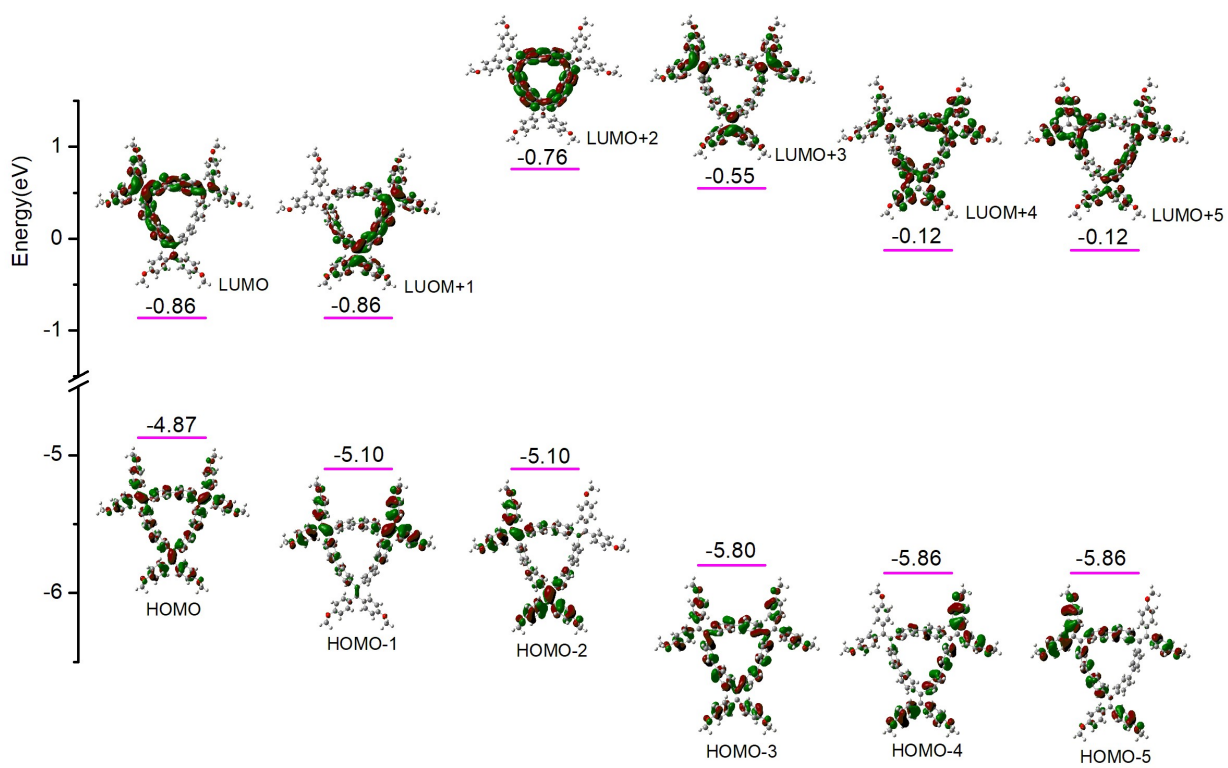

Figure S48. Frontier molecular orbitals of [3]CTPE.

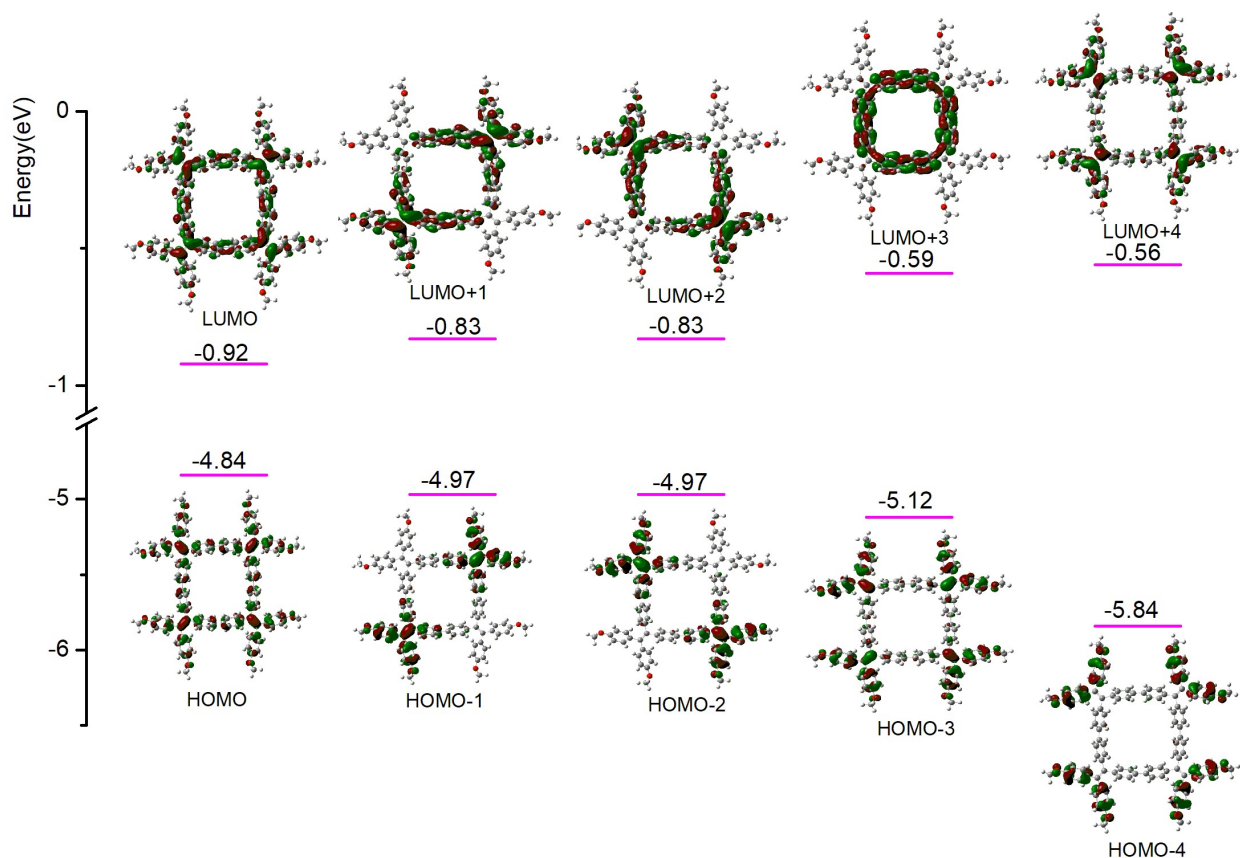

Figure S49. Frontier molecular orbitals of [4]CTPE.

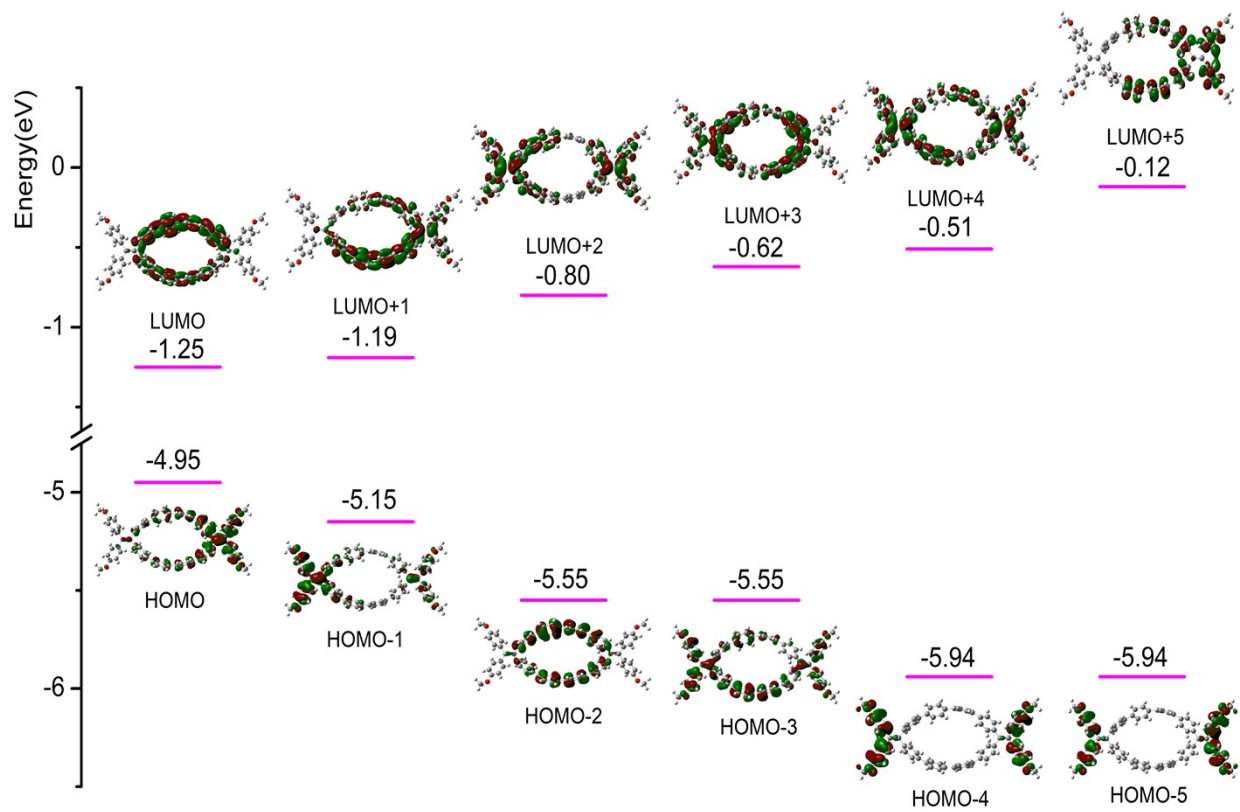

Figure S50. Frontier molecular orbitals of [2]CHPE.



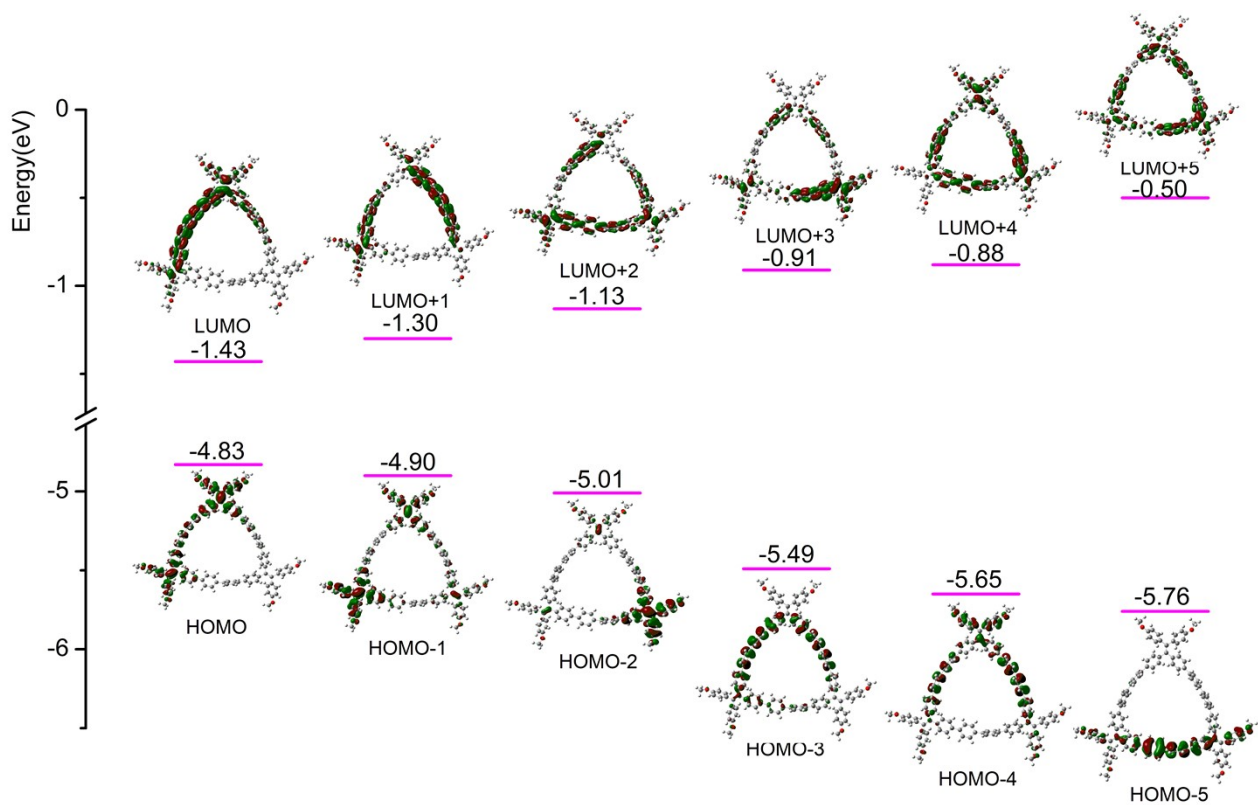

Figure S51. Frontier molecular orbitals of [3]CHPE.

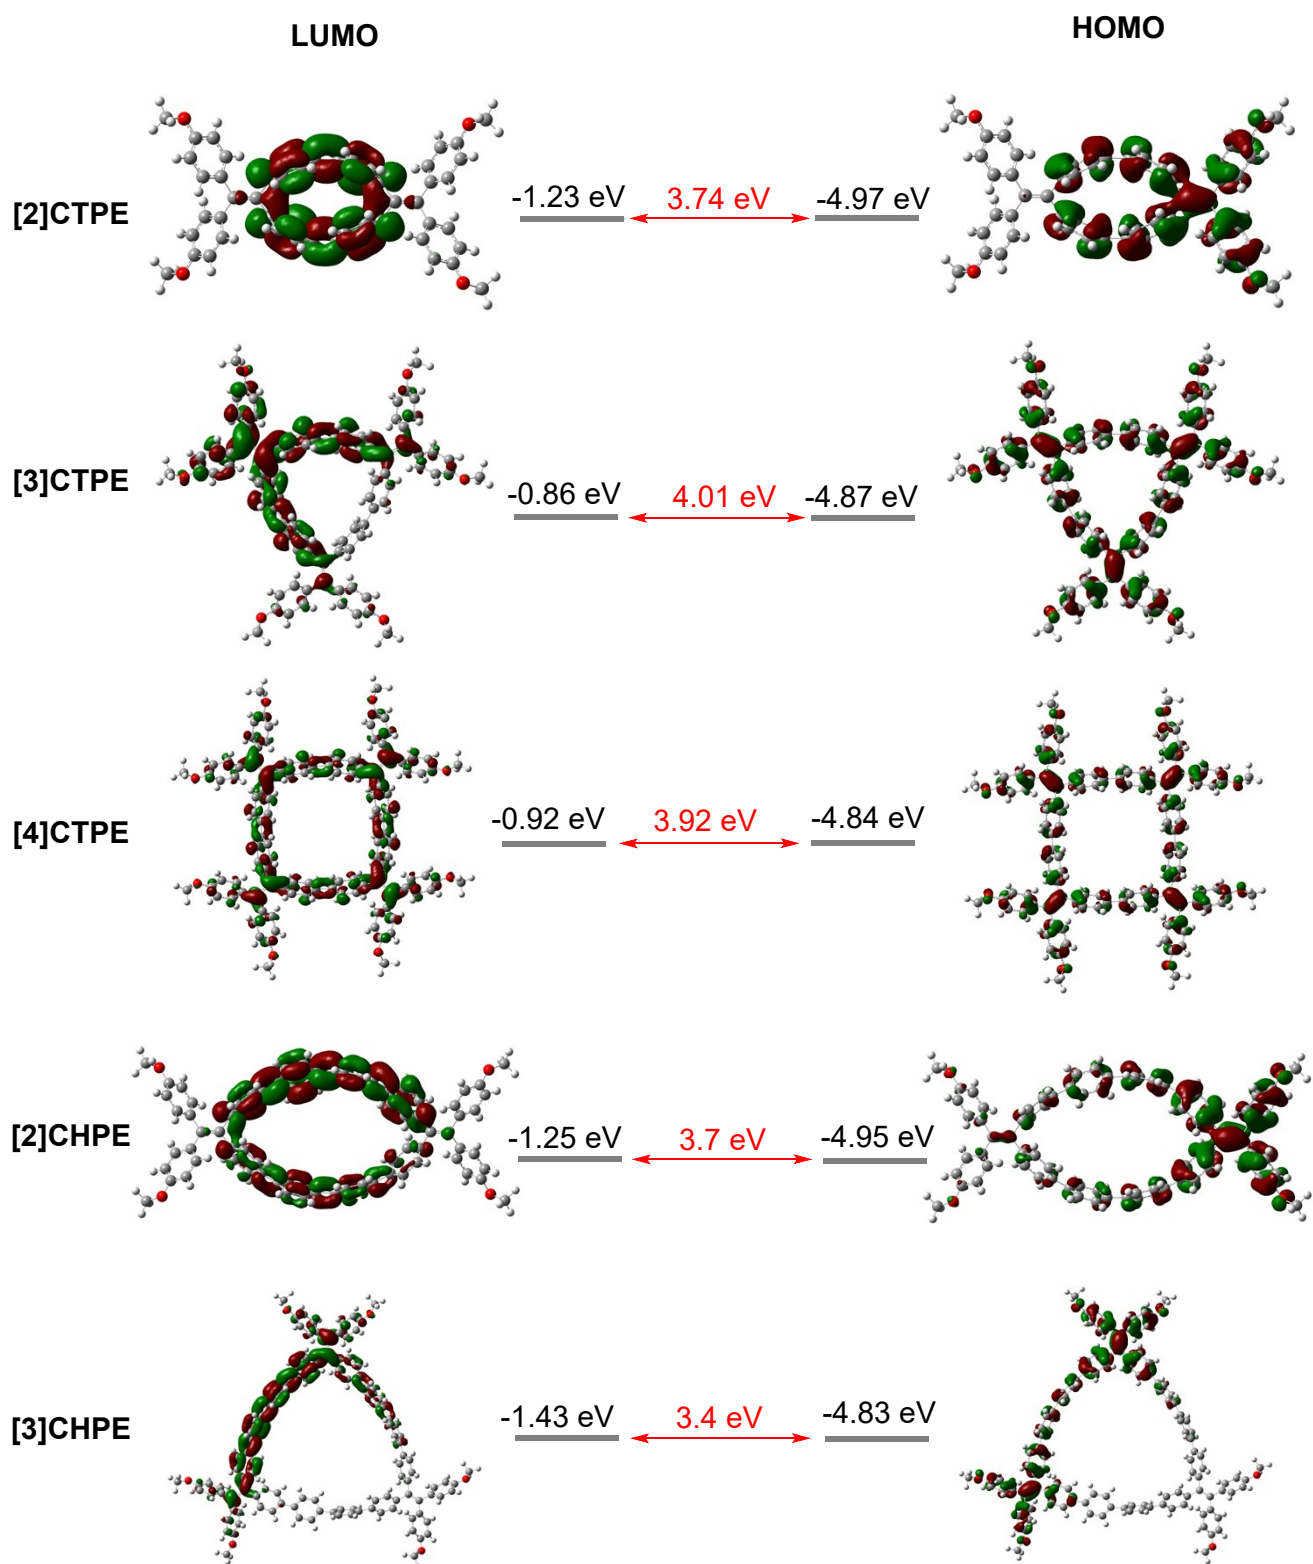

**Figure S52.** Calculated (B3LYP/6-31G(d)) frontier molecular orbital profiles and energy diagram of [2]CTPE, [3]CTPE, [4]CTPE, [2]CHPE, and [3]CHPE.

**Table S3.** Electronic transitions for [2]CTPE determined by TD-DFT methods at B3LYP/6-31G(d) level.

| Excited State                   | Energy (eV) | Excitation (nm) | Oscillator strength (f) | Transition type                                                                                                                                        |
|---------------------------------|-------------|-----------------|-------------------------|--------------------------------------------------------------------------------------------------------------------------------------------------------|
| S <sub>0</sub> →S <sub>1</sub>  | 3.1160      | 397.89          | 0.0009                  | HOMO→LUMO (0.69849)                                                                                                                                    |
| S <sub>0</sub> →S <sub>2</sub>  | 3.5360      | 350.63          | 0.0003                  | HOMO-1→LUMO (0.69725)                                                                                                                                  |
| S <sub>0</sub> →S <sub>3</sub>  | 3.6215      | 342.35          | 0.4727                  | HOMO-1→LUMO+1 (0.68829)                                                                                                                                |
| S <sub>0</sub> →S <sub>4</sub>  | 3.6474      | 339.92          | 0.0061                  | HOMO-2→LUMO (0.69235)                                                                                                                                  |
| S <sub>0</sub> →S <sub>5</sub>  | 3.7390      | 331.60          | 0.2616                  | HOMO-2→LUMO+2 (-0.16605)<br>HOMO→LUMO+2 (0.66183)                                                                                                      |
| S <sub>0</sub> →S <sub>6</sub>  | 4.0223      | 308.24          | 1.0660                  | HOMO-5→LUMO (0.13065)<br>HOMO-3→LUMO (-0.45066)<br>HOMO-2→LUMO+1 (-0.20619)<br>HOMO-1→LUMO+2 (0.46649)                                                 |
| S <sub>0</sub> →S <sub>7</sub>  | 4.0891      | 303.21          | 0.0132                  | HOMO-3→LUMO (0.37571)<br>HOMO-2→LUMO+1 (0.20600)<br>HOMO-1→LUMO+2 (0.50049)<br>HOMO→LUMO+3 (0.19100)                                                   |
| S <sub>0</sub> →S <sub>8</sub>  | 4.1734      | 297.08          | 0.0606                  | HOMO-3→LUMO (-0.16920)<br>HOMO-2→LUMO+1 (0.52684)<br>HOMO-1→LUMO+1 (-0.26278)<br>HOMO→LUMO+3 (-0.28793)                                                |
| S <sub>0</sub> →S <sub>9</sub>  | 4.2031      | 294.99          | 0.0000                  | HOMO-5→LUMO (-0.10183)<br>HOMO-2→LUMO+1 (0.24676)<br>HOMO-1→LUMO+1 (0.62928)                                                                           |
| S <sub>0</sub> →S <sub>10</sub> | 4.2454      | 292.04          | 0.0134                  | HOMO-6→LUMO (0.10755)<br>HOMO-4→LUMO (0.20471)<br>HOMO-3→LUMO (0.51241)<br>HOMO-2→LUMO (0.21778)<br>HOMO-1→LUMO+2 (-0.27336)<br>HOMO→LUMO+3 (-0.17733) |

**Table S4.** Electronic transitions for [3]CTPE determined by TD-DFT methods using B3LYP/6-31G(d).

| Excited State                  | Energy (eV) | Excitation (nm) | Oscillator strength (f) | Transition type                                                                                                               |
|--------------------------------|-------------|-----------------|-------------------------|-------------------------------------------------------------------------------------------------------------------------------|
| S <sub>0</sub> →S <sub>1</sub> | 3.5450      | 349.74          | 1.1871                  | HOMO-2→LUMO+1 (-0.14067)<br>HOMO-2→LUMO+3 (0.10354)<br>HOMO-1→LUMO (-0.13891)<br>HOMO→LUMO (0.55338)<br>HOMO→LUMO+1 (0.34628) |

|                       |        |        |        |                                                                                                                                                                                                                                               |
|-----------------------|--------|--------|--------|-----------------------------------------------------------------------------------------------------------------------------------------------------------------------------------------------------------------------------------------------|
| $S_0 \rightarrow S_2$ | 3.5451 | 349.73 | 1.1869 | HOMO-2 $\rightarrow$ LUMO (-0.14025)<br>HOMO-1 $\rightarrow$ LUMO+1 (0.13921)<br>HOMO-1 $\rightarrow$ LUMO+3 (0.10373)<br>HOMO $\rightarrow$ LUMO (-0.34617)<br>HOMO $\rightarrow$ LUMO+1 (0.55362)                                           |
| $S_0 \rightarrow S_3$ | 3.5721 | 347.09 | 0.0009 | HOMO-2 $\rightarrow$ LUMO+1(0.13454)<br>HOMO-1 $\rightarrow$ LUMO+1(-0.13762)<br>HOMO $\rightarrow$ LUMO+2(0.66615)                                                                                                                           |
| $S_0 \rightarrow S_4$ | 3.7943 | 326.76 | 0.0000 | HOMO-2 $\rightarrow$ LUMO(0.46193)<br>HOMO-1 $\rightarrow$ LUMO+1(0.46363)<br>HOMO $\rightarrow$ LUMO+3(0.25167)                                                                                                                              |
| $S_0 \rightarrow S_5$ | 3.8153 | 324.97 | 0.0094 | HOMO-2 $\rightarrow$ LUMO (0.27761)<br>HOMO-2 $\rightarrow$ LUMO+1(-0.23843)<br>HOMO-1 $\rightarrow$ LUMO (-0.24011)<br>HOMO-1 $\rightarrow$ LUMO+1(-0.27510)<br>HOMO-1 $\rightarrow$ LUMO+2(0.44703)<br>HOMO-2 $\rightarrow$ LUMO (-0.10059) |
| $S_0 \rightarrow S_6$ | 3.8158 | 324.92 | 0.0091 | HOMO-2 $\rightarrow$ LUMO(0.23878)<br>HOMO-2 $\rightarrow$ LUMO+1(0.27504)<br>HOMO-2 $\rightarrow$ LUMO+2(0.44827)<br>HOMO-1 $\rightarrow$ LUMO (0.27661)<br>HOMO-2 $\rightarrow$ LUMO+1(-0.23891)                                            |
| $S_0 \rightarrow S_7$ | 3.9275 | 315.68 | 0.0066 | HOMO-2 $\rightarrow$ LUMO+1(-0.41659)<br>HOMO-1 $\rightarrow$ LUMO (0.51436)<br>HOMO $\rightarrow$ LUMO+2 (0.19970)                                                                                                                           |
| $S_0 \rightarrow S_8$ | 3.9285 | 315.60 | 0.2112 | HOMO-2 $\rightarrow$ LUMO(-0.23836)<br>HOMO-2 $\rightarrow$ LUMO+1(0.21488)<br>HOMO-1 $\rightarrow$ LUMO (0.11928)<br>HOMO-1 $\rightarrow$ LUMO+1(0.23463)<br>HOMO-1 $\rightarrow$ LUMO+2(0.50889)<br>HOMO $\rightarrow$ LUMO(0.22373)        |
| $S_0 \rightarrow S_9$ | 3.9288 | 315.58 | 0.2086 | HOMO-2 $\rightarrow$ LUMO(-0.16841)<br>HOMO-2 $\rightarrow$ LUMO+1(-0.29915)<br>HOMO-2 $\rightarrow$ LUMO+2(0.50632)<br>HOMO-1 $\rightarrow$ LUMO (-0.16879)<br>HOMO-1 $\rightarrow$ LUMO+1(0.17221)<br>HOMO $\rightarrow$ LUMO+1(-0.22233)   |



|                          |        |        |        |                                                                                                                    |
|--------------------------|--------|--------|--------|--------------------------------------------------------------------------------------------------------------------|
| $S_0 \rightarrow S_{10}$ | 3.9940 | 310.43 | 0.0000 | HOMO-2 $\rightarrow$ LUMO(-0.17823)<br>HOMO-1 $\rightarrow$ LUMO+1(-0.17981)<br>HOMO $\rightarrow$ LUMO+3(0.64739) |
|--------------------------|--------|--------|--------|--------------------------------------------------------------------------------------------------------------------|

**Table S5.** Electronic transitions for [4]CTPE determined by TD-DFT methods using B3LYP/6-31G(d).

| Excited State         | Energy (eV) | Excitation (nm) | Oscillator strength (f) | Transition type                                                                                                                                                |
|-----------------------|-------------|-----------------|-------------------------|----------------------------------------------------------------------------------------------------------------------------------------------------------------|
| $S_0 \rightarrow S_1$ | 3.4821      | 356.06          | 0.0000                  | HOMO-2 $\rightarrow$ LUMO+2 (0.25546)<br>HOMO-1 $\rightarrow$ LUMO+1 (-0.25552)<br>HOMO $\rightarrow$ LUMO (0.59603)                                           |
| $S_0 \rightarrow S_2$ | 3.5382      | 350.42          | 1.7428                  | HOMO-3 $\rightarrow$ LUMO+1 (-0.11953)<br>HOMO-2 $\rightarrow$ LUMO (-0.39969)<br>HOMO-2 $\rightarrow$ LUMO+4 (0.11937)<br>HOMO $\rightarrow$ LUMO+1 (0.53981) |
| $S_0 \rightarrow S_3$ | 3.5382      | 350.41          | 1.7429                  | HOMO-3 $\rightarrow$ LUMO+2 (0.11954)<br>HOMO-2 $\rightarrow$ LUMO (0.39969)<br>HOMO-2 $\rightarrow$ LUMO+4 (0.11939)<br>HOMO $\rightarrow$ LUMO+2 (0.53980)   |
| $S_0 \rightarrow S_4$ | 3.6833      | 336.61          | 0.0013                  | HOMO-2 $\rightarrow$ LUMO+1 (0.33263)<br>HOMO-1 $\rightarrow$ LUMO+2 (-0.33260)<br>HOMO $\rightarrow$ LUMO+3 (0.48573)                                         |
| $S_0 \rightarrow S_5$ | 3.7239      | 332.95          | 0.0000                  | HOMO-3 $\rightarrow$ LUMO (0.35353)<br>HOMO-2 $\rightarrow$ LUMO+2 (0.39850)<br>HOMO-1 $\rightarrow$ LUMO+1 (0.39857)<br>HOMO $\rightarrow$ LUMO+4 (0.19245)   |
| $S_0 \rightarrow S_6$ | 3.7622      | 329.55          | 0.0018                  | HOMO-3 $\rightarrow$ LUMO+1 (0.20830)<br>HOMO-2 $\rightarrow$ LUMO+3 (0.16722)<br>HOMO-1 $\rightarrow$ LUMO (0.50938)<br>HOMO $\rightarrow$ LUMO+1 (0.38734)   |
| $S_0 \rightarrow S_7$ | 3.7622      | 329.55          | 0.0018                  | HOMO-3 $\rightarrow$ LUMO+2 (0.20829)<br>HOMO-2 $\rightarrow$ LUMO (0.50938)<br>HOMO-1 $\rightarrow$ LUMO+3 (0.16725)<br>HOMO $\rightarrow$ LUMO+2 (-0.38734)  |
| $S_0 \rightarrow S_8$ | 3.7936      | 326.82          | 0.0000                  | HOMO-3 $\rightarrow$ LUMO+3 (0.18599)<br>HOMO-2 $\rightarrow$ LUMO+1 (0.47440)<br>HOMO-1 $\rightarrow$ LUMO+2 (0.47439)                                        |
| $S_0 \rightarrow S_9$ | 3.8250      | 324.14          | 0.0000                  | HOMO-3 $\rightarrow$ LUMO+4 (0.10268)<br>HOMO-2 $\rightarrow$ LUMO+2 (0.41586)                                                                                 |

|                                 |        |        |        |                          |
|---------------------------------|--------|--------|--------|--------------------------|
|                                 |        |        |        | HOMO-1→LUMO+1 (-0.41582) |
|                                 |        |        |        | HOMO→LUMO (-0.37618)     |
| S <sub>0</sub> →S <sub>10</sub> | 3.9191 | 316.36 | 0.0000 | HOMO-2→LUMO+1 (-0.35154) |
|                                 |        |        |        | HOMO-1→LUMO+2 (0.35159)  |
|                                 |        |        |        | HOMO→LUMO+3 (0.48106)    |

**Table S6.** Electronic transitions for [2]CHPE determined by TD-DFT methods using B3LYP/6-31G(d).

| Excited State                  | Energy (eV) | Excitation (nm) | Oscillator strength (f) | Transition type          |
|--------------------------------|-------------|-----------------|-------------------------|--------------------------|
| S <sub>0</sub> →S <sub>1</sub> | 3.2389      | 382.80          | 0.1742                  | HOMO→LUMO+1 (0.68038)    |
| S <sub>0</sub> →S <sub>2</sub> | 3.3235      | 373.05          | 1.7186                  | HOMO→LUMO+1 (0.68038)    |
| S <sub>0</sub> →S <sub>3</sub> | 3.4915      | 355.10          | 0.1426                  | HOMO-1→LUMO (0.66737)    |
|                                |             |                 |                         | HOMO→LUMO (-0.10219)     |
|                                |             |                 |                         | HOMO→LUMO +3 (0.11253)   |
| S <sub>0</sub> →S <sub>4</sub> | 3.6060      | 343.83          | 0.2873                  | HOMO-1→LUMO+1 (0.64192)  |
|                                |             |                 |                         | HOMO-1→LUMO+2 (0.17515)  |
|                                |             |                 |                         | HOMO→LUMO+2 (0.18988)    |
| S <sub>0</sub> →S <sub>5</sub> | 3.7858      | 327.50          | 0.5883                  | HOMO-3→LUMO (-0.20745)   |
|                                |             |                 |                         | HOMO-2→LUMO (0.57412)    |
|                                |             |                 |                         | HOMO-2→LUMO+1 (0.27415)  |
|                                |             |                 |                         | HOMO→LUMO (0.10909)      |
| S <sub>0</sub> →S <sub>6</sub> | 3.8127      | 325.19          | 0.0535                  | HOMO-2→LUMO+1 (-0.13428) |
|                                |             |                 |                         | HOMO-1→LUMO+1 (-0.18483) |
|                                |             |                 |                         | HOMO-1→LUMO +4 (0.10030) |
|                                |             |                 |                         | HOMO →LUMO+2 (0.61829)   |
| S <sub>0</sub> →S <sub>7</sub> | 3.8407      | 322.82          | 0.8255                  | HOMO-3→LUMO (-0.30516)   |
|                                |             |                 |                         | HOMO-3→LUMO+1 (0.11777)  |
|                                |             |                 |                         | HOMO-2→LUMO (-0.32346)   |
|                                |             |                 |                         | HOMO-2→LUMO+1 (0.44312)  |
|                                |             |                 |                         | HOMO-1→LUMO+1 (-0.12384) |
|                                |             |                 |                         | HOMO-1→LUMO+2 (0.17028)  |
|                                |             |                 |                         | HOMO→LUMO+2 (0.14285)    |
| S <sub>0</sub> →S <sub>8</sub> | 3.9114      | 316.98          | 0.0895                  | HOMO-3→LUMO (0.45863)    |
|                                |             |                 |                         | HOMO-2→LUMO+1 ( 0.34313) |
|                                |             |                 |                         | HOMO-1→LUMO+2 (-0.11180) |
|                                |             |                 |                         | HOMO→LUMO +3 (0.34986)   |
| S <sub>0</sub> →S <sub>9</sub> | 3.9498      | 313.90          | 0.0395                  | HOMO-3→LUMO (-0.31683)   |
|                                |             |                 |                         | HOMO-2→LUMO+1 (-0.19573) |

|                                 |        |        |        |                          |
|---------------------------------|--------|--------|--------|--------------------------|
|                                 |        |        |        | HOMO-1→LUMO+2 (-0.15600) |
|                                 |        |        |        | HOMO-1→LUMO+3 (0.10473)  |
|                                 |        |        |        | HOMO→LUMO+3 (0.52616)    |
|                                 |        |        |        | HOMO-2→LUMO (0.18701)    |
|                                 |        |        |        | HOMO-2→LUMO+1 (-0.10329) |
|                                 |        |        |        | HOMO-1→LUMO+2 (0.49702)  |
| S <sub>0</sub> →S <sub>10</sub> | 3.9826 | 311.31 | 0.0381 | HOMO-1→LUMO+4 (0.12273)  |
|                                 |        |        |        | HOMO→LUMO+2 (-0.10033)   |
|                                 |        |        |        | HOMO→LUMO+3 (0.18171)    |
|                                 |        |        |        | HOMO→LUMO+4 (0.31787)    |

**Table S7.** Electronic transitions for [3]CHPE determined by TD-DFT methods using B3LYP/6-31G(d).

| Excited State                  | Energy (eV) | Excitation (nm) | Oscillator strength (f) | Transition type                                                                                                                                                                                                                          |
|--------------------------------|-------------|-----------------|-------------------------|------------------------------------------------------------------------------------------------------------------------------------------------------------------------------------------------------------------------------------------|
| S <sub>0</sub> →S <sub>1</sub> | 2.9799      | 416.07          | 1.9933                  | HOMO-1→LUMO+1 (-0.18065)<br>HOMO→LUMO (0.65760)                                                                                                                                                                                          |
| S <sub>0</sub> →S <sub>2</sub> | 3.0764      | 403.02          | 0.7152                  | HOMO-1→LUMO (0.69725)<br>HOMO-1→LUMO+1(-0.44964)                                                                                                                                                                                         |
| S <sub>0</sub> →S <sub>3</sub> | 3.1865      | 389.09          | 0.2306                  | HOMO-2→LUMO (0.13830)<br>HOMO-1→LUMO (-0.33396)<br>HOMO-1→LUMO+1 (0.39746)<br>HOMO→LUMO+1 (-0.36239)<br>HOMO→LUMO+2 (0.20907)<br>HOMO→LUMO+3 (-0.11405)                                                                                  |
| S <sub>0</sub> →S <sub>4</sub> | 3.3006      | 375.64          | 0.1261                  | HOMO-2→LUMO (0.24545)<br>HOMO-2→LUMO+1 (0.24240)<br>HOMO-2→LUMO+2 (-0.13603)<br>HOMO-1→LUMO (0.29429)<br>HOMO-1→LUMO+1 (0.29087)<br>HOMO-1→LUMO+2 (0.11603)<br>HOMO-1→LUMO+3 (0.10548)<br>HOMO→LUMO+1 (0.30805)<br>HOMO→LUMO+2 (0.21142) |
| S <sub>0</sub> →S <sub>5</sub> | 3.3351      | 371.75          | 0.6135                  | HOMO-2→LUMO (-0.33732)<br>HOMO-2→LUMO+1 (-0.30712)<br>HOMO-2→LUMO+2 (0.13064)<br>HOMO-2→LUMO+3 (0.10084)<br>HOMO-1→LUMO+2 (0.34495)                                                                                                      |

|                          |        |        |        |                          |
|--------------------------|--------|--------|--------|--------------------------|
|                          |        |        |        | HOMO→LUMO+2 (0.27890)    |
|                          |        |        |        | HOMO→LUMO+4 (0.12058)    |
| $S_0 \rightarrow S_6$    | 3.4065 | 363.97 | 0.1158 | HOMO-2→LUMO (-0.29257)   |
|                          |        |        |        | HOMO-1→LUMO+1 (0.43205)  |
|                          |        |        |        | HOMO-1→LUMO+2 (-0.16677) |
|                          |        |        |        | HOMO-1→LUMO+4 (-0.12214) |
|                          |        |        |        | HOMO→LUMO (0.16879)      |
|                          |        |        |        | HOMO→LUMO+1 (0.16451)    |
|                          |        |        |        | HOMO→LUMO+2 (-0.33667)   |
| $S_0 \rightarrow S_7$    | 3.4462 | 359.77 | 0.0303 | HOMO-2→LUMO (-0.44578)   |
|                          |        |        |        | HOMO-2→LUMO+1 (0.46344)  |
|                          |        |        |        | HOMO-2→LUMO+2 (-0.14636) |
|                          |        |        |        | HOMO-1→LUMO (-0.13560)   |
|                          |        |        |        | HOMO→LUMO+2 (0.13174)    |
| $S_0 \rightarrow S_8$    | 3.4750 | 356.79 | 0.3749 | HOMO-2→LUMO+1 (0.21285)  |
|                          |        |        |        | HOMO-2→LUMO+2 (0.13023)  |
|                          |        |        |        | HOMO-2→LUMO+3 (0.20785)  |
|                          |        |        |        | HOMO-1→LUMO+2 (0.44171)  |
|                          |        |        |        | HOMO→LUMO+1 (-0.10470)   |
|                          |        |        |        | HOMO→LUMO+2 (-0.35980)   |
|                          |        |        |        | HOMO→LUMO+4 (0.11874)    |
| $S_0 \rightarrow S_9$    | 3.5373 | 350.50 | 0.0503 | HOMO-2→LUMO+1 (0.16886)  |
|                          |        |        |        | HOMO-2→LUMO+2 (0.47384)  |
|                          |        |        |        | HOMO-2→LUMO+3 (0.27825)  |
|                          |        |        |        | HOMO-1→LUMO+2 (-0.20028) |
|                          |        |        |        | HOMO-1→LUMO+3 (0.22668)  |
|                          |        |        |        | HOMO→LUMO+2 (0.11220)    |
|                          |        |        |        | HOMO→LUMO+3 (-0.11192)   |
|                          |        |        |        | HOMO→LUMO+4 (-0.13454)   |
| $S_0 \rightarrow S_{10}$ | 3.6622 | 338.55 | 0.0284 | HOMO-1→LUMO+2 (-0.20311) |
|                          |        |        |        | HOMO-1→LUMO+3 (0.19913)  |
|                          |        |        |        | HOMO→LUMO+3 (0.31410)    |
|                          |        |        |        | HOMO→LUMO+4 (0.53081)    |

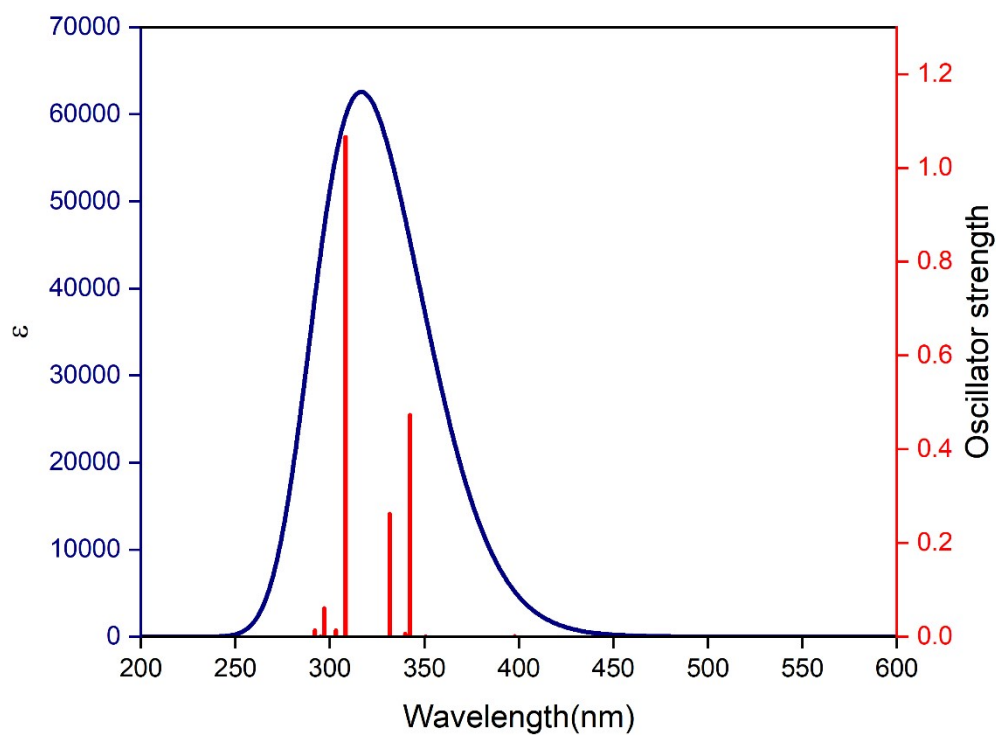

**Figure S53.** Calculated electronic absorption spectrum (B3LYP/6-31G(d)) of **[2]CTPE**.

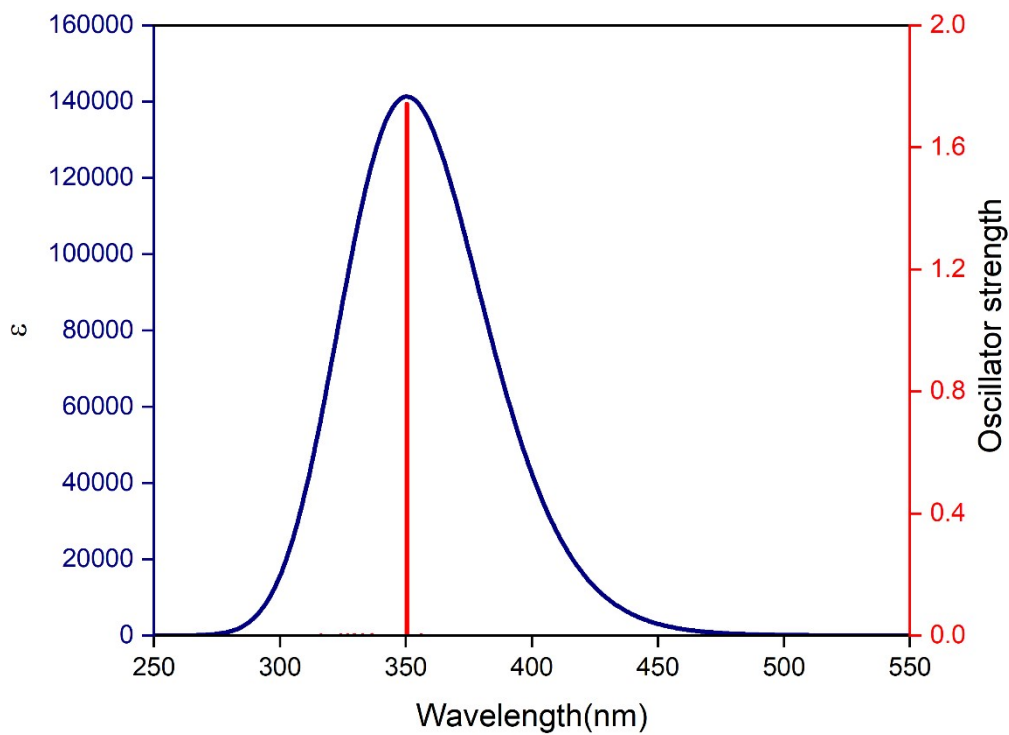

**Figure S54.** Calculated electronic absorption spectrum (B3LYP/6-31G(d)) of **[3]CTPE**.

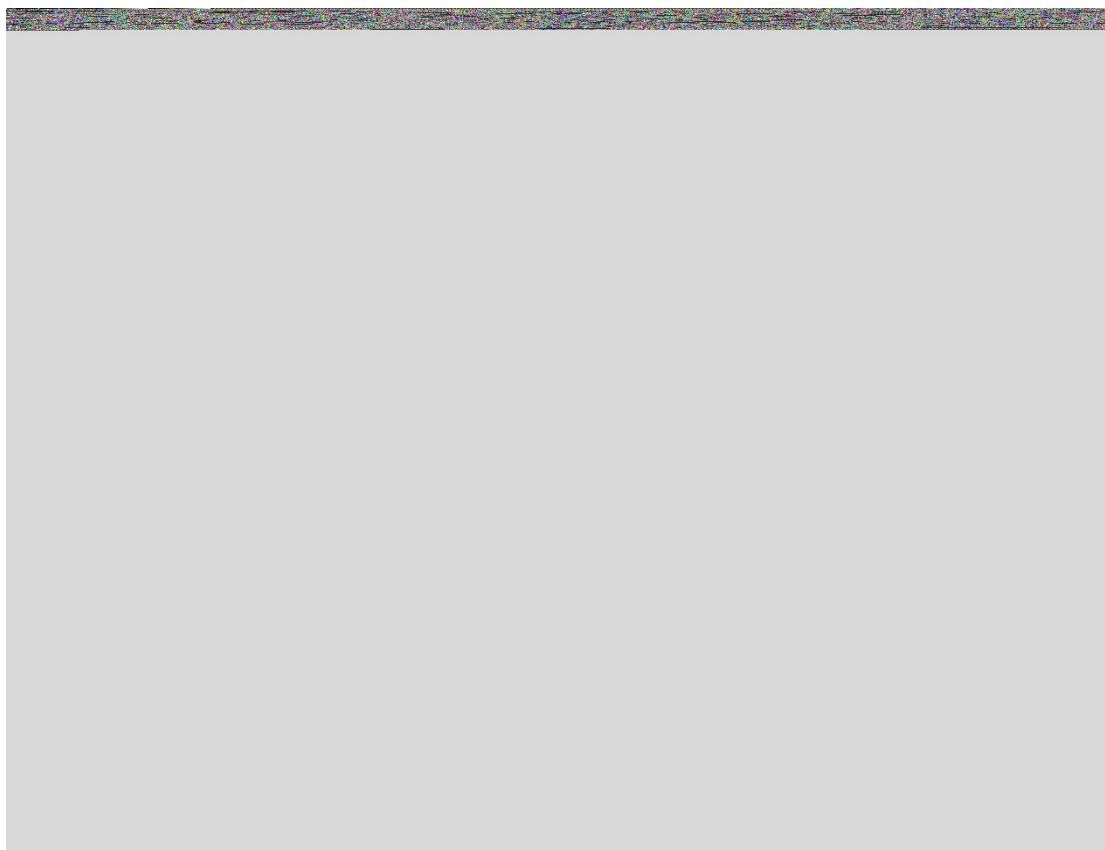

**Figure S55.** Calculated electronic absorption spectrum (B3LYP/6-31G(d)) of **[4]CTPE**.

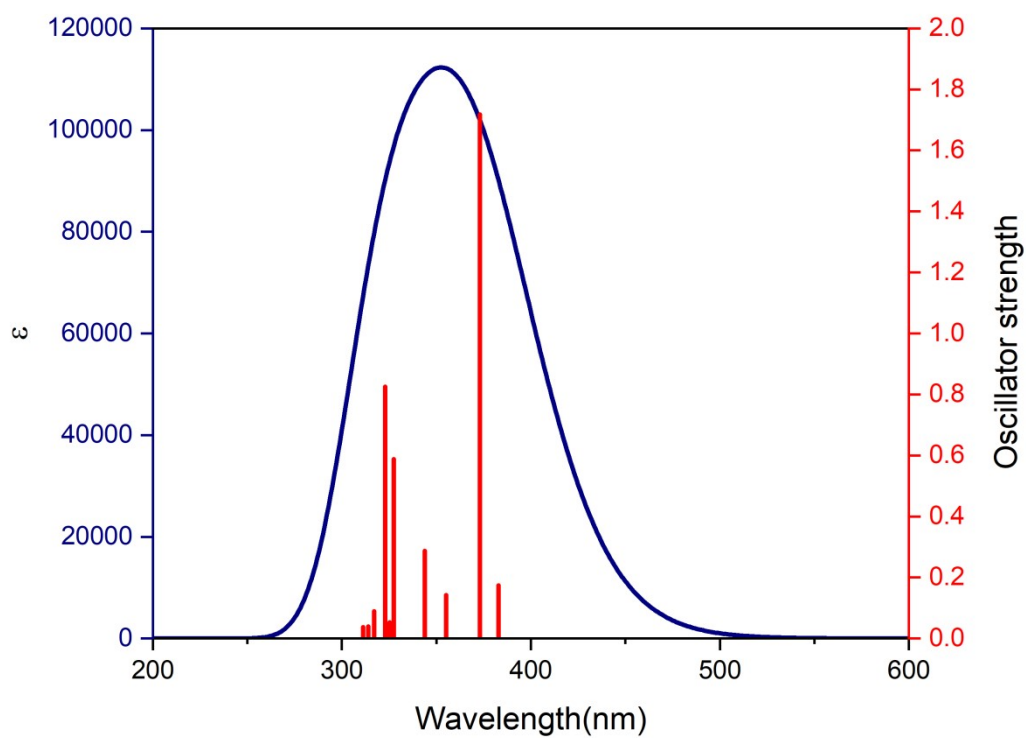

**Figure S56.** Calculated electronic absorption spectrum (B3LYP/6-31G(d)) of **[2]CHPE**.

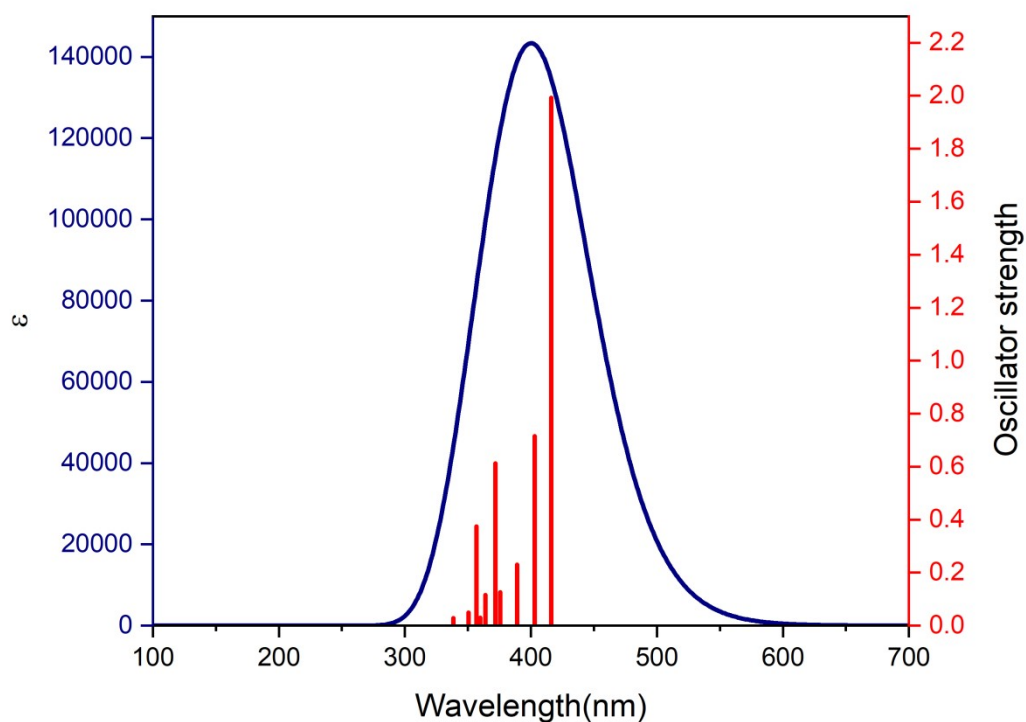

**Figure S57.** Calculated electronic absorption spectrum (B3LYP/6-31G(d)) of **[3]CHPE**.

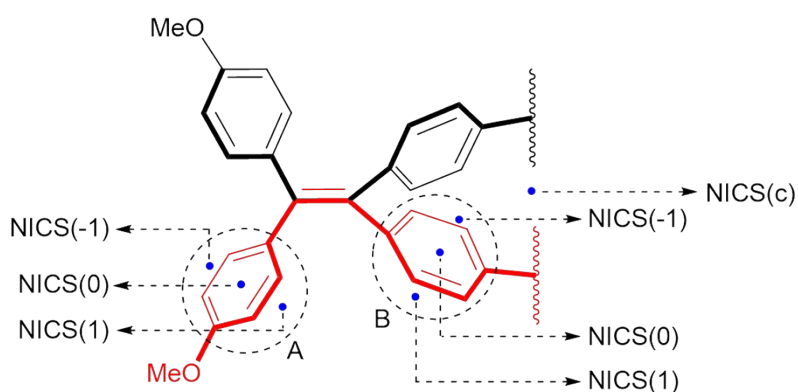

| molecule | ring A   |         |         | ring B   |         |         | geometric center |
|----------|----------|---------|---------|----------|---------|---------|------------------|
|          | NICS(-1) | NICS(0) | NICS(1) | NICS(-1) | NICS(0) | NICS(1) | NICS(c)          |
| [2]CTPE  | -9.1     | -8.3    | -9.0    | -11.1    | -7.6    | -8.2    | -5.5             |
| [3]CTPE  | -9.1     | -8.2    | -9.0    | -10.4    | -7.8    | -8.6    | -2.6             |
| [4]CTPE  | -9.1     | -8.4    | -9.2    | -9.8     | -7.7    | -8.9    | -1.6             |

**Figure S58.** Calculated NICS values (ppm) of **[2]CTPE**, **[3]CTPE** and **[4]CTPE**. NICS(0) means NICS value at the center of a benzene ring (A, B), NICS(1) NICS(-1) means NICS value at the position 1 Å perpendicularly to the benzene ring (A, B) as shown in the above. NICS(c) means NICS value at the geometric center of the CTPE.

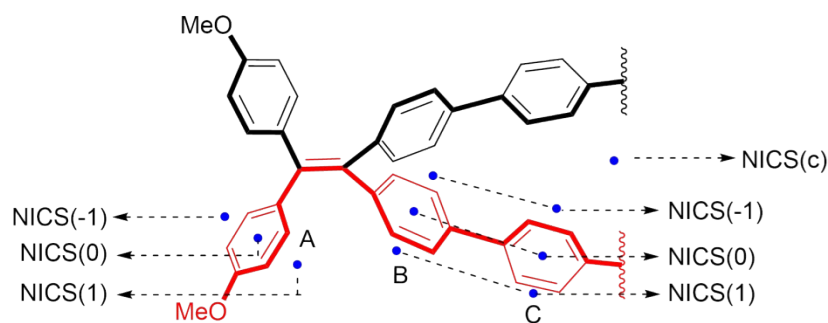

| [2]CHPE          |          |       | [3]CHPE          |          |      |
|------------------|----------|-------|------------------|----------|------|
| ring A           | NICS(-1) | -9.2  | ring A           | NICS(-1) | -9.0 |
|                  | NICS(0)  | -8.2  |                  | NICS(0)  | -8.0 |
|                  | NICS(1') | -9.0  |                  | NICS(1)  | -8.9 |
| ring B           | NICS(-1) | -10.3 | ring B           | NICS(-1) | -8.8 |
|                  | NICS(0)  | -7.6  |                  | NICS(0)  | -6.4 |
|                  | NICS(1)  | -8.4  |                  | NICS(1)  | -7.8 |
| ring C           | NICS(-1) | -9.9  | ring C           | NICS(-1) | -8.7 |
|                  | NICS(0)  | -6.7  |                  | NICS(0)  | -5.9 |
|                  | NICS(1)  | -7.9  |                  | NICS(1)  | -7.7 |
| geometric center | NICS(c)  | -2.2  | geometric center | NICS(c)  | -0.6 |

**Figure S59.** Calculated NICS values (ppm) of [2]CHPE, [3]CHPE. NICS(0) means NICS value at the center of a benzene ring (A, B), NICS(1) NICS(-1) means NICS value at the position 1 Å perpendicularly to the benzene ring (A, B, C) as shown above. NICS(c) means NICS value at the geometric center of the CHPE.

**Table S8.** Uncorrected and thermal-corrected (298K) energies of stationary points (Hartree).<sup>[a]</sup>

| compound  | E            | E + ZPE      | H            | G            |
|-----------|--------------|--------------|--------------|--------------|
| [2]CTPE   | -2461.220097 | -2460.377102 | -2460.325717 | -2460.466585 |
| [3]CTPE   | -3691.940968 | -3690.675267 | -3690.597032 | -3690.800284 |
| [4]CTPE   | -4922.620514 | -4920.932630 | -4920.827536 | -4921.094918 |
| TPE-1     | -1231.851082 | -1231.408480 | -1231.381759 | -1231.466358 |
| [2]OTPE-1 | -2462.511709 | -2461.646567 | -2461.593382 | -2461.741467 |
| [2]CHPE   | -3385.496128 | -3384.328404 | -3384.258156 | -3384.441383 |
| [3]CHPE   | -5078.303968 | -5076.551042 | -5076.444883 | -5076.711896 |
| TPE-2     | -1693.966631 | -1693.362030 | -1693.325850 | -1693.433591 |
| [2]OHPE-2 | -3386.742619 | -3385.553508 | -3385.481399 | -3385.675676 |

[a] E = electronic energy; ZPE = zero-point-energy; H (= E+ZPE+E<sub>vib</sub>+E<sub>rot</sub>+E<sub>trans</sub>+RT): sum of electronic and thermal enthalpies; G(=H-TS): sum of electronic and thermal free energies.



**Table S9.** Strain energies (SE, kJ mol<sup>-1</sup>) of [n] CTPEs and [n]CHPEs based on Homodesmotic Reaction.

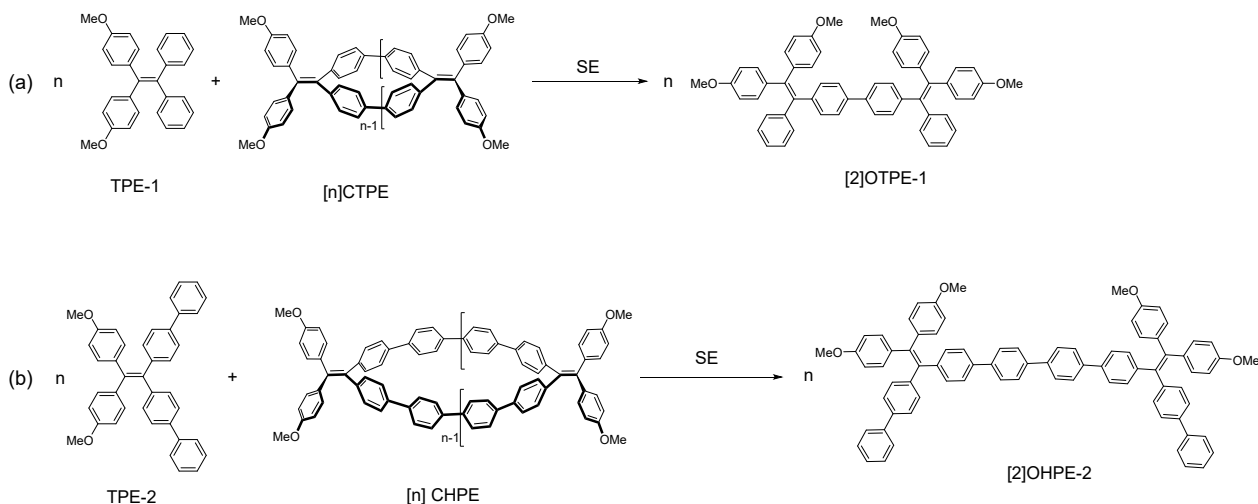

| [n]CTPE | Strain energy [a] |
|---------|-------------------|
| 2       | 256.06            |
| 3       | 99.34             |
| 4       | 49.77             |
| [n]CHPE | Strain energy [b] |
| 2       | 139.00            |
| 3       | 57.14             |

[a] Calculated based on (a); [b] Calculated based on (b).

## 7. Photophysical Measurements

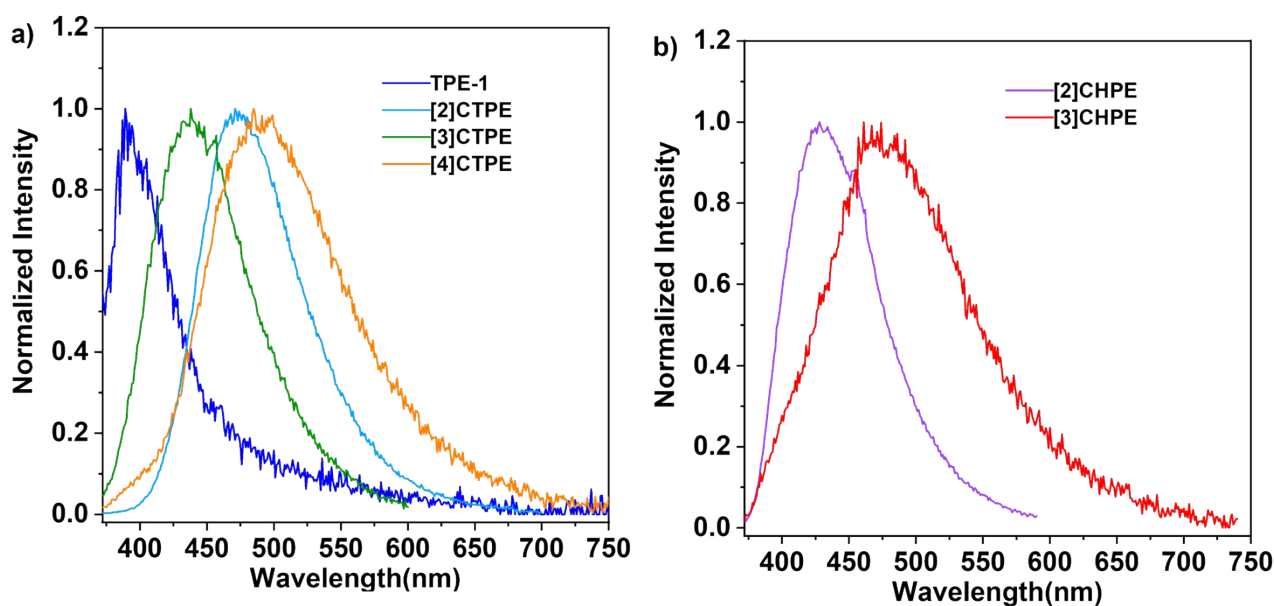

**Figure S60.** PL spectra of compounds in THF solution. (Concentration: 50  $\mu$ M for TPE-1; 10  $\mu$ M for [2]CTPE, [3]CTPE, [4]CTPE, [2]CHPE, and [3]CHPE).

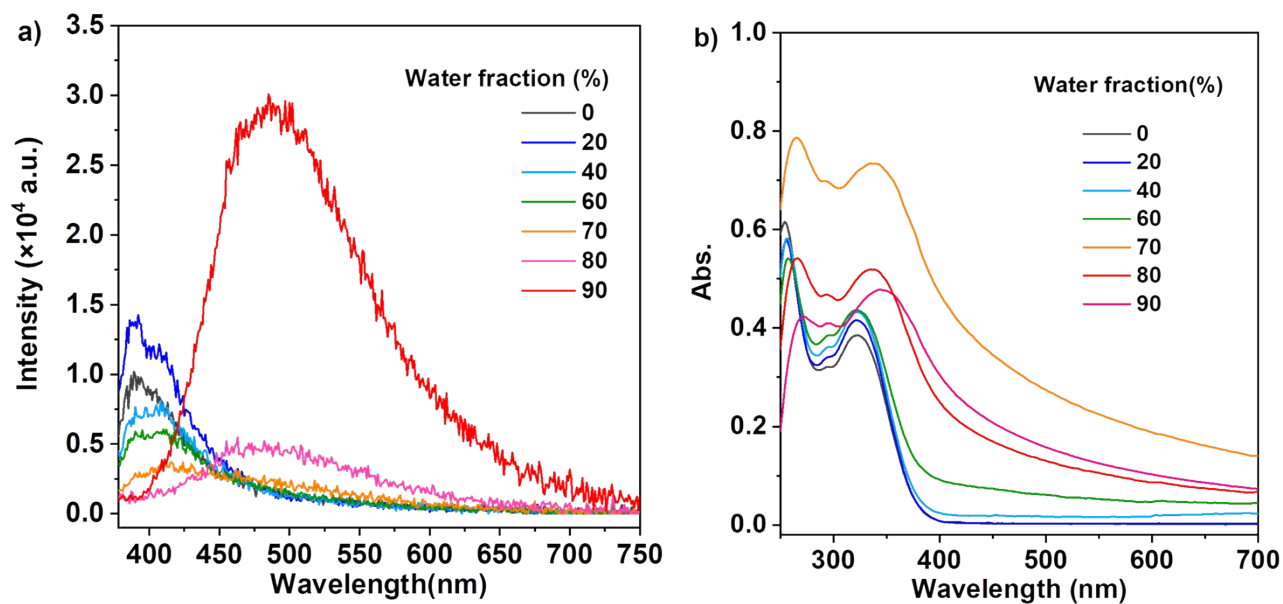

**Figure S61.** a) PL spectra of TPE-1 in water/THF mixture with different water fractions. The inset is the fluorescence images of TPE-1 in pure THF and in water/THF mixture with 90% water fraction. (Concentration: 50  $\mu$ M). b) UV-Vis spectra.

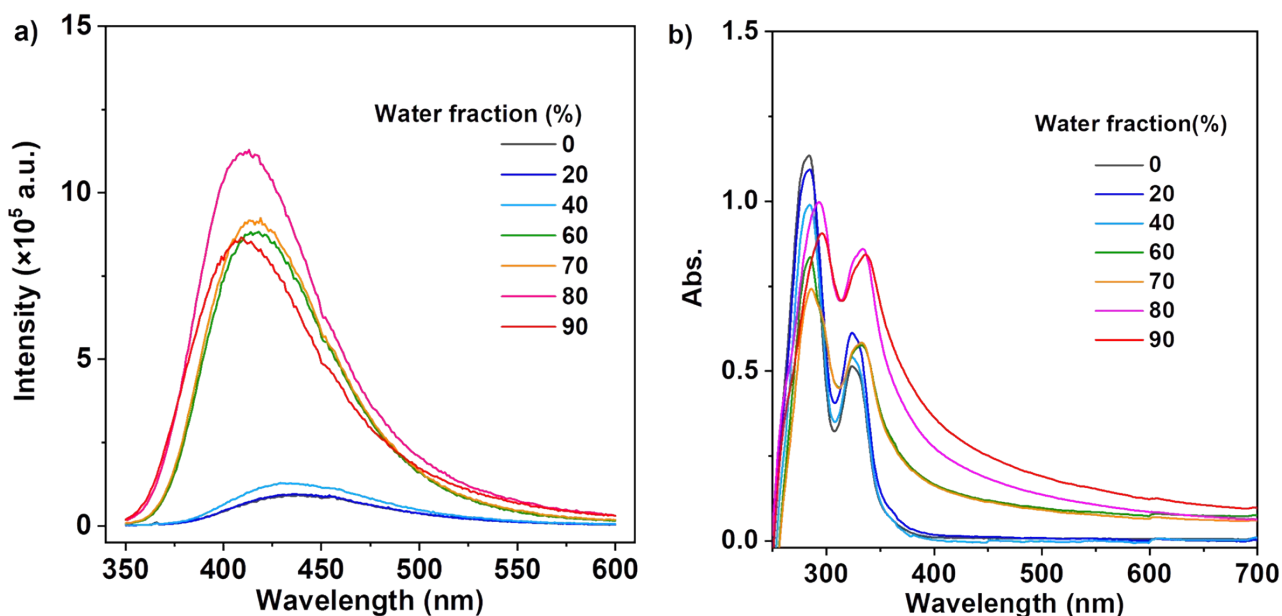

**Figure 62.** a) PL spectra of [3]CTPE in water/THF mixture with different water fractions. The inset is the fluorescence image of [3]CTPE in pure THF and in water/THF mixture with 90% water fraction. (Concentration: 10  $\mu$ M). b) UV-Vis spectra.

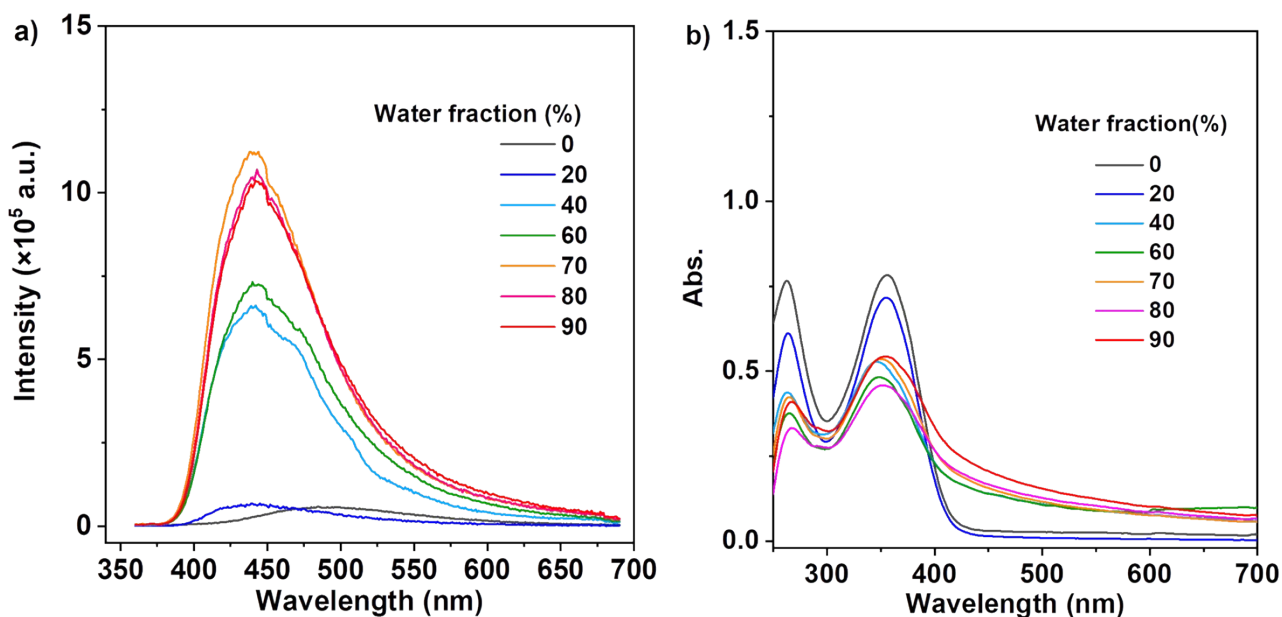

**Figure S63.** a) PL spectra of [4]CTPE in water/THF mixture with different water fractions. The inset is the fluorescence image of [4]CTPE in pure THF and in water/THF mixture with 90% water fraction. (Concentration: 10  $\mu$ M). b) UV-Vis spectra.

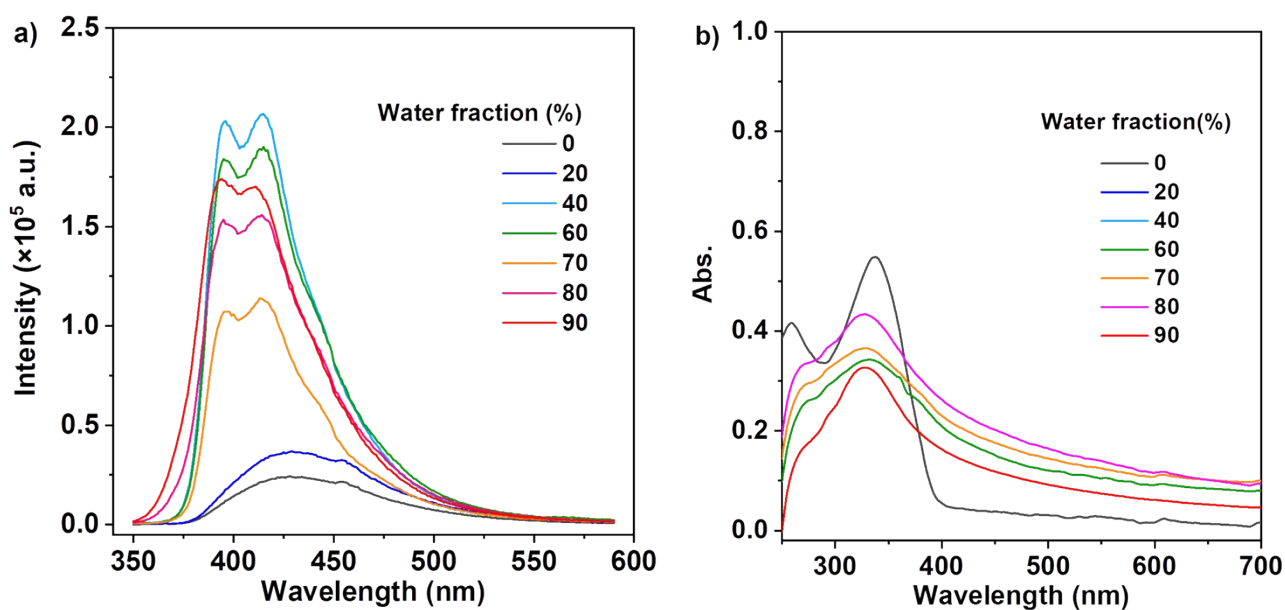

**Figure S64.** a) PL spectra of [2]CHPE in water/THF mixture with different water fractions. The inset is the fluorescence image of [2]CHPE in pure THF and in water/THF mixture with 90% water fraction. (Concentration: 10  $\mu$ M). b) UV-Vis spectra.

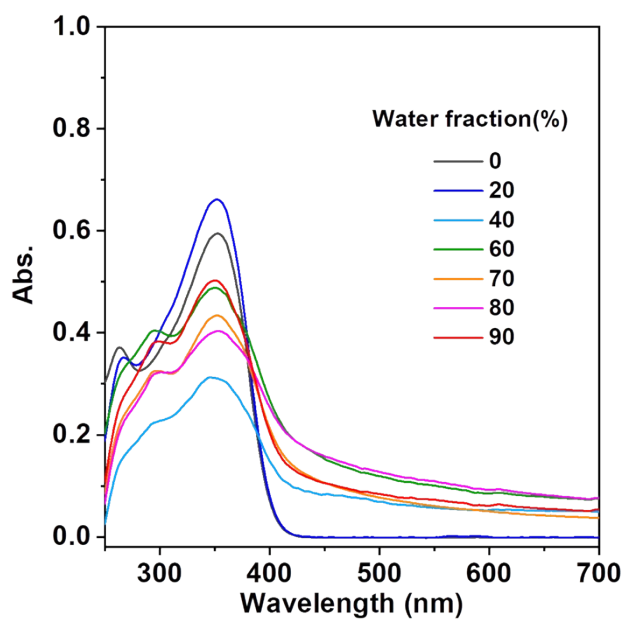

**Figure S65.** UV-Vis spectra of [3]CHPE in water/THF mixture with different water fractions. The inset is the fluorescence image of [3]CHPE in pure THF and in water/THF mixture with 90% water fraction. (Concentration: 10  $\mu$ M).

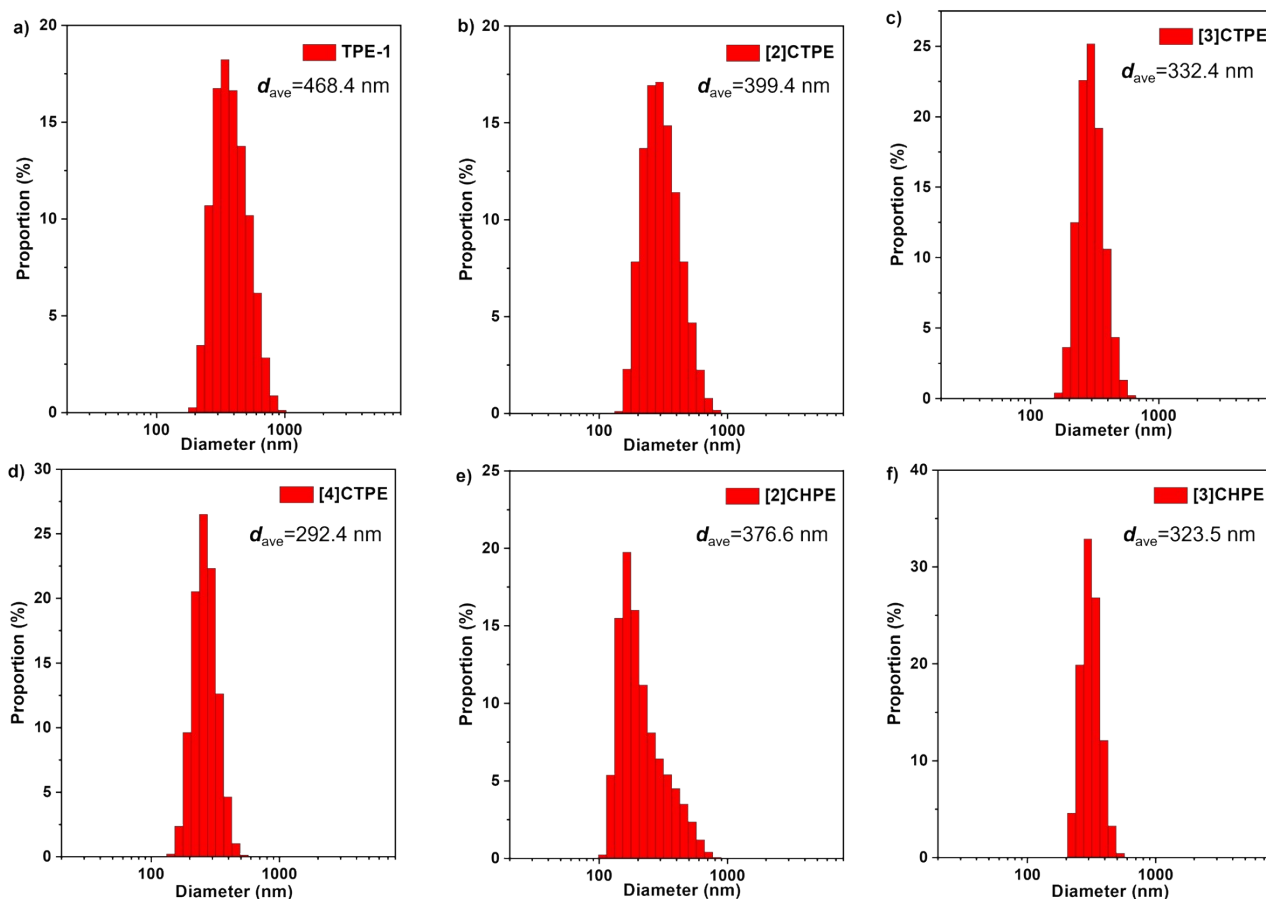

**Figure S66.** Effective diameters of the compounds in water/THF mixtures with 90% water fraction. Concentration: 50  $\mu$ M in THF for TPE-1; 10  $\mu$ M for [2]CTPE, [3]CTPE, [4]CTPE, [2]CHPE, and [3]CHPE.

## Cartesian Coordinates of the Optimized Structures

### [2]CTPE

|   |             |             |             |
|---|-------------|-------------|-------------|
| C | -2.82782535 | 1.79892275  | -1.11813886 |
| C | -1.57861009 | 2.41519991  | -1.16979535 |
| C | -0.72723294 | 2.42037817  | -0.04962170 |
| C | -1.30474327 | 2.04430273  | 1.17764669  |
| C | -2.56308525 | 1.44929372  | 1.23152987  |
| C | -3.29780006 | 1.19782327  | 0.06202204  |
| H | -3.38604424 | 1.67557337  | -2.04287364 |
| H | -1.21929098 | 2.78728332  | -2.12549769 |
| H | -0.70454320 | 2.06574743  | 2.08251762  |
| H | -2.91130586 | 1.04348556  | 2.17748101  |
| C | 0.75743499  | 2.40623526  | -0.18945864 |
| C | 1.64137764  | 2.57731075  | 0.89236692  |
| C | 1.29853052  | 1.83838974  | -1.35851956 |
| C | 2.90230939  | 1.97374209  | 0.89659193  |
| H | 1.30623798  | 3.09332632  | 1.78868882  |
| C | 2.55060234  | 1.23829871  | -1.35288157 |
| H | 0.67299670  | 1.71361785  | -2.23636856 |
| C | 3.32658764  | 1.18302086  | -0.18402192 |
| H | 3.50922717  | 2.01985448  | 1.79742689  |
| H | 2.86280694  | 0.67196448  | -2.22645481 |
| C | -2.56308348 | -1.44930988 | -1.23152402 |
| C | -1.30474020 | -2.04431572 | -1.17763968 |
| C | -0.72722857 | -2.42038704 | 0.04962891  |
| C | -1.57860499 | -2.41520878 | 1.16980294  |
| C | -2.82782173 | -1.79893436 | 1.11814589  |
| C | -3.29779863 | -1.19783856 | -0.06201653 |
| H | -2.91130541 | -1.04350450 | -2.17747576 |
| H | -0.70454071 | -2.06576127 | -2.08251078 |
| H | -1.21928488 | -2.78728965 | 2.12550584  |
| H | -3.38604094 | -1.67558415 | 2.04288064  |
| C | 0.75743902  | -2.40624157 | 0.18946468  |
| C | 1.29853454  | -1.83839494 | 1.35852481  |
| C | 1.64138070  | -2.57731613 | -0.89236132 |
| C | 2.55060557  | -1.23830218 | 1.35288571  |
| H | 0.67300152  | -1.71362365 | 2.23637447  |

|   |             |             |             |
|---|-------------|-------------|-------------|
| C | 2.90231137  | -1.97374560 | -0.89658798 |
| H | 1.30624105  | -3.09333221 | -1.78868274 |
| C | 3.32658975  | -1.18302340 | 0.18402518  |
| H | 2.86281025  | -0.67196731 | 2.22645858  |
| H | 3.50922820  | -2.01985698 | -1.79742359 |
| C | 4.25293322  | -0.00000051 | 0.00000067  |
| C | -4.22516707 | -0.00000812 | 0.00000188  |
| C | -5.57879124 | -0.00000602 | 0.00000026  |
| C | 5.60645515  | -0.00000031 | -0.00000251 |
| C | -6.38497384 | 1.25384748  | 0.14075647  |
| C | -7.41277460 | 1.29949609  | 1.09475387  |
| C | -6.18394321 | 2.40364258  | -0.64369416 |
| C | -8.18908778 | 2.44149603  | 1.29326542  |
| H | -7.60864463 | 0.42168505  | 1.70408209  |
| C | -6.95600096 | 3.54529142  | -0.46815892 |
| H | -5.42154321 | 2.40350482  | -1.41289076 |
| C | -7.96102609 | 3.57737211  | 0.50731249  |
| H | -8.96295146 | 2.43141984  | 2.05253989  |
| H | -6.80000475 | 4.42689840  | -1.08224398 |
| C | -6.38498612 | -1.25385062 | -0.14075706 |
| C | -7.41282063 | -1.29946978 | -1.09472012 |
| C | -6.18393490 | -2.40366790 | 0.64365667  |
| C | -8.18914694 | -2.44146025 | -1.29323427 |
| H | -7.60870702 | -0.42164255 | -1.70401951 |
| C | -6.95600509 | -3.54530765 | 0.46811859  |
| H | -5.42150849 | -2.40355550 | 1.41282682  |
| C | -7.96106440 | -3.57735784 | -0.50731863 |
| H | -8.96303681 | -2.43136000 | -2.05248168 |
| H | -6.79999258 | -4.42693107 | 1.08217594  |
| C | 6.39577937  | 1.24034856  | -0.26351953 |
| C | 7.48778801  | 1.56671881  | 0.55394503  |
| C | 6.09780750  | 2.11585950  | -1.32472925 |
| C | 8.24009428  | 2.72495566  | 0.35372217  |
| H | 7.75422039  | 0.90421351  | 1.37250044  |
| C | 6.84283832  | 3.26632068  | -1.54474903 |
| H | 5.27580378  | 1.88542202  | -1.99332280 |
| C | 7.91762826  | 3.58488490  | -0.70279752 |

|   |              |             |             |
|---|--------------|-------------|-------------|
| H | 9.06780713   | 2.94169074  | 1.01957973  |
| H | 6.61370361   | 3.93435042  | -2.36928275 |
| C | 6.39577964   | -1.24034952 | 0.26351331  |
| C | 7.48778023   | -1.56672618 | -0.55395954 |
| C | 6.09781612   | -2.11585409 | 1.32473071  |
| C | 8.24008623   | -2.72496342 | -0.35373706 |
| H | 7.75420627   | -0.90422580 | -1.37252107 |
| C | 6.84284710   | -3.26631524 | 1.54475016  |
| H | 5.27581898   | -1.88541107 | 1.99333059  |
| C | 7.91762858   | -3.58488605 | 0.70279057  |
| H | 9.06779258   | -2.94170368 | -1.01960109 |
| H | 6.61371901   | -3.93433972 | 2.36928989  |
| O | 8.58504339   | 4.73852895  | -0.99982829 |
| O | 8.58504466   | -4.73852925 | 0.99982167  |
| O | -8.66106250  | -4.74617616 | -0.60482637 |
| O | -8.66101424  | 4.74619694  | 0.60481465  |
| C | 9.67981951   | 5.11013543  | -0.17868288 |
| H | 9.36935043   | 5.26676382  | 0.86298637  |
| H | 10.47976655  | 4.35808809  | -0.20562833 |
| C | 9.67981221   | -5.11014203 | 0.17866778  |
| H | 9.36933291   | -5.26677614 | -0.86299755 |
| H | 10.47976062  | -4.35809568 | 0.20560092  |
| C | -9.68926734  | -4.83201717 | -1.57740391 |
| H | -9.29731882  | -4.69425421 | -2.59400611 |
| H | -10.48180123 | -4.09375360 | -1.39532616 |
| C | -9.68918415  | 4.83206908  | 1.57742622  |
| H | -9.29720066  | 4.69432986  | 2.59401816  |
| H | -10.48172900 | 4.09380564  | 1.39539545  |
| H | 10.05563035  | -6.05002242 | 0.58742815  |
| H | 10.05563485  | 6.05001776  | -0.58744148 |
| H | -10.10578407 | -5.83692518 | -1.48549974 |
| H | -10.10569814 | 5.83697719  | 1.48551100  |

### [3]CTPE

|   |             |             |             |
|---|-------------|-------------|-------------|
| C | -3.92646862 | -1.22616193 | -0.05062045 |
| C | -3.69196535 | -0.42336611 | -1.18007742 |
| C | -4.04596901 | 0.92021051  | -1.18758135 |

|   |             |             |             |
|---|-------------|-------------|-------------|
| C | -4.68579319 | 1.51224143  | -0.08594475 |
| C | -5.02922079 | 0.68270497  | 0.99221051  |
| C | -4.64382503 | -0.65924927 | 1.01472310  |
| C | -3.23654799 | -2.53857467 | 0.05059997  |
| C | -3.17646640 | -3.45112969 | -1.01458000 |
| C | -2.28958518 | -4.52947743 | -0.99195709 |
| C | -1.41141504 | -4.71672018 | 0.08613320  |
| C | -1.53608899 | -3.85373107 | 1.18755670  |
| C | -2.44211529 | -2.80035949 | 1.17997347  |
| H | -3.13789723 | -0.83557954 | -2.01897991 |
| H | -3.76353288 | 1.54058749  | -2.03417227 |
| H | -5.55427520 | 1.10650054  | 1.84416743  |
| H | -4.87236195 | -1.26603289 | 1.88747303  |
| H | -3.80598485 | -3.29551700 | -1.88727630 |
| H | -2.23831149 | -5.20244643 | -1.84377447 |
| H | -0.86477363 | -3.97262154 | 2.03404937  |
| H | -2.46735342 | -2.11004513 | 2.01872394  |
| C | 3.02482161  | -2.78665007 | -0.04910157 |
| C | 2.21252984  | -2.98546921 | -1.17860941 |
| C | 1.22595695  | -3.96382392 | -1.18582979 |
| C | 1.03308210  | -4.81356532 | -0.08393536 |
| C | 1.92297968  | -4.69572592 | 0.99433970  |
| C | 2.89236682  | -3.69089477 | 1.01662246  |
| C | 3.81646906  | -1.53292764 | 0.05160296  |
| C | 4.57717994  | -1.02537298 | -1.01361052 |
| C | 5.06773482  | 0.28182818  | -0.99164429 |
| C | 4.79041328  | 1.13671660  | 0.08576057  |
| C | 4.10485949  | 0.59801993  | 1.18725368  |
| C | 3.64552931  | -0.71326816 | 1.18034356  |
| H | 2.29264466  | -2.29991304 | -2.01781456 |
| H | 0.54757930  | -4.02978216 | -2.03247575 |
| H | 1.81838868  | -5.36202786 | 1.84652340  |
| H | 3.53197448  | -3.58503212 | 1.88943667  |
| H | 4.75745653  | -1.64894331 | -1.88583382 |
| H | 5.62528926  | 0.66209793  | -1.84349056 |
| H | 3.87182499  | 1.23942609  | 2.03320924  |
| H | 3.05995801  | -1.07968333 | 2.01909870  |



|   |             |             |             |
|---|-------------|-------------|-------------|
| C | -0.58044857 | 4.07225805  | 0.04935474  |
| C | -1.20461312 | 3.51513511  | 1.17858533  |
| C | -2.56985489 | 3.25711255  | 1.18582542  |
| C | -3.37937007 | 3.58067636  | 0.08426733  |
| C | -2.77790317 | 4.24755912  | -0.99370550 |
| C | -1.40056616 | 4.47639713  | -1.01604219 |
| C | 0.90112747  | 4.01367464  | -0.05147939 |
| C | 1.75052042  | 4.35206102  | 1.01388844  |
| C | 3.10543051  | 4.01498797  | 0.99181212  |
| C | 3.65239516  | 3.30226365  | -0.08585164 |
| C | 2.82000635  | 3.04353213  | -1.18751641 |
| C | 1.47942629  | 3.40869510  | -1.18050944 |
| H | -0.59435693 | 3.19190782  | 2.01750182  |
| H | -3.00866305 | 2.73515880  | 2.03220478  |
| H | -3.38617094 | 4.53966539  | -1.84564160 |
| H | -0.95085763 | 4.94376092  | -1.88864995 |
| H | 1.33907043  | 4.85373604  | 1.88632322  |
| H | 3.73477529  | 4.25827665  | 1.84378122  |
| H | 3.21625973  | 2.48828769  | -2.03371220 |
| H | 0.84562808  | 3.13449116  | -2.01942297 |
| C | 4.99125921  | 2.62405077  | -0.00009122 |
| C | 6.19296627  | 3.25533899  | -0.00020133 |
| C | -0.22359676 | -5.63416636 | 0.00111486  |
| C | -0.27732500 | -6.99055005 | 0.00077980  |
| C | -4.76788683 | 3.01087121  | -0.00079082 |
| C | -5.91561209 | 3.73571852  | -0.00049327 |
| C | 7.47597815  | 2.52118717  | 0.21541576  |
| C | 8.57528806  | 2.75626075  | -0.62310492 |
| C | 7.64869086  | 1.59973298  | 1.26571934  |
| C | 9.78897042  | 2.08812905  | -0.45428892 |
| H | 8.48079965  | 3.47470022  | -1.43246684 |
| C | 8.85270801  | 0.93578873  | 1.45531666  |
| H | 6.82722039  | 1.40811714  | 1.94769118  |
| C | 9.93260172  | 1.16941290  | 0.59207339  |
| H | 10.60701404 | 2.29345775  | -1.13555549 |
| H | 8.98326932  | 0.23142455  | 2.27108133  |
| C | 6.31696583  | 4.72830892  | -0.21591907 |

|   |              |             |             |
|---|--------------|-------------|-------------|
| C | 7.13574988   | 5.49958272  | 0.62172238  |
| C | 5.65540664   | 5.39393773  | -1.26538714 |
| C | 7.27495117   | 6.87799066  | 0.45286772  |
| H | 7.67434850   | 5.01373884  | 1.43042524  |
| C | 5.79255546   | 6.76202401  | -1.45501765 |
| H | 5.03041380   | 4.82675270  | -1.94675991 |
| C | 6.59918093   | 7.51809140  | -0.59265298 |
| H | 7.90938051   | 7.43459411  | 1.13343836  |
| H | 5.28606252   | 7.26958595  | -2.27018219 |
| C | -5.92182405  | 5.21398978  | 0.21460951  |
| C | -6.67666025  | 6.04779739  | -0.62319578 |
| C | -5.20920528  | 5.82510828  | 1.26379001  |
| C | -6.70551581  | 7.43298176  | -0.45479367 |
| H | -7.25241807  | 5.60615177  | -1.43164352 |
| C | -5.23685303  | 7.19982335  | 1.45299000  |
| H | -4.63135573  | 5.21011919  | 1.94530594  |
| C | -5.98074820  | 8.01750809  | 0.59046634  |
| H | -7.29362150  | 8.03817188  | -1.13549852 |
| H | -4.69143732  | 7.66565406  | 2.26795591  |
| C | -7.25315886  | 3.10595483  | -0.21490420 |
| C | -8.32980591  | 3.42880274  | 0.62382493  |
| C | -7.49935080  | 2.20002989  | -1.26408802 |
| C | -9.59298285  | 2.85940020  | 0.45628581  |
| H | -8.17792489  | 4.13827170  | 1.43235903  |
| C | -8.75258662  | 1.63400845  | -1.45242022 |
| H | -6.69616414  | 1.94274436  | -1.94621384 |
| C | -9.80997505  | 1.95395904  | -0.58898980 |
| H | -10.39168251 | 3.13004436  | 1.13769250  |
| H | -8.93932517  | 0.94141809  | -2.26734116 |
| C | -1.55444659  | -7.73527447 | 0.21514094  |
| C | -1.89886052  | -8.80527632 | -0.62352831 |
| C | -2.44035999  | -7.42436448 | 1.26423012  |
| C | -3.08413352  | -9.52291735 | -0.45605814 |
| H | -1.22823606  | -9.08250889 | -1.43194999 |
| C | -3.61718887  | -8.13574110 | 1.45250213  |
| H | -2.19692340  | -6.61687238 | 1.94635699  |
| C | -3.95310664  | -9.18818601 | 0.58910399  |

|   |              |              |             |
|---|--------------|--------------|-------------|
| H | -3.31396477  | -10.33436457 | -1.13738924 |
| H | -4.29363433  | -7.89682599  | 2.26735749  |
| C | 0.93686891   | -7.83382135  | -0.21425494 |
| C | 1.19561350   | -8.92838427  | 0.62351025  |
| C | 1.84439725   | -7.59326145  | -1.26335190 |
| C | 2.32020236   | -9.73761239  | 0.45509776  |
| H | 0.50530386   | -9.15224726  | 1.43190253  |
| C | 2.96106273   | -8.39556623  | -1.45256807 |
| H | 1.66553444   | -6.76850421  | -1.94480690 |
| C | 3.21267168   | -9.47206151  | -0.59013201 |
| H | 2.48514699   | -10.56525730 | 1.13573830  |
| H | 3.65406963   | -8.21043019  | -2.26749893 |
| O | 4.33789908   | -10.19849318 | -0.85737782 |
| O | -5.13257886  | -9.82319041  | 0.85531092  |
| O | -11.00181297 | 1.34250092   | -0.85524853 |
| O | -5.94089342  | 9.35625969   | 0.85764630  |
| O | 11.07170581  | 0.46505201   | 0.85960373  |
| O | 6.66615672   | 8.85569628   | -0.86016591 |
| C | 7.46579196   | 9.66849052   | -0.01732606 |
| H | 7.37181257   | 10.68504350  | -0.40405332 |
| H | 7.11349417   | 9.64275620   | 1.02251978  |
| H | 8.52135426   | 9.36640672   | -0.04610553 |
| C | 12.19424993  | 0.66041375   | 0.01570771  |
| H | 12.97769356  | 0.00592928   | 0.40253426  |
| H | 11.97212042  | 0.38402723   | -1.02367889 |
| H | 12.54541497  | 1.70071503   | 0.04311814  |
| C | 4.64215596   | -11.29731725 | -0.01449044 |
| H | 5.56980386   | -11.72381564 | -0.40093423 |
| H | 4.79554317   | -10.97936115 | 1.02542805  |
| H | 3.85307901   | -12.06073920 | -0.04357648 |
| C | -5.52289060  | -10.89345187 | 0.01113880  |
| H | -6.48172580  | -11.24517688 | 0.39674714  |
| H | -5.64997395  | -10.56320214 | -1.02849485 |
| H | -4.79708524  | -11.71727834 | 0.03971773  |
| C | -12.10476113 | 1.62797751   | -0.01117783 |
| H | -12.93822684 | 1.03782992   | -0.39696202 |
| H | -11.90498619 | 1.33588314   | 1.02845019  |

|   |              |             |             |
|---|--------------|-------------|-------------|
| H | -12.37157082 | 2.69301157  | -0.03967452 |
| C | -6.67318721  | 10.23002314 | 0.01460522  |
| H | -6.49835964  | 11.23594586 | 0.40103067  |
| H | -6.32415402  | 10.17596388 | -1.02525359 |
| H | -7.74949098  | 10.01315472 | 0.04353106  |

**[4]CTPE**

|   |             |             |             |
|---|-------------|-------------|-------------|
| C | 4.58025504  | 3.27649853  | 0.02143138  |
| C | 3.74429209  | 3.58766980  | 1.10631563  |
| C | 2.96586180  | 4.73986628  | 1.10075637  |
| C | 3.02767618  | 5.65444481  | 0.03614370  |
| C | 3.90264613  | 5.37058339  | -1.02308397 |
| C | 4.65238194  | 4.19404141  | -1.03764991 |
| C | 5.27766703  | 1.96474232  | -0.02338651 |
| C | 6.07884369  | 1.51146887  | 1.03559419  |
| C | 6.63489113  | 0.23196944  | 1.02099535  |
| C | 6.38080943  | -0.65221312 | -0.03816122 |
| C | 5.58783637  | -0.19205493 | -1.10263638 |
| C | 5.06796488  | 1.09762532  | -1.10816158 |
| H | 3.66323611  | 2.88614320  | 1.93245972  |
| H | 2.27973139  | 4.92723650  | 1.92268711  |
| H | 3.97852497  | 6.06938750  | -1.85160560 |
| H | 5.30427467  | 3.98286265  | -1.88160085 |
| H | 6.26850806  | 2.17004271  | 1.87946942  |
| H | 7.25678701  | -0.09591300 | 1.84940508  |
| H | 5.35927085  | -0.86563579 | -1.92452999 |
| H | 4.44089600  | 1.42264529  | -1.93421886 |
| C | 3.27652860  | -4.58023397 | 0.02157352  |
| C | 3.58772032  | -3.74427838 | 1.10645725  |
| C | 4.73992385  | -2.96585849 | 1.10088728  |
| C | 5.65448793  | -3.02767604 | 0.03626240  |
| C | 5.37060794  | -3.90264217 | -1.02296362 |
| C | 4.19405877  | -4.65236717 | -1.03751836 |
| C | 1.96476512  | -5.27763348 | -0.02323444 |
| C | 1.51150066  | -6.07882617 | 1.03573857  |
| C | 0.23199871  | -6.63486562 | 1.02114647  |
| C | -0.65219872 | -6.38075825 | -0.03799345 |

|   |             |             |             |
|---|-------------|-------------|-------------|
| C | -0.19204979 | -5.58776688 | -1.10245979 |
| C | 1.09763397  | -5.06790345 | -1.10799238 |
| H | 2.88620471  | -3.66321992 | 1.93261051  |
| H | 4.92731021  | -2.27973284 | 1.92281832  |
| H | 6.06940243  | -3.97852485 | -1.85149312 |
| H | 3.98286390  | -5.30425552 | -1.88146862 |
| H | 2.17008434  | -6.26850817 | 1.87960219  |
| H | -0.09587877 | -7.25677272 | 1.84954979  |
| H | -0.86564049 | -5.35918126 | -1.92433949 |
| H | 1.42264611  | -4.44082008 | -1.93404173 |
| C | -5.27766438 | -1.96475663 | -0.02332721 |
| C | -6.07885295 | -1.51144217 | 1.03562686  |
| C | -6.63489727 | -0.23194207 | 1.02097349  |
| C | -6.38079990 | 0.65220074  | -0.03821269 |
| C | -5.58781541 | 0.19200100  | -1.10266146 |
| C | -5.06794706 | -1.09768084 | -1.10813222 |
| C | -4.58025348 | -3.27651186 | 0.02154844  |
| C | -3.74429326 | -3.58763556 | 1.10644859  |
| C | -2.96586096 | -4.73983069 | 1.10093990  |
| C | -3.02767162 | -5.65445528 | 0.03636647  |
| C | -3.90263864 | -5.37064022 | -1.02287561 |
| C | -4.65237632 | -4.19409979 | -1.03749368 |
| H | -6.26852844 | -2.16998414 | 1.87952443  |
| H | -7.25680214 | 0.09597317  | 1.84936352  |
| H | -5.35923841 | 0.86555084  | -1.92457724 |
| H | -4.44086917 | -1.42273354 | -1.93416979 |
| H | -3.66324142 | -2.88607379 | 1.93256318  |
| H | -2.27973219 | -4.92716501 | 1.92288025  |
| H | -3.97851475 | -6.06947942 | -1.85136784 |
| H | -5.30426647 | -3.98295774 | -1.88145580 |
| C | -3.27651601 | 4.58022408  | 0.02137436  |
| C | -3.58770644 | 3.74430385  | 1.10628582  |
| C | -4.73991001 | 2.96588381  | 1.10074318  |
| C | -5.65447613 | 3.02766627  | 0.03611802  |
| C | -5.37059651 | 3.90259638  | -1.02313798 |
| C | -4.19404781 | 4.65232107  | -1.03771894 |
| C | -1.96475444 | 5.27762432  | -0.02345712 |

|   |             |             |             |
|---|-------------|-------------|-------------|
| C | -1.51148185 | 6.07883189  | 1.03550117  |
| C | -0.23198058 | 6.63487324  | 1.02089083  |
| C | 0.65220688  | 6.38075444  | -0.03825383 |
| C | 0.19205004  | 5.58774916  | -1.10270591 |
| C | -1.09763255 | 5.06788300  | -1.10822053 |
| H | -2.88618944 | 3.66327132  | 1.93244042  |
| H | -4.92729474 | 2.27978518  | 1.92269715  |
| H | -6.06939179 | 3.97845132  | -1.85166935 |
| H | -3.98285474 | 5.30418180  | -1.88169098 |
| H | -2.17005878 | 6.26852532  | 1.87936746  |
| H | 0.09590174  | 7.25679277  | 1.84928285  |
| H | 0.86563374  | 5.35915469  | -1.92458905 |
| H | -1.42265059 | 4.44078851  | -1.93425913 |
| C | -6.81964987 | 2.08512967  | -0.00093657 |
| C | -8.12061558 | 2.48285283  | -0.00054157 |
| C | 2.08513049  | 6.81961130  | -0.00093051 |
| C | 2.48284749  | 8.12057970  | -0.00052042 |
| C | 8.12062727  | -2.48286169 | -0.00040981 |
| C | 6.81966130  | -2.08514038 | -0.00082665 |
| C | -2.48283457 | -8.12058827 | -0.00019582 |
| C | -2.08511872 | -6.81961865 | -0.00065565 |
| C | 1.52332660  | 9.24933393  | -0.19462944 |
| C | 1.56016510  | 10.36595211 | 0.65296581  |
| C | 0.58196543  | 9.26252388  | -1.24158972 |
| C | 0.68352113  | 11.44080255 | 0.49688569  |
| H | 2.28769064  | 10.39589899 | 1.45921479  |
| C | -0.28822846 | 10.32892923 | -1.41909246 |
| H | 0.53802935  | 8.42447037  | -1.92913712 |
| C | -0.24970652 | 11.42572756 | -0.54628730 |
| H | 0.74083375  | 12.27662420 | 1.18507677  |
| H | -1.00781442 | 10.33753386 | -2.23197849 |
| C | 3.90938983  | 8.51990098  | 0.19426475  |
| C | 4.50317687  | 9.46727298  | -0.65222691 |
| C | 4.69701437  | 8.00377811  | 1.24101920  |
| C | 5.83077645  | 9.86854613  | -0.49530309 |
| H | 3.91686342  | 9.89952756  | -1.45822192 |
| C | 6.01455543  | 8.40159848  | 1.41933434  |

|   |             |              |             |
|---|-------------|--------------|-------------|
| H | 4.26483104  | 7.28374128   | 1.92785782  |
| C | 6.59588383  | 9.33348211   | 0.54762677  |
| H | 6.25057647  | 10.59441476  | -1.18260472 |
| H | 6.61577391  | 8.00583169   | 2.23208498  |
| C | 8.51996263  | -3.90939311  | 0.19438673  |
| C | 9.46743269  | -4.50313847  | -0.65202671 |
| C | 8.00375387  | -4.69706105  | 1.24106790  |
| C | 9.86872272  | -5.83073190  | -0.49509749 |
| H | 9.89975251  | -3.91679595  | -1.45796507 |
| C | 8.40158843  | -6.01459644  | 1.41938740  |
| H | 7.28363963  | -4.26491591  | 1.92784907  |
| C | 9.33357402  | -6.59588045  | 0.54775858  |
| H | 10.59467046 | -6.25049466  | -1.18233837 |
| H | 8.00575459  | -6.61584482  | 2.23208330  |
| C | 9.24937621  | -1.52332297  | -0.19450619 |
| C | 10.36593084 | -1.56007107  | 0.65317433  |
| C | 9.26261823  | -0.58204631  | -1.24153938 |
| C | 11.44077090 | -0.68341190  | 0.49710598  |
| H | 10.39583554 | -2.28753657  | 1.45947950  |
| C | 10.32901575 | 0.28816119   | -1.41903149 |
| H | 8.42461214  | -0.53818550  | -1.92914959 |
| C | 11.42574888 | 0.24973404   | -0.54614129 |
| H | 12.27654345 | -0.74064846  | 1.18536292  |
| H | 10.33766346 | 1.00768480   | -2.23197219 |
| C | -1.52333693 | -9.24935996  | -0.19427439 |
| C | -1.56026305 | -10.36600318 | 0.65328641  |
| C | -0.58190086 | -9.26254976  | -1.24116983 |
| C | -0.68363978 | -11.44087457 | 0.49723600  |
| H | -2.28784182 | -10.39595297 | 1.45948677  |
| C | 0.28827372  | -10.32897432 | -1.41864209 |
| H | -0.53789252 | -8.42448095  | -1.92869361 |
| C | 0.24966073  | -11.42579767 | -0.54587128 |
| H | -0.74102628 | -12.27671400 | 1.18539935  |
| H | 1.00791461  | -10.33757609 | -2.23147958 |
| C | -3.90938800 | -8.51988066  | 0.19460537  |
| C | -4.50322617 | -9.46719102  | -0.65191709 |
| C | -4.69696090 | -8.00378991  | 1.24141274  |

|   |              |              |             |
|---|--------------|--------------|-------------|
| C | -5.83083308  | -9.86843316  | -0.49497249 |
| H | -3.91694846  | -9.89942098  | -1.45795174 |
| C | -6.01450875  | -8.40158086  | 1.41974938  |
| H | -4.26473188  | -7.28380013  | 1.92827232  |
| C | -6.59589098  | -9.33340088  | 0.54801023  |
| H | -6.25067797  | -10.59425246 | -1.18229868 |
| H | -6.61569094  | -8.00583957  | 2.23253920  |
| C | -9.24936779  | 1.52331577   | -0.19461140 |
| C | -10.36594809 | 1.56012960   | 0.65303346  |
| C | -9.26258934  | 0.58197046   | -1.24158380 |
| C | -11.44079307 | 0.68347240   | 0.49698928  |
| H | -10.39586915 | 2.28764621   | 1.45929174  |
| C | -10.32899088 | -0.28823654  | -1.41905152 |
| H | -8.42456398  | 0.53805562   | -1.92916700 |
| C | -11.42575031 | -0.24974108  | -0.54619718 |
| H | -12.27658536 | 0.74076288   | 1.18521782  |
| H | -10.33762160 | -1.00781225  | -2.23194631 |
| C | -8.51994305  | 3.90939639   | 0.19419650  |
| C | -9.46737443  | 4.50312724   | -0.65226949 |
| C | -8.00376562  | 4.69708685   | 1.24087566  |
| C | -9.86865525  | 5.83072994   | -0.49539328 |
| H | -9.89967070  | 3.91676592   | -1.45820698 |
| C | -8.40159187  | 6.01463205   | 1.41914281  |
| H | -7.28368207  | 4.26495195   | 1.92769553  |
| C | -9.33353698  | 6.59590172   | 0.54746129  |
| H | -10.59457282 | 6.25048164   | -1.18267275 |
| H | -8.00578242  | 6.61589943   | 2.23183652  |
| O | -1.14865847  | 12.42174143  | -0.80204747 |
| O | 7.89787609   | 9.65683671   | 0.80415567  |
| O | 12.42176037  | 1.14869118   | -0.80189702 |
| O | 9.65693466   | -7.89787064  | 0.80428595  |
| O | 1.14860121   | -12.42182917 | -0.80159845 |
| O | -7.89788551  | -9.65673040  | 0.80456270  |
| O | -9.65689259  | 7.89790329   | 0.80393924  |
| O | -12.42176371 | -1.14870375  | -0.80192510 |
| C | -8.53697282  | -10.59087604 | -0.04932888 |
| H | -9.55569866  | -10.69499352 | 0.32904269  |



|   |              |              |             |
|---|--------------|--------------|-------------|
| H | -8.57105543  | -10.23316021 | -1.08708739 |
| H | -8.03946064  | -11.56972880 | -0.02344596 |
| C | 1.15691666   | -13.55269492 | 0.05354868  |
| H | 1.94356254   | -14.20862303 | -0.32427752 |
| H | 1.38527129   | -13.27390794 | 1.09094759  |
| H | 0.19741247   | -14.08661206 | 0.02848431  |
| C | -13.55257019 | -1.15713116  | 0.05329826  |
| H | -14.20849671 | -1.94376805  | -0.32454969 |
| H | -13.27370516 | -1.38556395  | 1.09065913  |
| H | -14.08652358 | -0.19764396  | 0.02835173  |
| C | -10.59115444 | 8.53688074   | -0.04990827 |
| H | -10.69526366 | 9.55563818   | 0.32838049  |
| H | -10.23355440 | 8.57087895   | -1.08770932 |
| H | -11.56998736 | 8.03933776   | -0.02387060 |
| C | -1.15706002  | 13.55258548  | 0.05312690  |
| H | -1.94369440  | 14.20850492  | -0.32473839 |
| H | -1.38548127  | 13.27376802  | 1.09050306  |
| H | -0.19756658  | 14.08652580  | 0.02814330  |
| C | 8.53690953   | 10.59104459  | -0.04970869 |
| H | 9.55564506   | 10.69517026  | 0.32863445  |
| H | 8.57096717   | 10.23338358  | -1.08748685 |
| H | 8.03937105   | 11.56988211  | -0.02375803 |
| C | 10.59124514  | -8.53685836  | -0.04950090 |
| H | 10.69535817  | -9.55560108  | 0.32882626  |
| H | 10.23368955  | -8.57089768  | -1.08731594 |
| H | 11.57006716  | -8.03929548  | -0.02343818 |
| C | 13.55254003  | 1.15718748   | 0.05336105  |
| H | 14.20846872  | 1.94380808   | -0.32451706 |
| H | 13.27363991  | 1.38568377   | 1.09069853  |
| H | 14.08650596  | 0.19770520   | 0.02849307  |

#### **TPE-1**

|   |            |            |             |
|---|------------|------------|-------------|
| C | 3.30116904 | 2.69505230 | 1.36118894  |
| C | 2.15846911 | 1.91357023 | 1.19780821  |
| C | 1.24813821 | 2.17169924 | 0.15844998  |
| C | 1.51304727 | 3.25487968 | -0.69854402 |
| C | 2.66114751 | 4.03007791 | -0.54265011 |

|   |             |             |             |
|---|-------------|-------------|-------------|
| H | 3.98796496  | 2.47859482  | 2.17553837  |
| H | 1.96243903  | 1.09284269  | 1.88076267  |
| H | 0.81119697  | 3.48442541  | -1.49549671 |
| H | 2.85057748  | 4.85437293  | -1.22561451 |
| C | -3.56118246 | 3.75370838  | -0.48862824 |
| C | -2.66114965 | 4.03007649  | 0.54264950  |
| C | -1.51304857 | 3.25487939  | 0.69854228  |
| C | -1.24814016 | 2.17169803  | -0.15845080 |
| C | -2.15847264 | 1.91356736  | -1.19780730 |
| C | -3.30117323 | 2.69504854  | -1.36118712 |
| H | -2.85057911 | 4.85437207  | 1.22561339  |
| H | -0.81119746 | 3.48442638  | 1.49549383  |
| H | -1.96244309 | 1.09283961  | -1.88076160 |
| H | -3.98797013 | 2.47858999  | -2.17553547 |
| C | 0.00000043  | -0.00435570 | -0.00000059 |
| C | -0.00000062 | 1.36386877  | -0.00000062 |
| C | 1.25240162  | -0.80759579 | -0.12514394 |
| C | 1.48893353  | -1.90926670 | 0.70992884  |
| C | 2.21452987  | -0.52869275 | -1.11576939 |
| C | 2.64295347  | -2.68674914 | 0.59765180  |
| H | 0.75779425  | -2.16405861 | 1.47193672  |
| C | 3.36032919  | -1.29886835 | -1.24979279 |
| H | 2.05381498  | 0.30515064  | -1.79166626 |
| C | 3.58848951  | -2.38240752 | -0.38850841 |
| H | 2.78872508  | -3.52083280 | 1.27483017  |
| H | 4.09515087  | -1.08420438 | -2.01961590 |
| C | -1.25240022 | -0.80759672 | 0.12514290  |
| C | -1.48893260 | -1.90926695 | -0.70993063 |
| C | -2.21452745 | -0.52869461 | 1.11576953  |
| C | -2.64295205 | -2.68675003 | -0.59765273 |
| H | -0.75779379 | -2.16405822 | -1.47193921 |
| C | -3.36032644 | -1.29887071 | 1.24979357  |
| H | -2.05381206 | 0.30514872  | 1.79166646  |
| C | -3.58848721 | -2.38240940 | 0.38850871  |
| H | -2.78872394 | -3.52083341 | -1.27483133 |
| H | -4.09514746 | -1.08420747 | 2.01961752  |
| O | 4.74625959  | -3.07545030 | -0.59839565 |

|   |             |             |             |
|---|-------------|-------------|-------------|
| O | -4.74625679 | -3.07545280 | 0.59839678  |
| C | 5.02693560  | -4.18217112 | 0.24247715  |
| H | 5.98594863  | -4.57968900 | -0.09516305 |
| H | 5.11066521  | -3.87976169 | 1.29490653  |
| H | 4.25973945  | -4.96300113 | 0.15350838  |
| C | -5.02693340 | -4.18217338 | -0.24247612 |
| H | -5.98594594 | -4.57969169 | 0.09516505  |
| H | -5.11066431 | -3.87976357 | -1.29490527 |
| H | -4.25973689 | -4.96300317 | -0.15350849 |
| H | -4.45297323 | 4.36187489  | -0.61529982 |
| C | 3.56117882  | 3.75371142  | 0.48862940  |
| H | 4.45296915  | 4.36187845  | 0.61530151  |

## [2]OTPE-1

|   |             |             |             |
|---|-------------|-------------|-------------|
| C | -7.07000887 | -3.29316121 | 2.60756063  |
| C | -6.63806757 | -2.09943856 | 2.03166437  |
| C | -5.65023769 | -2.09464936 | 1.03186068  |
| C | -5.09521777 | -3.32745900 | 0.64472080  |
| C | -5.53419272 | -4.52265460 | 1.21238635  |
| H | -7.83206930 | -3.27084645 | 3.38246256  |
| H | -7.06616688 | -1.15619386 | 2.35651416  |
| H | -4.31562232 | -3.34386471 | -0.11184793 |
| H | -5.09873405 | -5.46431248 | 0.88771558  |
| C | -0.82126890 | -0.50826535 | 0.33682754  |
| C | -1.50032237 | -0.91242145 | 1.49957849  |
| C | -2.88780563 | -1.00741784 | 1.52883326  |
| C | -3.66656630 | -0.68138415 | 0.40415553  |
| C | -2.98682383 | -0.28734007 | -0.76130943 |
| C | -1.59890148 | -0.20322668 | -0.79393582 |
| H | -0.93086980 | -1.18636285 | 2.38345524  |
| H | -3.38054680 | -1.34408332 | 2.43665219  |
| H | -3.55863530 | -0.03838870 | -1.64976395 |
| H | -1.10976730 | 0.12582428  | -1.70657065 |
| C | -5.99571481 | 0.15325096  | -0.03758789 |
| C | -5.15327465 | -0.81566552 | 0.43713674  |
| C | -7.45036195 | -0.09037781 | -0.26807482 |
| C | -8.41302189 | 0.83820986  | 0.15414159  |

|   |              |             |             |
|---|--------------|-------------|-------------|
| C | -7.90941972  | -1.22700005 | -0.96265756 |
| C | -9.77698990  | 0.64084912  | -0.06818428 |
| H | -8.09182929  | 1.73533867  | 0.67579802  |
| C | -9.25987101  | -1.43221417 | -1.20352407 |
| H | -7.18994012  | -1.95640924 | -1.32074494 |
| C | -10.20785792 | -0.50206676 | -0.75175539 |
| H | -10.48522909 | 1.38010542  | 0.28876095  |
| H | -9.60777960  | -2.30611728 | -1.74567177 |
| C | -5.52940403  | 1.53373090  | -0.36216906 |
| C | -5.92252642  | 2.16756712  | -1.54994328 |
| C | -4.72685226  | 2.27212280  | 0.52988609  |
| C | -5.51470984  | 3.46512230  | -1.86447004 |
| H | -6.55748732  | 1.63351535  | -2.25118702 |
| C | -4.32353244  | 3.56695693  | 0.23910032  |
| H | -4.42078426  | 1.81890648  | 1.46740612  |
| C | -4.70874093  | 4.17356670  | -0.96575389 |
| H | -5.83274415  | 3.90886012  | -2.80119304 |
| H | -3.71102133  | 4.13427687  | 0.93309798  |
| O | -11.51109073 | -0.79602304 | -1.03451724 |
| O | -4.25770402  | 5.44763488  | -1.16086417 |
| C | -12.51184603 | 0.11094793  | -0.60257877 |
| H | -13.46307171 | -0.31540627 | -0.92680103 |
| H | -12.51670287 | 0.21769668  | 0.49042484  |
| H | -12.38466727 | 1.10165345  | -1.05923662 |
| C | -4.61707439  | 6.10937595  | -2.36237393 |
| H | -4.15384685  | 7.09656182  | -2.31111349 |
| H | -4.23924279  | 5.57755191  | -3.24580195 |
| H | -5.70569097  | 6.22443855  | -2.45120397 |
| C | -6.52423842  | -4.51110195 | 2.19709606  |
| H | -6.86221324  | -5.44178069 | 2.64522019  |
| C | 0.65776080   | -0.41630148 | 0.30335736  |
| C | 1.38710338   | 0.01084090  | 1.42705826  |
| C | 1.38489297   | -0.74465150 | -0.85391498 |
| C | 2.77433664   | 0.10572568  | 1.39348869  |
| H | 0.85673159   | 0.30239932  | 2.32943623  |
| C | 2.77312746   | -0.66108072 | -0.88357215 |
| H | 0.85650016   | -1.09230082 | -1.73728228 |

|   |             |             |             |
|---|-------------|-------------|-------------|
| C | 3.50297175  | -0.24430624 | 0.24271732  |
| H | 3.30688167  | 0.45977081  | 2.27168655  |
| H | 3.30531474  | -0.92861017 | -1.79106129 |
| C | 4.99040453  | -0.11419668 | 0.20853609  |
| C | 5.80358849  | -1.10224673 | -0.27750831 |
| C | 5.51833941  | 1.17518287  | 0.74510275  |
| C | 6.58046657  | 1.21133911  | 1.67026309  |
| C | 4.93298906  | 2.39883648  | 0.38900057  |
| C | 7.04317741  | 2.40885105  | 2.19497298  |
| H | 7.04416592  | 0.28078486  | 1.98177739  |
| C | 5.39423295  | 3.61426012  | 0.89825600  |
| H | 4.09887657  | 2.40604842  | -0.30703453 |
| C | 6.45741270  | 3.62365288  | 1.80826324  |
| H | 7.85690930  | 2.43087241  | 2.91334899  |
| H | 4.91714423  | 4.53594458  | 0.58469660  |
| C | 5.30945034  | -2.48859873 | -0.54161298 |
| C | 5.61269251  | -3.13881664 | -1.75130536 |
| C | 4.58138467  | -3.20054623 | 0.42699271  |
| C | 5.17497596  | -4.43926336 | -1.99671568 |
| H | 6.19233829  | -2.61273994 | -2.50468825 |
| C | 4.15313852  | -4.50543144 | 0.18711924  |
| H | 4.35346851  | -2.72240345 | 1.37459518  |
| C | 4.44283650  | -5.12918306 | -1.02790968 |
| H | 5.40958359  | -4.91611615 | -2.94509596 |
| H | 3.59482204  | -5.03698486 | 0.95349729  |
| H | 4.10719947  | -6.14570910 | -1.21566269 |
| C | 7.24833319  | -0.88436608 | -0.58189136 |
| C | 8.21780491  | -1.81744481 | -0.18608928 |
| C | 7.68841694  | 0.22921455  | -1.32486535 |
| C | 9.57166177  | -1.64660062 | -0.48125876 |
| H | 7.91099360  | -2.69799461 | 0.37133622  |
| C | 9.02776678  | 0.40795058  | -1.63718616 |
| H | 6.96218953  | 0.96125176  | -1.66341527 |
| C | 9.98399912  | -0.52648706 | -1.21191821 |
| H | 10.28597268 | -2.38906139 | -0.14364094 |
| H | 9.36066531  | 1.26379917  | -2.21633781 |
| O | 6.98593758  | 4.74647345  | 2.37804065  |

|   |             |             |             |
|---|-------------|-------------|-------------|
| O | 11.27536935 | -0.25904948 | -1.56641041 |
| C | 6.42834632  | 6.00210399  | 2.02683342  |
| H | 6.99344698  | 6.74866043  | 2.58813371  |
| H | 6.53023627  | 6.20361686  | 0.95208384  |
| H | 5.36785003  | 6.06600310  | 2.30498340  |
| C | 12.28324050 | -1.17213067 | -1.16488514 |
| H | 13.22300336 | -0.76823891 | -1.54628017 |
| H | 12.34194986 | -1.25474603 | -0.07136005 |
| H | 12.11830728 | -2.17046957 | -1.59182946 |

**[2]CHPE**

|   |             |             |             |
|---|-------------|-------------|-------------|
| C | -5.76065428 | -3.01443142 | -1.03758973 |
| C | -6.82196312 | -2.10730886 | -0.99522810 |
| C | -6.95266466 | -1.19862119 | 0.06591145  |
| C | -6.04848394 | -1.31184021 | 1.13439352  |
| C | -5.00799706 | -2.23125792 | 1.10571278  |
| C | -4.80314400 | -3.06011820 | -0.01128615 |
| H | -5.65596508 | -3.67164999 | -1.89738601 |
| H | -7.52711324 | -2.06752164 | -1.82128464 |
| H | -6.12213960 | -0.62049376 | 1.96954894  |
| H | -4.28357550 | -2.23995854 | 1.91512800  |
| C | -3.50331717 | -3.76736737 | -0.13749500 |
| C | -2.86510187 | -4.36296273 | 0.96463457  |
| C | -2.76656906 | -3.66313449 | -1.32880303 |
| C | -1.51832421 | -4.71076035 | 0.91669298  |
| H | -3.42299865 | -4.51985051 | 1.88424871  |
| C | -1.41679270 | -3.99747621 | -1.37174116 |
| H | -3.22683604 | -3.20676208 | -2.20082868 |
| C | -0.74092286 | -4.46416505 | -0.23009205 |
| H | -1.05366845 | -5.14197997 | 1.79917178  |
| H | -0.85652001 | -3.78732051 | -2.27782152 |
| C | 0.74396189  | -4.47215511 | -0.19784317 |
| C | 1.52245814  | -4.61376159 | -1.36155748 |
| C | 1.42093041  | -4.12366043 | 0.98460770  |
| C | 2.87267226  | -4.27546627 | -1.37305533 |
| H | 1.05651262  | -4.95347584 | -2.28253620 |
| C | 2.77318568  | -3.79844599 | 0.97657999  |

|   |             |             |             |
|---|-------------|-------------|-------------|
| H | 0.86025224  | -3.99632573 | 1.90566366  |
| C | 3.51306957  | -3.79382422 | -0.21759397 |
| H | 3.43134259  | -4.34864558 | -2.30262054 |
| H | 3.23365373  | -3.43115268 | 1.88950300  |
| C | 4.81658966  | -3.08432088 | -0.26883100 |
| C | 5.75384006  | -3.12087125 | 0.77697787  |
| C | 5.04043402  | -2.16517208 | -1.30953440 |
| C | 6.80575648  | -2.20423131 | 0.83676884  |
| H | 5.63595472  | -3.84794203 | 1.57668124  |
| C | 6.06987011  | -1.23638047 | -1.23527932 |
| H | 4.33380466  | -2.11020190 | -2.13273550 |
| C | 6.94528587  | -1.20231769 | -0.13661859 |
| H | 7.49053476  | -2.22588613 | 1.68028010  |
| H | 6.15267048  | -0.47185735 | -2.00324905 |
| C | -5.32677746 | 2.27337924  | -1.71116817 |
| C | -6.38450499 | 1.39254754  | -1.52803359 |
| C | -6.98285549 | 1.22059732  | -0.26920259 |
| C | -6.54393101 | 2.05066625  | 0.77217579  |
| C | -5.45470479 | 2.90627808  | 0.59816165  |
| C | -4.77671601 | 2.98803177  | -0.63034291 |
| H | -4.88704869 | 2.36616253  | -2.69962050 |
| H | -6.72076919 | 0.78488655  | -2.36448035 |
| H | -7.00622486 | 1.96756896  | 1.75231083  |
| H | -5.07444375 | 3.44833214  | 1.45943294  |
| C | -3.43617514 | 3.61944811  | -0.73921333 |
| C | -2.97233149 | 4.61916251  | 0.13595951  |
| C | -2.50353558 | 3.08851469  | -1.64826299 |
| C | -1.62661446 | 4.98355971  | 0.17497626  |
| H | -3.66674349 | 5.10228064  | 0.81817868  |
| C | -1.16743545 | 3.45964943  | -1.61902361 |
| H | -2.80325848 | 2.29626388  | -2.32597176 |
| C | -0.68149835 | 4.37522621  | -0.66980208 |
| H | -1.30229429 | 5.73529303  | 0.89027838  |
| H | -0.46818168 | 2.94987259  | -2.27459418 |
| C | 0.78739543  | 4.47989410  | -0.48479224 |
| C | 1.67282641  | 4.33964775  | -1.56819530 |
| C | 1.34559032  | 4.47748102  | 0.80542348  |

|   |              |             |             |
|---|--------------|-------------|-------------|
| C | 3.01488912   | 4.03415722  | -1.36698597 |
| H | 1.28981630   | 4.39869078  | -2.58340073 |
| C | 2.68997649   | 4.17835496  | 1.00635741  |
| H | 0.69858549   | 4.60950892  | 1.66840530  |
| C | 3.53503343   | 3.86125575  | -0.07214653 |
| H | 3.64355405   | 3.82529639  | -2.22810311 |
| H | 3.07201849   | 4.11834126  | 2.02185736  |
| C | 4.81475514   | 3.13429036  | 0.12545556  |
| C | 4.87667453   | 2.15497882  | 1.13366527  |
| C | 5.89766091   | 3.20944027  | -0.76741922 |
| C | 5.89922283   | 1.21802974  | 1.16317862  |
| H | 4.05623420   | 2.06081702  | 1.83854075  |
| C | 6.93691714   | 2.27744348  | -0.72540826 |
| H | 5.90954518   | 3.98046727  | -1.53378193 |
| C | 6.92634328   | 1.22478923  | 0.20406017  |
| H | 5.86197944   | 0.41622204  | 1.89534623  |
| H | 7.73696223   | 2.33246937  | -1.45857477 |
| C | 7.80361078   | 0.01281460  | 0.07583360  |
| C | -7.84421275  | 0.01236173  | -0.01467115 |
| C | -9.19282997  | 0.01222570  | 0.12321715  |
| C | 9.16103679   | 0.01195416  | 0.14746586  |
| C | -9.95732752  | -1.22551823 | 0.46573767  |
| C | -9.58142144  | -2.07919119 | 1.51983449  |
| C | -11.11237615 | -1.56117921 | -0.25530777 |
| C | -10.31343466 | -3.21874365 | 1.82402239  |
| H | -8.70671060  | -1.84032109 | 2.11488239  |
| C | -11.85248863 | -2.70971523 | 0.02882402  |
| H | -11.44030713 | -0.91299349 | -1.06308618 |
| C | -11.45262982 | -3.54818994 | 1.07614364  |
| H | -10.02383902 | -3.87017568 | 2.64280088  |
| H | -12.73159201 | -2.93486196 | -0.56440230 |
| C | -10.01111829 | 1.25083391  | -0.04854943 |
| C | -9.86427303  | 2.10996158  | -1.15361186 |
| C | -10.98773432 | 1.58394259  | 0.90140944  |
| C | -10.64145068 | 3.25214879  | -1.29078498 |
| H | -9.13678639  | 1.87324535  | -1.92209112 |
| C | -11.76855001 | 2.73466139  | 0.78561964  |



|   |              |             |             |
|---|--------------|-------------|-------------|
| H | -11.13901038 | 0.93213520  | 1.75719847  |
| C | -11.59662138 | 3.57865605  | -0.31802519 |
| H | -10.52952450 | 3.90756347  | -2.14899329 |
| H | -12.50230131 | 2.95733840  | 1.55207390  |
| C | 9.96838415   | -1.20874090 | -0.14613062 |
| C | 9.73621711   | -2.00510111 | -1.28416646 |
| C | 11.01841909  | -1.58836916 | 0.70288381  |
| C | 10.50269956  | -3.13133517 | -1.54808471 |
| H | 8.94687436   | -1.72938650 | -1.97544405 |
| C | 11.79094003  | -2.72481992 | 0.45887922  |
| H | 11.23511294  | -0.98600100 | 1.58051769  |
| C | 11.53385852  | -3.50553262 | -0.67435471 |
| H | 10.32492950  | -3.73770050 | -2.43088920 |
| H | 12.58394452  | -2.98598221 | 1.15054210  |
| C | 9.93539323   | 1.22971724  | 0.52938435  |
| C | 9.58537519   | 2.02111235  | 1.64045748  |
| C | 11.07098613  | 1.60967512  | -0.20083690 |
| C | 10.32284676  | 3.14305955  | 1.99082431  |
| H | 8.72523588   | 1.74492285  | 2.24132992  |
| C | 11.81664756  | 2.74209620  | 0.13043642  |
| H | 11.37835418  | 1.01060545  | -1.05331906 |
| C | 11.44267350  | 3.51776019  | 1.23415114  |
| H | 10.05380659  | 3.74566330  | 2.85285583  |
| H | 12.67981112  | 3.00376158  | -0.47116479 |
| O | 12.09876995  | 4.63769043  | 1.65753110  |
| O | 12.22700822  | -4.63006013 | -1.01928689 |
| O | -12.10081606 | -4.69009251 | 1.45087130  |
| O | -12.30693664 | 4.72323945  | -0.54155814 |
| C | -13.25902769 | -5.07210257 | 0.72728976  |
| H | -13.03265418 | -5.25426697 | -0.33175416 |
| H | -13.60646393 | -5.99985457 | 1.18582909  |
| H | -14.05025832 | -4.31390301 | 0.79999777  |
| C | -13.28646526 | 5.10148860  | 0.41154313  |
| H | -12.84223075 | 5.27733826  | 1.40035076  |
| H | -13.72094587 | 6.03210009  | 0.04155938  |
| H | -14.07656489 | 4.34408677  | 0.50251902  |
| C | 13.23900214  | 5.06295129  | 0.92939370  |

|   |             |             |             |
|---|-------------|-------------|-------------|
| H | 12.98686288 | 5.30582209  | -0.11147902 |
| H | 13.59719200 | 5.96313199  | 1.43241554  |
| H | 14.03184650 | 4.30304683  | 0.93884702  |
| C | 13.27999173 | -5.05589666 | -0.17014407 |
| H | 12.91577946 | -5.29170829 | 0.83867014  |
| H | 13.68607425 | -5.96043568 | -0.62683778 |
| H | 14.07285192 | -4.29938404 | -0.09796346 |

### [3]CHPE

|   |             |             |             |
|---|-------------|-------------|-------------|
| C | -8.73848346 | -4.22257241 | 0.37416224  |
| C | -8.47798077 | -5.58997239 | 0.42186060  |
| C | -7.52347101 | -6.18072576 | -0.42398203 |
| C | -6.89767367 | -5.34726620 | -1.36773014 |
| C | -7.15765745 | -3.98361541 | -1.41586500 |
| C | -8.05398211 | -3.37676947 | -0.51708329 |
| H | -9.47031787 | -3.80356879 | 1.05925490  |
| H | -8.99528911 | -6.20667365 | 1.15053045  |
| H | -6.15291448 | -5.76856966 | -2.03683511 |
| H | -6.59742797 | -3.36922185 | -2.11403722 |
| C | -8.14748058 | -1.89819863 | -0.44243209 |
| C | -7.86784401 | -1.08241061 | -1.55318739 |
| C | -8.38969702 | -1.24728384 | 0.78061627  |
| C | -7.73143852 | 0.29516781  | -1.42511003 |
| H | -7.72147692 | -1.53498251 | -2.52960604 |
| C | -8.27163065 | 0.13275326  | 0.90480007  |
| H | -8.61505679 | -1.83455701 | 1.66590300  |
| C | -7.88654603 | 0.93649007  | -0.18294541 |
| H | -7.43887214 | 0.87406702  | -2.29603446 |
| H | -8.45185111 | 0.58888401  | 1.87394864  |
| C | -7.52852074 | 2.36582279  | -0.01310533 |
| C | -6.99524263 | 2.82843324  | 1.20352112  |
| C | -7.58800074 | 3.28663709  | -1.07431261 |
| C | -6.48269621 | 4.11359046  | 1.32973911  |
| H | -6.92685494 | 2.15379609  | 2.05145724  |
| C | -7.05974050 | 4.56833127  | -0.95271418 |
| H | -8.03066444 | 2.98936284  | -2.02078390 |
| C | -6.45721463 | 5.00305916  | 0.24124567  |

|   |             |             |             |
|---|-------------|-------------|-------------|
| H | -6.06999262 | 4.42287427  | 2.28552986  |
| H | -7.06696811 | 5.22352018  | -1.81913414 |
| C | -5.72634253 | 6.29114124  | 0.31738220  |
| C | -6.07076284 | 7.40653517  | -0.46661825 |
| C | -4.58034951 | 6.40269741  | 1.12552264  |
| C | -5.28231533 | 8.55488346  | -0.48019130 |
| H | -6.96446161 | 7.37442078  | -1.08394679 |
| C | -3.79258261 | 7.54618240  | 1.10940614  |
| H | -4.26454763 | 5.55739867  | 1.72931502  |
| C | -4.11131548 | 8.64541489  | 0.29244035  |
| H | -5.56460379 | 9.38836287  | -1.11608858 |
| H | -2.88897082 | 7.57598582  | 1.71122176  |
| C | -3.44588147 | -6.67149818 | 0.52180418  |
| C | -4.83397152 | -6.70203198 | 0.55104031  |
| C | -5.56055294 | -7.69032388 | -0.13913829 |
| C | -4.82318589 | -8.67673589 | -0.81862104 |
| C | -3.42862037 | -8.65457601 | -0.83676892 |
| C | -2.71324003 | -7.63328656 | -0.19256979 |
| H | -2.91463484 | -5.88797824 | 1.05551541  |
| H | -5.36953768 | -5.93197102 | 1.09756152  |
| H | -5.35027415 | -9.45075620 | -1.36745223 |
| H | -2.88926005 | -9.40645919 | -1.40749835 |
| C | -1.23811808 | -7.48682856 | -0.30259673 |
| C | -0.33576211 | -8.50231266 | 0.04940966  |
| C | -0.71104798 | -6.26266399 | -0.74572510 |
| C | 1.04258584  | -8.28410182 | 0.00485175  |
| H | -0.71779920 | -9.45964791 | 0.39491320  |
| C | 0.66079333  | -6.05490636 | -0.81670244 |
| H | -1.39181448 | -5.46777208 | -1.03782258 |
| C | 1.56604494  | -7.05370481 | -0.42211321 |
| H | 1.72178926  | -9.07870120 | 0.30362204  |
| H | 1.04265356  | -5.09126167 | -1.14247841 |
| C | 4.57382624  | 5.95434903  | -0.12557111 |
| C | 4.14846842  | 6.67744190  | 1.00275135  |
| C | 3.82390394  | 6.11199611  | -1.30480839 |
| C | 2.99169243  | 7.45075095  | 0.97483457  |
| H | 4.71879012  | 6.61873789  | 1.92550788  |

|   |              |              |             |
|---|--------------|--------------|-------------|
| C | 2.67817619   | 6.89733759   | -1.33723803 |
| H | 4.11142678   | 5.56996795   | -2.20064189 |
| C | 2.20662604   | 7.55443947   | -0.18721280 |
| H | 2.66646315   | 7.94244012   | 1.88723426  |
| H | 2.12716141   | 6.98423342   | -2.26906720 |
| C | 0.88996675   | 8.23687238   | -0.17715452 |
| C | -0.15799458  | 7.75984258   | -0.98509985 |
| C | 0.60039319   | 9.31164180   | 0.68221223  |
| C | -1.43645683  | 8.29582511   | -0.90245165 |
| H | 0.01453954   | 6.91573010   | -1.64585738 |
| C | -0.68130576  | 9.85118579   | 0.76302597  |
| H | 1.38744111   | 9.73000282   | 1.30374206  |
| C | -1.73704936  | 9.34436569   | -0.01477679 |
| H | -2.22977720  | 7.87041052   | -1.51003429 |
| H | -0.87442836  | 10.66596074  | 1.45406342  |
| C | -3.15396016  | 9.78798641   | 0.16747475  |
| C | -7.05107480  | -7.58729085  | -0.22590449 |
| C | -7.89918437  | -8.65421320  | -0.10883913 |
| C | -3.53508002  | 11.10080288  | 0.21297158  |
| C | -9.34381752  | -8.56292193  | -0.46800481 |
| C | -9.77183095  | -7.96533486  | -1.67033823 |
| C | -10.33028668 | -9.11336205  | 0.36396520  |
| C | -11.11484815 | -7.90469697  | -2.01109719 |
| H | -9.03347036  | -7.54923713  | -2.34822474 |
| C | -11.68708825 | -9.04963916  | 0.04237981  |
| H | -10.03365584 | -9.59733401  | 1.29012334  |
| C | -12.08679975 | -8.44110993  | -1.15323902 |
| H | -11.43870076 | -7.45041873  | -2.94242160 |
| H | -12.41442735 | -9.47702016  | 0.72339908  |
| C | -7.44932556  | -9.98480204  | 0.39377818  |
| C | -6.67378931  | -10.10865015 | 1.56362050  |
| C | -7.82784879  | -11.16825859 | -0.25689814 |
| C | -6.28176433  | -11.34922054 | 2.04417933  |
| H | -6.38099421  | -9.21337274  | 2.10299133  |
| C | -7.43099422  | -12.42423639 | 0.20578040  |
| H | -8.44159386  | -11.10897311 | -1.15128956 |
| C | -6.65154958  | -12.51969812 | 1.36454806  |

|   |              |              |             |
|---|--------------|--------------|-------------|
| H | -5.69100667  | -11.44020992 | 2.95048544  |
| H | -7.73649550  | -13.31097839 | -0.33810876 |
| C | -4.89162915  | 11.52206771  | 0.66859353  |
| C | -5.46924637  | 11.00939577  | 1.84716400  |
| C | -5.62345560  | 12.48578188  | -0.04092435 |
| C | -6.71952192  | 11.42468301  | 2.28075991  |
| H | -4.92107994  | 10.27754279  | 2.43184529  |
| C | -6.88849811  | 12.90517400  | 0.37417801  |
| H | -5.19936037  | 12.91501770  | -0.94423446 |
| C | -7.44456460  | 12.37280238  | 1.54334905  |
| H | -7.15697661  | 11.03252097  | 3.19369812  |
| H | -7.42255321  | 13.64268807  | -0.21430182 |
| C | -2.62393322  | 12.21106993  | -0.19004786 |
| C | -1.88455865  | 12.16395225  | -1.38862438 |
| C | -2.50854002  | 13.36924562  | 0.59289168  |
| C | -1.05966492  | 13.21089716  | -1.77211927 |
| H | -1.96668818  | 11.29131061  | -2.02871161 |
| C | -1.67308473  | 14.42645916  | 0.22830378  |
| H | -3.07927574  | 13.44588927  | 1.51400923  |
| C | -0.94099801  | 14.35051111  | -0.96242415 |
| H | -0.49792140  | 13.17326044  | -2.70036397 |
| H | -1.60590338  | 15.29606741  | 0.87229143  |
| O | -0.10201970  | 15.32310487  | -1.42451614 |
| O | -8.66546616  | 12.71301561  | 2.05025083  |
| O | -13.37984610 | -8.32871490  | -1.57590837 |
| O | -6.21294101  | -13.68979855 | 1.91430537  |
| C | -14.40466219 | -8.85291698  | -0.74747595 |
| H | -14.42328918 | -8.35990106  | 0.23359623  |
| H | -15.34279640 | -8.65319454  | -1.26865508 |
| H | -14.29392259 | -9.93598115  | -0.60312107 |
| C | -6.56039366  | -14.90506067 | 1.27105353  |
| H | -6.16006726  | -14.95079661 | 0.24947598  |
| H | -6.11144450  | -15.69996099 | 1.86956066  |
| H | -7.64873621  | -15.04796794 | 1.23693488  |
| C | 0.05672665   | 16.49792371  | -0.64611665 |
| H | 0.46645252   | 16.27240049  | 0.34746439  |
| H | 0.76261246   | 17.12627460  | -1.19248050 |

|   |              |             |             |
|---|--------------|-------------|-------------|
| H | -0.89285403  | 17.03711003 | -0.52907582 |
| C | -9.44280293  | 13.66673023 | 1.34490658  |
| H | -9.68565353  | 13.32050861 | 0.33145443  |
| H | -10.36554761 | 13.78291724 | 1.91644274  |
| H | -8.93212778  | 14.63686713 | 1.28028326  |
| C | 10.32013510  | -2.27530790 | 0.05542286  |
| C | 11.65034472  | -2.56203818 | 0.10536334  |
| C | 12.15918347  | -3.94543154 | 0.34193659  |
| C | 13.19242321  | -4.47254577 | -0.45894641 |
| C | 11.66883677  | -4.75426479 | 1.37568834  |
| C | 13.68441449  | -5.75345202 | -0.25682438 |
| H | 13.60833468  | -3.86417936 | -1.25695840 |
| C | 12.16097092  | -6.04141308 | 1.60055142  |
| H | 10.88844199  | -4.37234221 | 2.02571877  |
| C | 13.17058544  | -6.55124742 | 0.77674488  |
| H | 14.47133710  | -6.16045335 | -0.88438012 |
| H | 11.75499847  | -6.62803236 | 2.41686784  |
| C | 12.70031356  | -1.51653521 | -0.07815524 |
| C | 12.66278738  | -0.60141393 | -1.13850862 |
| C | 13.79886357  | -1.44468520 | 0.80188920  |
| C | 13.65712953  | 0.36271347  | -1.31488439 |
| H | 11.84215486  | -0.64200527 | -1.84741154 |
| C | 14.78900802  | -0.48555797 | 0.64812576  |
| H | 13.86841969  | -2.15242885 | 1.62302372  |
| C | 14.72558189  | 0.42941787  | -0.41373022 |
| H | 13.58887223  | 1.04603040  | -2.15375678 |
| H | 15.62690818  | -0.42524593 | 1.33587844  |
| C | 9.23684312   | -3.31156328 | 0.04888744  |
| C | 8.24347852   | -3.28439482 | 1.04202340  |
| C | 9.08928183   | -4.23330333 | -0.99937995 |
| C | 7.13830618   | -4.12457165 | 0.97873037  |
| H | 8.32518793   | -2.56784293 | 1.85513312  |
| C | 7.96196856   | -5.05141346 | -1.08277693 |
| H | 9.85234373   | -4.28686150 | -1.77088353 |
| C | 6.95527832   | -4.99910777 | -0.10605314 |
| H | 6.36757587   | -4.05580723 | 1.74167439  |
| H | 7.85689994   | -5.73427654 | -1.92219197 |

|   |             |             |             |
|---|-------------|-------------|-------------|
| C | 9.75924590  | -0.88740536 | -0.01121631 |
| C | 8.87585809  | -0.54820493 | -1.05033745 |
| C | 9.98062868  | 0.06671035  | 0.99484701  |
| C | 8.23319666  | 0.68303715  | -1.07760854 |
| H | 8.66981457  | -1.27594877 | -1.83053075 |
| C | 9.31093778  | 1.29048234  | 0.98483727  |
| H | 10.66882353 | -0.16352214 | 1.80319405  |
| C | 8.41299559  | 1.61831351  | -0.04387483 |
| H | 7.53051579  | 0.90217566  | -1.87687349 |
| H | 9.48630987  | 2.00186307  | 1.78799206  |
| C | 7.58592160  | 2.84987225  | -0.02520502 |
| C | 7.34623744  | 3.58880466  | -1.19610898 |
| C | 6.91667331  | 3.25134461  | 1.14220871  |
| C | 6.42997417  | 4.63489032  | -1.21424867 |
| H | 7.88489781  | 3.33522556  | -2.10538513 |
| C | 5.98670848  | 4.28652305  | 1.11924074  |
| H | 7.06950737  | 2.69322011  | 2.06203436  |
| C | 5.69276962  | 4.98174000  | -0.06742128 |
| H | 6.27924867  | 5.18685291  | -2.13754802 |
| H | 5.42720736  | 4.50784203  | 2.02331616  |
| C | 5.66762412  | -5.72681413 | -0.24207808 |
| C | 5.07917499  | -6.39703172 | 0.84277501  |
| C | 4.93428373  | -5.64381930 | -1.43698308 |
| C | 3.78292843  | -6.90125070 | 0.75945352  |
| H | 5.63560641  | -6.49902069 | 1.77095978  |
| C | 3.63137567  | -6.12715858 | -1.51304855 |
| H | 5.36839365  | -5.13407291 | -2.29298120 |
| C | 3.01720156  | -6.73351098 | -0.40527244 |
| H | 3.33332191  | -7.37402691 | 1.62885810  |
| H | 3.06768365  | -6.00920825 | -2.43479878 |
| O | 15.74889808 | 1.33030148  | -0.48363832 |
| O | 13.72324229 | -7.79353366 | 0.89898175  |
| C | 15.73284385 | 2.28273161  | -1.53455623 |
| H | 14.84030625 | 2.92068703  | -1.48809770 |
| H | 16.62364316 | 2.89805354  | -1.39486063 |
| H | 15.77792668 | 1.79908762  | -2.51951533 |
| C | 13.23731004 | -8.64547728 | 1.92355681  |

|   |             |             |            |
|---|-------------|-------------|------------|
| H | 12.16730973 | -8.85823416 | 1.79857428 |
| H | 13.80271079 | -9.57494431 | 1.83359845 |
| H | 13.40411433 | -8.21545367 | 2.92022643 |

**TPE-2**

|   |             |             |             |
|---|-------------|-------------|-------------|
| C | 3.61175127  | -2.25159778 | -0.18561758 |
| C | 3.41345664  | -1.16915104 | -1.05961997 |
| C | 2.26388277  | -0.38863322 | -0.99388563 |
| C | 1.25617555  | -0.65298055 | -0.05053479 |
| C | 1.44528828  | -1.74907448 | 0.80972418  |
| C | 2.59992498  | -2.52307981 | 0.75108121  |
| H | 4.18141307  | -0.92181110 | -1.78739955 |
| H | 2.14352286  | 0.44517634  | -1.67840009 |
| H | 0.67211297  | -1.99798675 | 1.53118927  |
| H | 2.70555548  | -3.37131605 | 1.42190280  |
| C | -3.61175461 | -2.25159250 | 0.18562240  |
| C | -2.59992595 | -2.52307465 | -0.75107395 |
| C | -1.44528797 | -1.74907096 | -0.80971275 |
| C | -1.25617576 | -0.65297870 | 0.05054837  |
| C | -2.26388478 | -0.38863152 | 0.99389739  |
| C | -3.41346050 | -1.16914733 | 1.05962697  |
| H | -2.70555577 | -3.37130952 | -1.42189734 |
| H | -0.67211136 | -1.99798321 | -1.53117638 |
| H | -2.14352555 | 0.44517683  | 1.67841349  |
| H | -4.18141856 | -0.92180664 | 1.78740465  |
| C | 0.00000198  | 1.52293964  | 0.00000672  |
| C | 0.00000087  | 0.15347412  | 0.00000880  |
| C | 1.23508643  | 2.32487150  | 0.24271363  |
| C | 1.54891976  | 3.42895604  | -0.56346344 |
| C | 2.10136724  | 2.04159005  | 1.31724657  |
| C | 2.68858070  | 4.20423102  | -0.34262728 |
| H | 0.89177615  | 3.68691968  | -1.38913069 |
| C | 3.23070396  | 2.80953666  | 1.55892186  |
| H | 1.87733493  | 1.20635137  | 1.97313997  |
| C | 3.53880085  | 3.89534625  | 0.72563047  |
| H | 2.89746820  | 5.04012597  | -1.00075051 |
| H | 3.89114179  | 2.59157701  | 2.39255126  |



|   |             |             |             |
|---|-------------|-------------|-------------|
| C | -1.23508138 | 2.32487146  | -0.24270771 |
| C | -1.54891492 | 3.42896141  | 0.56346302  |
| C | -2.10135999 | 2.04158541  | -1.31724038 |
| C | -2.68857318 | 4.20423711  | 0.34261937  |
| H | -0.89177199 | 3.68692850  | 1.38912989  |
| C | -3.23069493 | 2.80953324  | -1.55892333 |
| H | -1.87732913 | 1.20634154  | -1.97312775 |
| C | -3.53879159 | 3.89534776  | -0.72563904 |
| H | -2.89746288 | 5.04013549  | 1.00073785  |
| H | -3.89113222 | 2.59156775  | -2.39255164 |
| C | -4.83956550 | -3.08239150 | 0.25445917  |
| C | -5.44078161 | -3.38590963 | 1.48836475  |
| C | -5.43619539 | -3.58949599 | -0.91301838 |
| C | -6.59445834 | -4.16564948 | 1.55270060  |
| H | -4.98326925 | -3.02816176 | 2.40657082  |
| C | -6.58904390 | -4.37051782 | -0.84949231 |
| H | -5.00548686 | -3.34626377 | -1.88035372 |
| C | -7.17440887 | -4.66237976 | 0.38391659  |
| H | -7.03605527 | -4.39322863 | 2.51955204  |
| H | -7.03610184 | -4.74439689 | -1.76706080 |
| H | -8.07341508 | -5.27080484 | 0.43377617  |
| C | 4.83955982  | -3.08239932 | -0.25446007 |
| C | 5.44076959  | -3.38591786 | -1.48836857 |
| C | 5.43619348  | -3.58950570 | 0.91301468  |
| C | 6.59444394  | -4.16566069 | -1.55270993 |
| H | 4.98325375  | -3.02816787 | -2.40657210 |
| C | 6.58904004  | -4.37052995 | 0.84948296  |
| H | 5.00548930  | -3.34627294 | 1.88035185  |
| C | 7.17439845  | -4.66239272 | -0.38392874 |
| H | 7.03603590  | -4.39324084 | -2.51956339 |
| H | 7.03610157  | -4.74441033 | 1.76704912  |
| H | 8.07340302  | -5.27081992 | -0.43379268 |
| O | 4.67282568  | 4.58568512  | 1.04360605  |
| O | -4.67281344 | 4.58568829  | -1.04362020 |
| C | 5.03371809  | 5.69244550  | 0.23369890  |
| H | 5.95880375  | 6.08608580  | 0.65903308  |
| H | 5.21318608  | 5.39064688  | -0.80681615 |

|   |             |            |             |
|---|-------------|------------|-------------|
| H | 4.26422589  | 6.47582352 | 0.25270746  |
| C | -5.03371679 | 5.69243767 | -0.23370338 |
| H | -5.95880528 | 6.08607363 | -0.65903553 |
| H | -5.21318220 | 5.39062920 | 0.80680889  |
| H | -4.26423152 | 6.47582309 | -0.25270549 |

**[2]OHPE-2**

|   |             |             |             |
|---|-------------|-------------|-------------|
| C | 11.09227710 | 3.80545747  | -0.65022645 |
| C | 11.55228093 | 3.02000887  | 0.42045920  |
| C | 11.02699800 | 1.75574578  | 0.66695999  |
| C | 10.01557258 | 1.21543081  | -0.14559837 |
| C | 9.54059478  | 2.01028522  | -1.20380608 |
| C | 10.07347436 | 3.27034533  | -1.45681014 |
| H | 12.34886869 | 3.39645271  | 1.05633599  |
| H | 11.40863317 | 1.17044061  | 1.49766297  |
| H | 8.73906418  | 1.63374038  | -1.83313007 |
| H | 9.67202013  | 3.86254042  | -2.27461670 |
| C | 5.07400860  | -0.14378777 | 0.08184760  |
| C | 5.79229500  | 0.83415607  | 0.79153151  |
| C | 7.18332281  | 0.83649191  | 0.80842471  |
| C | 7.92392103  | -0.15145945 | 0.13540681  |
| C | 7.20519328  | -1.12258423 | -0.58282077 |
| C | 5.81457411  | -1.11850990 | -0.60914022 |
| H | 5.25380431  | 1.62189505  | 1.31124162  |
| H | 7.70896389  | 1.61878091  | 1.34877764  |
| H | 7.74805373  | -1.89356331 | -1.12056556 |
| H | 5.29278110  | -1.89848793 | -1.15676374 |
| C | 10.17717141 | -1.23752999 | 0.37580287  |
| C | 9.41710698  | -0.12378217 | 0.13597054  |
| C | 11.64188588 | -1.28485649 | 0.09353061  |
| C | 12.53900652 | -1.83089060 | 1.02329034  |
| C | 12.17357122 | -0.83693894 | -1.13205262 |
| C | 13.91019516 | -1.90304317 | 0.77172470  |
| H | 12.15997575 | -2.20312631 | 1.97085299  |
| C | 13.53150640 | -0.91332295 | -1.40356605 |
| H | 11.50475235 | -0.42712584 | -1.88221107 |
| C | 14.41445790 | -1.44163783 | -0.44984705 |

|   |             |             |             |
|---|-------------|-------------|-------------|
| H | 14.56685317 | -2.32093168 | 1.52647283  |
| H | 13.93526573 | -0.57358961 | -2.35234466 |
| C | 9.60252730  | -2.49444287 | 0.93912543  |
| C | 9.93149897  | -3.74526853 | 0.39631418  |
| C | 8.75574866  | -2.48062969 | 2.06525572  |
| C | 9.42078312  | -4.93451173 | 0.91932109  |
| H | 10.59739646 | -3.79318053 | -0.46064901 |
| C | 8.25002767  | -3.65357870 | 2.60557439  |
| H | 8.49699374  | -1.53100215 | 2.52271088  |
| C | 8.57290734  | -4.89270563 | 2.03233265  |
| H | 9.69240144  | -5.87708867 | 0.45752004  |
| H | 7.60375424  | -3.63808823 | 3.47776199  |
| C | 3.59180155  | -0.14231242 | 0.05704557  |
| C | 2.87972070  | -0.51637882 | -1.09550756 |
| C | 2.84379223  | 0.23295540  | 1.18622830  |
| C | 1.48889093  | -0.51598179 | -1.11758244 |
| H | 3.42435210  | -0.79538253 | -1.99321331 |
| C | 1.45297058  | 0.23406472  | 1.16410223  |
| H | 3.36012741  | 0.51140435  | 2.10067721  |
| C | 0.74117439  | -0.14072199 | 0.01169849  |
| H | 0.97253740  | -0.82927978 | -2.02073635 |
| H | 0.90853482  | 0.54804391  | 2.05036208  |
| C | 11.65536344 | 5.15281943  | -0.91486785 |
| C | 12.02180810 | 6.00527456  | 0.14112442  |
| C | 11.83843945 | 5.61454103  | -2.22993375 |
| C | 12.55172943 | 7.27029648  | -0.10790366 |
| H | 11.86476914 | 5.68178819  | 1.16635847  |
| C | 12.36698968 | 6.87994698  | -2.47984587 |
| H | 11.58776914 | 4.96360959  | -3.06292068 |
| C | 12.72677227 | 7.71433503  | -1.41989705 |
| H | 12.81997943 | 7.91421698  | 0.72576603  |
| H | 12.50637449 | 7.21111478  | -3.50574816 |
| H | 13.13927159 | 8.70069619  | -1.61435232 |
| O | 15.73096136 | -1.47009758 | -0.80996150 |
| O | 8.02248050  | -5.98750135 | 2.63408271  |
| C | 16.66875160 | -1.99281423 | 0.11654569  |
| H | 17.64373248 | -1.91639863 | -0.36844677 |

|   |              |             |             |
|---|--------------|-------------|-------------|
| H | 16.68182239  | -1.41329701 | 1.04925850  |
| H | 16.46230056  | -3.04572219 | 0.35091655  |
| C | 8.31353789   | -7.26656626 | 2.09520651  |
| H | 7.77508014   | -7.98364715 | 2.71770384  |
| H | 7.96708464   | -7.35636128 | 1.05700737  |
| H | 9.38857946   | -7.48754829 | 2.13538051  |
| C | -5.07400523  | -0.14379062 | -0.08188919 |
| C | -5.81456802  | -1.11847446 | 0.60915523  |
| C | -7.20518699  | -1.12254846 | 0.58284458  |
| C | -7.92391902  | -0.15146152 | -0.13543065 |
| C | -7.18332339  | 0.83645689  | -0.80849941 |
| C | -5.79229521  | 0.83411988  | -0.79161580 |
| H | -5.29277242  | -1.89842243 | 1.15681932  |
| H | -7.74804400  | -1.89349627 | 1.12063688  |
| H | -7.70896627  | 1.61872114  | -1.34888618 |
| H | -5.25380727  | 1.62183418  | -1.31136604 |
| C | -11.09221714 | 3.80549169  | 0.65020561  |
| C | -10.07343658 | 3.27035724  | 1.45680238  |
| C | -9.54057583  | 2.01028854  | 1.20380042  |
| C | -10.01555258 | 1.21544679  | 0.14558293  |
| C | -11.02695408 | 1.75578527  | -0.66698977 |
| C | -11.55221759 | 3.02005667  | -0.42049164 |
| H | -9.67198383  | 3.86254125  | 2.27461777  |
| H | -8.73906196  | 1.63372659  | 1.83313529  |
| H | -11.40858533 | 1.17049261  | -1.49770303 |
| H | -12.34878725 | 3.39651882  | -1.05638023 |
| C | -10.17718601 | -1.23751865 | -0.37579191 |
| C | -9.41710497  | -0.12377522 | -0.13598178 |
| C | -9.60257927  | -2.49443175 | -0.93915354 |
| C | -9.93150161  | -3.74525511 | -0.39630709 |
| C | -8.75589916  | -2.48062476 | -2.06535836 |
| C | -9.42082408  | -4.93450043 | -0.91934721 |
| H | -10.59732666 | -3.79316374 | 0.46071244  |
| C | -8.25021881  | -3.65357556 | -2.60571049 |
| H | -8.49719076  | -1.53100090 | -2.52284655 |
| C | -8.57304249  | -4.89269945 | -2.03243045 |
| H | -9.69239943  | -5.87707491 | -0.45751581 |

|   |              |             |             |
|---|--------------|-------------|-------------|
| H | -7.60402153  | -3.63808929 | -3.47795459 |
| C | -11.64188837 | -1.28484124 | -0.09345679 |
| C | -12.53905452 | -1.83082969 | -1.02319928 |
| C | -12.17351697 | -0.83697096 | 1.13216857  |
| C | -13.91023321 | -1.90297912 | -0.77157780 |
| H | -12.16006873 | -2.20302965 | -1.97079387 |
| C | -13.53144083 | -0.91335317 | 1.40373745  |
| H | -11.50466223 | -0.42719806 | 1.88231657  |
| C | -14.41443906 | -1.44161927 | 0.45003449  |
| H | -14.56692757 | -2.32083021 | -1.52631506 |
| H | -13.93515566 | -0.57365656 | 2.35254812  |
| C | -11.65528290 | 5.15286291  | 0.91484426  |
| C | -12.02169613 | 6.00532927  | -0.14114997 |
| C | -11.83837066 | 5.61458231  | 2.22990944  |
| C | -12.55159809 | 7.27035977  | 0.10787552  |
| H | -11.86464759 | 5.68184428  | -1.16638302 |
| C | -12.36690157 | 6.87999688  | 2.47981885  |
| H | -11.58772506 | 4.96364264  | 3.06289744  |
| C | -12.72665272 | 7.71439600  | 1.41986810  |
| H | -12.81982380 | 7.91428868  | -0.72579551 |
| H | -12.50629601 | 7.21116277  | 3.50572044  |
| H | -13.13913697 | 8.70076381  | 1.61432127  |
| C | -3.59179807  | -0.14231338 | -0.05709186 |
| C | -2.87971488  | -0.51632516 | 1.09547738  |
| C | -2.84379056  | 0.23289552  | -1.18629591 |
| C | -1.48888516  | -0.51592556 | 1.11755140  |
| H | -3.42434494  | -0.79528665 | 1.99319735  |
| C | -1.45296894  | 0.23400691  | -1.16417060 |
| H | -3.36012693  | 0.51129650  | -2.10075856 |
| C | -0.74117038  | -0.14072113 | -0.01174973 |
| H | -0.97253071  | -0.82917835 | 2.02072038  |
| H | -0.90853427  | 0.54794181  | -2.05044700 |
| O | -8.02266164  | -5.98749738 | -2.63421863 |
| O | -15.73092717 | -1.47008080 | 0.81020451  |
| C | -8.31367055  | -7.26655969 | -2.09531003 |
| H | -7.77526392  | -7.98364318 | -2.71784856 |
| H | -7.96712920  | -7.35634763 | -1.05713963 |

|   |              |             |             |
|---|--------------|-------------|-------------|
| H | -9.38871509  | -7.48754427 | -2.13539159 |
| C | -16.66876224 | -1.99275332 | -0.11628234 |
| H | -17.64372115 | -1.91634993 | 0.36875618  |
| H | -16.68186980 | -1.41319854 | -1.04897131 |
| H | -16.46232919 | -3.04565338 | -0.35070452 |

## 8. References

- [1] J. -C. Zhu, T. Han, Y. Guo, P. Wang, H. -L. Xie, Z. -G. Meng, Z. -Q. Yu, B. Z. Tang, *Macromolecules* **2019**, *52*, 3668-3679.
- [2] X. Xu, P. Liu, P. Li, Z. Qu, X. Huo, W. Yang, B. He, W. Zhang, L. Ji, J. Hu, *Faming Zhuanli Shenqing* **2017**, CN 107286327 A.
- [3] G. M. Sheldrick, *Acta Cryst.* **2008**, *A64*, 112-122.
- [4] M. J. Frisch, G. W. Trucks, H. B. Schlegel, G. E. Scuseria, M. A. Robb, J. R. Cheeseman, G. Scalmani, V. Barone, G. A. Petersson, H. Nakatsuji, X. Li, M. Caricato, H. P. Marenich, J. Bloino, B. G. Janesko, R. Comperts, B. Mennucci, H. P. Hratchian, J. V. Ortiz, A. F. Izmaylov, J. L. Sonnenberg, D. Williams-Young, F. Ding, F. Lipparini, F. Egidi, J. Goings, B. Peng, A. Petrone, T. Henderson, D. Ranasinghe, V. G. Zakrzewski, J. Gao, N. Rega, G. Zheng, W. Liang, M. Hada, M. Ehara, K. Toyota, R. Fukuda, J. Hasegawa, M. Ishida, T. Nakajima, Y. Honda, O. Kitao, H. Nakai, T. Vreven, K. Throssell, J. A. Montgomery, Jr, J. E. Peralta, F. Ogliaro, M. J. Bearpark, J. J. Heyd, E. N. Brothers, K. N. Kudin, V. N. Staroverov, T. A. Keith, R. Kobayashi, J. Normand, K. Raghavachari, A. P. Rendell, J. C. Burant, S. S. Iyengar, J. Tomasi, M. Cossi, J. M. Millam, M. Klene, C. Adamo, R. Cammi, J. W. Ochterski, R. L. Martin, K. Morokuma, O. Farkas, J. B. Foresman, D. J. Fox, Gaussian 16, Revision A.03, Gaussian Inc, Wallingford CT, **2016**.
- [5] (a) R. Ditchfield, W. J. Hehre, J. A. Pople, *J. Chem. Phys.* **1971**, *54*, 724. (b) W. J. Hehre, R. Ditchfield, J. A. Pople, *J. Chem. Phys.* **1972**, *56*, 2257. (c) P. C. Hariharan, J. A. Pople, *Theor. Chim. Acc.* **1973**, *28*, 213–222. (d) M. M. Francl, W. J. Pietro, W. J. Hehre, J. S. Binkley, M. S. Gordon, D. J. DeFrees, J. A. Pople, *J. Chem. Phys.* **1982**, *77*, 3654-3665.
- [6] (a) P. v. R. Schleyer, C. Maerker, A. Dransfeld, H. J. Jiao, N. J. R. v. E. Hommes, *J. Am. Chem. Soc.* 1996, *118*, 6317-6318. (b) Z. Chen, C. S. Wannere, C. Corminboeuf, R. Puchta, P. V. R. Schleyer, *Chem. Rev.* 2005, *105*, 3842-3888. (c) A. V. Marenich, C. J. Cramer, D. J. Truhlar, *J. Phys. Chem. B* 2009, *113*, 6378-6396.
- [7] R. Dennington, T. A. Keith, J. M. Millam, GaussView, Version 6, Semichem Inc., Shawnee Mission, KS, 2016.
